# Supplementary material
Source: PubMed Central journal article supplement (PMC7860943)
Supplement: mmc1.pdf [file mmc1.pdf]

Supplementary File 1: Details of asymptomatic samples used in the study

**Supplementary File 1: Details of asymptomatic samples used in the study**

|      |                |                                |        |             |                | Mutational Site | 178 | 241 | 313 | 606 | 829 | 884 | 1069 | 1227 | 1281 | 1397 | 1758 | 1820 | 1846 | 2879 | 3037 | 3176 |   |
|------|----------------|--------------------------------|--------|-------------|----------------|-----------------|-----|-----|-----|-----|-----|-----|------|------|------|------|------|------|------|------|------|------|---|
|      |                |                                |        |             |                | Reference Nt    |     |     |     |     |     |     |      |      |      |      |      |      |      |      |      |      |   |
|      |                |                                |        |             |                | (NC_045512.2)   | A   | C   | C   | T   | C   | C   | G    | T    | C    | G    | C    | G    | A    | G    | C    | C    |   |
| S No | Accession ID   | Location                       | Gender | Patient Age | Patient status | Genome ID       |     |     |     |     |     |     |      |      |      |      |      |      |      |      |      |      |   |
|      |                | Asia / India / Telangana /     |        |             | Asymptomatic/  |                 |     |     |     |     |     |     |      |      |      |      |      |      |      |      |      |      |   |
| 1    | EPI_ISL_431102 | Hyderabad                      | Female | 24          | Released       | 431102          | .   | T   | .   | .   | .   | .   | .    | .    | .    | .    | .    | .    | .    | .    | .    | T    | . |
| 2    | EPI_ISL_436157 | Asia / India / Karnataka       | Female | 50          | Asymptomatic   | 436157          | .   | .   | .   | .   | .   | .   | .    | .    | .    | .    | .    | .    | .    | .    | .    | .    | T |
| 3    | EPI_ISL_454560 | Asia / India / Maharashtra     | Male   | 38          | Asymptomatic   | 454560          | .   | T   | .   | .   | .   | .   | .    | .    | .    | .    | .    | .    | .    | .    | .    | T    | . |
| 4    | EPI_ISL_454561 | Asia / India / Maharashtra     | Female | 24          | Asymptomatic   | 454561          | .   | .   | .   | .   | .   | .   | .    | .    | .    | .    | A    | T    | .    | .    | .    | .    | . |
| 5    | EPI_ISL_479493 | Asia / India / Maharashtra     | Female | 42          | Asymptomatic   | 479493          | .   | T   | T   | .   | .   | .   | .    | .    | .    | .    | .    | .    | .    | .    | .    | T    | . |
| 6    | EPI_ISL_479520 | Asia / India / Maharashtra     | Female | 65          | Asymptomatic   | 479520          | .   | .   | .   | T   | .   | .   | .    | .    | .    | .    | .    | .    | .    | .    | .    | .    | . |
| 7    | EPI_ISL_479540 | Asia / India / Maharashtra     | Male   | 65          | Asymptomatic   | 479540          | .   | T   | T   | .   | .   | .   | .    | .    | .    | .    | .    | .    | A    | .    | T    | .    | . |
| 8    | EPI_ISL_479544 | Asia / India / Maharashtra     | Female | 38          | Asymptomatic   | 479544          | .   | T   | .   | .   | .   | .   | .    | .    | .    | .    | .    | .    | .    | .    | .    | T    | . |
| 9    | EPI_ISL_479547 | Asia / India / Maharashtra     | Female | 43          | Asymptomatic   | 479547          | .   | T   | T   | .   | .   | .   | .    | .    | .    | .    | .    | .    | .    | .    | .    | T    | . |
| 10   | EPI_ISL_479552 | Asia / India / Maharashtra     | Female | 22          | Asymptomatic   | 479552          | .   | T   | T   | .   | .   | .   | .    | .    | .    | .    | .    | .    | .    | .    | .    | T    | . |
| 11   | EPI_ISL_486382 | Asia / India / Karnataka       | Male   | 43          | Asymptomatic   | 486382          | .   | .   | .   | .   | .   | .   | .    | .    | .    | .    | .    | .    | .    | .    | .    | .    | T |
| 12   | EPI_ISL_486383 | Asia / India / Karnataka       | Male   | 58          | Asymptomatic   | 486383          | .   | T   | .   | .   | .   | .   | .    | .    | .    | .    | .    | .    | .    | .    | .    | T    | . |
| 13   | EPI_ISL_486388 | Asia / India / Karnataka       | Male   | 22          | Asymptomatic   | 486388          | .   | .   | .   | .   | .   | A   | .    | .    | .    | .    | .    | .    | .    | .    | .    | .    | . |
| 14   | EPI_ISL_486389 | Asia / India / Karnataka       | Female | 15          | Asymptomatic   | 486389          | .   | .   | .   | .   | .   | .   | .    | .    | .    | .    | .    | .    | .    | .    | .    | .    | . |
| 15   | EPI_ISL_486392 | Asia / India / Karnataka       | Male   | 28          | Asymptomatic   | 486392          | .   | .   | .   | .   | .   | .   | .    | .    | .    | .    | .    | .    | .    | .    | .    | .    | . |
| 16   | EPI_ISL_486394 | Asia / India / Karnataka       | Male   | 60          | Asymptomatic   | 486394          | .   | .   | .   | .   | .   | .   | .    | T    | .    | .    | .    | .    | .    | .    | .    | .    | . |
| 17   | EPI_ISL_486395 | Asia / India / Karnataka       | Female | 80          | Asymptomatic   | 486395          | .   | .   | .   | .   | .   | .   | .    | .    | T    | .    | .    | .    | .    | .    | .    | .    | . |
| 18   | EPI_ISL_486398 | Asia / India / Karnataka       | Female | 22          | Asymptomatic   | 486398          | .   | .   | .   | .   | .   | .   | .    | T    | .    | .    | .    | .    | .    | .    | .    | .    | . |
| 19   | EPI_ISL_486399 | Asia / India / Karnataka       | Male   | 12          | Asymptomatic   | 486399          | .   | .   | .   | .   | .   | .   | .    | T    | .    | .    | .    | .    | .    | .    | .    | .    | . |
| 20   | EPI_ISL_486400 | Asia / India / Karnataka       | Male   | 34          | Asymptomatic   | 486400          | G   | .   | .   | C   | .   | T   | .    | .    | .    | A    | .    | .    | .    | .    | .    | .    | . |
| 21   | EPI_ISL_486408 | Asia / India / Karnataka       | Female | 16          | Asymptomatic   | 486408          | .   | .   | .   | .   | .   | .   | .    | .    | .    | .    | .    | .    | .    | .    | .    | .    | . |
| 22   | EPI_ISL_486409 | Asia / India / Karnataka       | Male   | 17          | Asymptomatic   | 486409          | .   | .   | .   | .   | .   | .   | .    | .    | .    | .    | .    | .    | .    | .    | .    | .    | . |
|      |                | Asia / India / Uttar Pradesh / |        |             |                |                 |     |     |     |     |     |     |      |      |      |      |      |      |      |      |      |      |   |
| 23   | EPI_ISL_516940 | Lucknow / Balrampur            | Male   | 48          | Asymptomatic   | 516940          | .   | .   | .   | .   | .   | .   | .    | .    | .    | .    | .    | .    | .    | .    | .    | .    | . |
|      |                | Asia / India / Uttar Pradesh / |        |             |                |                 |     |     |     |     |     |     |      |      |      |      |      |      |      |      |      |      |   |
| 24   | EPI_ISL_516942 | Lucknow / Balrampur            | Male   | 55          | Asymptomatic   | 516942          | .   | .   | .   | .   | .   | .   | .    | .    | .    | .    | .    | .    | .    | .    | .    | .    | . |
|      |                | Asia / India / Uttar Pradesh / |        |             |                |                 |     |     |     |     |     |     |      |      |      |      |      |      |      |      |      |      |   |
| 25   | EPI_ISL_516943 | Lucknow / Balrampur            | Male   | 47          | Asymptomatic   | 516943          | .   | .   | .   | .   | .   | .   | .    | .    | .    | .    | .    | .    | .    | .    | .    | .    | . |
|      |                | Asia / India / Uttar Pradesh / |        |             |                |                 |     |     |     |     |     |     |      |      |      |      |      |      |      |      |      |      |   |
| 26   | EPI_ISL_516974 | Pilibhit                       | Male   | 33          | Asymptomatic   | 516974          | .   | T   | T   | .   | .   | .   | .    | .    | .    | .    | .    | .    | .    | .    | .    | T    | . |
| 27   | EPI_ISL_528382 | Asia / India / Haryana         | Male   | 49          | Asymptomatic   | 528382          | .   | .   | .   | .   | .   | .   | .    | C    | T    | .    | T    | .    | .    | .    | .    | .    | . |
| 28   | EPI_ISL_528383 | Asia / India / Haryana         | Male   | 49          | Asymptomatic   | 528383          | .   | .   | .   | .   | .   | .   | .    | C    | T    | .    | T    | .    | .    | .    | .    | .    | . |
| 29   | EPI_ISL_528384 | Asia / India / Haryana         | Male   | 49          | Asymptomatic   | 528384          | .   | .   | .   | .   | .   | .   | .    | C    | T    | .    | T    | .    | .    | .    | .    | .    | . |
| 30   | EPI_ISL_528385 | Asia / India / Haryana         | Male   | 49          | Asymptomatic   | 528385          | .   | .   | .   | .   | .   | .   | .    | C    | T    | .    | T    | .    | .    | .    | .    | .    | . |

Supplementary File 1: Details of asymptomatic samples used in the study

| Mutational Site               | 3634 | 3742 | 3791 | 4128 | 4300 | 4885 | 5055 | 5301 | 5700 | 6058 | 6059 | 6060 | 6113 | 6310 | 6312 | 6552 | 6997 | 7211 | 7582 | 7739 | 7975 | 8653 | 11243 | 11506 | 12167 | 14408 | 15435 | 16092 |
|-------------------------------|------|------|------|------|------|------|------|------|------|------|------|------|------|------|------|------|------|------|------|------|------|------|-------|-------|-------|-------|-------|-------|
| Reference Nt<br>(NC_045512.2) | C    | A    | G    | G    | G    | T    | C    | C    | C    | A    | T    | G    | C    | C    | C    | T    | C    | T    | T    | G    | G    | G    | G     | A     | G     | C     | A     | C     |
| Genome ID                     |      |      |      |      |      |      |      |      |      |      |      |      |      |      |      |      |      |      |      |      |      |      |       |       |       |       |       |       |
| 431102                        | .    | .    | .    | .    | .    | .    | .    | .    | .    | .    | .    | .    | .    | .    | .    | .    | .    | .    | .    | .    | .    | .    | .     | .     | .     | T     | .     | .     |
| 436157                        | .    | .    | .    | .    | .    | .    | .    | .    | .    | .    | .    | .    | .    | .    | .    | .    | .    | .    | .    | .    | T    | .    | .     | .     | .     | .     | G     | .     |
| 454560                        | T    | .    | .    | .    | .    | .    | T    | .    | .    | .    | .    | .    | .    | .    | .    | .    | .    | .    | .    | .    | .    | .    | .     | .     | .     | T     | .     | .     |
| 454561                        | .    | .    | .    | .    | .    | .    | .    | T    | .    | T    | A    | T    | T    | A    | A    | .    | .    | .    | .    | .    | .    | .    | .     | T     | .     | .     | .     | .     |
| 479493                        | .    | .    | .    | .    | .    | .    | .    | A    | .    | .    | .    | .    | .    | .    | .    | .    | .    | .    | .    | .    | .    | .    | .     | .     | .     | T     | .     | .     |
| 479520                        | .    | .    | .    | .    | .    | .    | .    | .    | .    | .    | .    | .    | .    | A    | .    | .    | .    | .    | .    | .    | .    | .    | .     | .     | .     | .     | .     | .     |
| 479540                        | .    | .    | .    | .    | .    | .    | .    | A    | .    | .    | .    | .    | .    | .    | .    | .    | .    | .    | .    | .    | .    | .    | T     | .     | .     | T     | .     | .     |
| 479544                        | .    | .    | T    | .    | .    | .    | .    | A    | .    | .    | .    | .    | .    | .    | A    | .    | .    | C    | .    | .    | .    | .    | .     | .     | .     | .     | .     | .     |
| 479547                        | .    | .    | .    | .    | .    | .    | .    | A    | .    | .    | .    | .    | .    | .    | .    | .    | .    | .    | .    | .    | .    | .    | .     | .     | .     | .     | .     | .     |
| 479552                        | .    | .    | .    | .    | .    | .    | .    | A    | .    | .    | .    | .    | .    | .    | .    | .    | .    | .    | .    | .    | .    | .    | .     | .     | .     | T     | .     | .     |
| 486382                        | .    | .    | .    | .    | .    | .    | .    | .    | .    | .    | .    | .    | .    | .    | A    | .    | .    | .    | .    | .    | .    | .    | .     | .     | .     | .     | .     | .     |
| 486383                        | T    | G    | .    | .    | .    | .    | T    | .    | .    | .    | .    | .    | .    | .    | .    | .    | .    | .    | .    | .    | .    | .    | .     | .     | .     | T     | .     | .     |
| 486388                        | .    | .    | .    | .    | .    | .    | .    | .    | .    | .    | .    | .    | .    | .    | A    | .    | .    | .    | .    | .    | .    | .    | .     | .     | .     | .     | .     | .     |
| 486389                        | .    | .    | .    | .    | .    | .    | .    | .    | .    | .    | .    | .    | .    | .    | A    | .    | .    | .    | .    | .    | .    | .    | .     | .     | .     | .     | .     | .     |
| 486392                        | .    | .    | .    | .    | .    | .    | .    | .    | .    | .    | .    | .    | .    | .    | A    | .    | .    | .    | A    | .    | .    | .    | .     | .     | .     | .     | .     | .     |
| 486394                        | .    | .    | .    | .    | .    | .    | .    | .    | .    | .    | .    | .    | .    | .    | A    | .    | .    | .    | .    | .    | .    | .    | .     | .     | .     | .     | .     | T     |
| 486395                        | .    | T    | .    | .    | .    | .    | .    | .    | .    | .    | .    | .    | .    | .    | A    | .    | .    | C    | .    | .    | .    | .    | .     | .     | .     | .     | .     | .     |
| 486398                        | .    | .    | .    | .    | .    | .    | .    | .    | .    | .    | .    | .    | .    | .    | A    | .    | .    | .    | .    | .    | .    | .    | .     | .     | .     | .     | .     | T     |
| 486399                        | .    | .    | .    | .    | .    | .    | .    | .    | .    | .    | .    | .    | .    | .    | A    | .    | .    | .    | .    | .    | .    | .    | .     | .     | .     | .     | .     | T     |
| 486400                        | .    | .    | .    | .    | .    | .    | .    | .    | .    | .    | .    | .    | .    | .    | A    | .    | .    | .    | .    | .    | .    | T    | .     | .     | A     | .     | .     | .     |
| 486408                        | .    | .    | .    | .    | .    | .    | .    | .    | .    | .    | .    | .    | .    | .    | A    | .    | .    | .    | .    | .    | .    | .    | .     | .     | .     | .     | .     | .     |
| 486409                        | .    | .    | .    | .    | .    | .    | .    | .    | .    | .    | .    | .    | .    | .    | A    | .    | A    | .    | .    | .    | .    | .    | .     | .     | .     | .     | .     | .     |
| 516940                        | .    | .    | .    | .    | .    | .    | .    | .    | .    | .    | .    | .    | .    | .    | A    | .    | .    | .    | .    | .    | .    | .    | .     | .     | .     | .     | .     | .     |
| 516942                        | .    | .    | .    | .    | .    | .    | .    | .    | .    | .    | .    | .    | .    | .    | A    | .    | .    | .    | .    | .    | .    | .    | .     | .     | .     | .     | .     | .     |
| 516943                        | .    | .    | .    | .    | .    | .    | .    | .    | .    | .    | .    | .    | .    | .    | A    | .    | .    | .    | .    | .    | .    | .    | .     | .     | .     | .     | .     | .     |
| 516974                        | .    | .    | .    | T    | .    | .    | .    | A    | .    | .    | .    | .    | .    | .    | .    | .    | .    | .    | .    | .    | .    | .    | .     | .     | .     | T     | .     | .     |
| 528382                        | .    | .    | .    | .    | C    | .    | .    | .    | .    | .    | .    | .    | .    | .    | A    | .    | .    | .    | .    | .    | .    | .    | .     | .     | .     | .     | .     | .     |
| 528383                        | .    | .    | .    | .    | C    | .    | .    | .    | .    | .    | .    | .    | .    | .    | A    | .    | .    | .    | .    | .    | .    | .    | .     | .     | .     | .     | .     | .     |
| 528384                        | .    | .    | .    | .    | C    | .    | .    | .    | .    | .    | .    | .    | .    | .    | A    | .    | .    | .    | .    | .    | .    | .    | .     | .     | .     | .     | .     | .     |
| 528385                        | .    | .    | .    | .    | C    | .    | .    | .    | .    | .    | .    | .    | .    | .    | A    | .    | .    | .    | .    | .    | .    | .    | .     | .     | .     | .     | .     | .     |

Supplementary File 1: Details of asymptomatic samples used in the study

| Mutational Site               | 16396 | 16732 | 17403 | 17894 | 17964 | 19073 | 20048 | 20134 | 21234 | 21699 | 21701 | 21792 | 21824 | 22216 | 22988 | 23403 | 23441 | 23442 | 23868 | 23929 | 24400 | 24812 | 24835 | 25006 |
|-------------------------------|-------|-------|-------|-------|-------|-------|-------|-------|-------|-------|-------|-------|-------|-------|-------|-------|-------|-------|-------|-------|-------|-------|-------|-------|
| Reference Nt<br>(NC_045512.2) | G     | T     | C     | C     | G     | A     | T     | G     | C     | C     | G     | A     | G     | G     | G     | A     | G     | A     | G     | C     | A     | G     | T     | C     |
| Genome ID                     |       |       |       |       |       |       |       |       |       |       |       |       |       |       |       |       |       |       |       |       |       |       |       |       |
| 431102                        | .     | .     | .     | .     | .     | .     | .     | .     | .     | .     | .     | .     | .     | .     | .     | G     | .     | .     | .     | .     | .     | .     | .     | .     |
| 436157                        | .     | T     | .     | .     | .     | .     | .     | .     | .     | .     | .     | .     | .     | .     | .     | .     | .     | .     | .     | T     | .     | .     | .     | .     |
| 454560                        | .     | .     | .     | T     | .     | .     | .     | .     | .     | .     | .     | .     | .     | .     | .     | G     | .     | .     | .     | .     | .     | .     | .     | .     |
| 454561                        | .     | .     | .     | .     | .     | A     | .     | .     | .     | .     | .     | .     | .     | .     | .     | .     | .     | .     | .     | T     | .     | .     | .     | .     |
| 479493                        | .     | .     | .     | .     | .     | .     | .     | .     | .     | .     | .     | .     | .     | .     | A     | G     | .     | .     | .     | .     | .     | .     | .     | .     |
| 479520                        | .     | .     | .     | .     | .     | .     | .     | .     | .     | .     | .     | .     | .     | .     | .     | .     | .     | .     | .     | T     | .     | .     | .     | .     |
| 479540                        | .     | .     | .     | .     | .     | .     | .     | .     | A     | .     | .     | .     | .     | .     | .     | G     | .     | .     | .     | .     | .     | .     | .     | .     |
| 479544                        | .     | .     | T     | .     | .     | .     | .     | .     | .     | T     | A     | .     | .     | .     | .     | G     | .     | .     | .     | .     | G     | .     | G     | .     |
| 479547                        | .     | .     | .     | .     | .     | .     | .     | .     | .     | .     | .     | .     | .     | .     | .     | G     | .     | .     | .     | .     | .     | .     | .     | .     |
| 479552                        | .     | .     | .     | .     | .     | .     | T     | .     | .     | .     | .     | .     | .     | T     | .     | G     | .     | .     | T     | .     | .     | .     | .     | .     |
| 486382                        | .     | T     | .     | .     | .     | .     | .     | .     | .     | .     | .     | .     | .     | .     | .     | .     | .     | .     | .     | T     | .     | .     | .     | .     |
| 486383                        | .     | .     | .     | .     | .     | .     | .     | .     | .     | .     | .     | .     | .     | .     | .     | G     | .     | .     | .     | .     | .     | .     | .     | .     |
| 486388                        | .     | .     | .     | .     | .     | .     | .     | .     | .     | .     | .     | .     | .     | .     | .     | .     | .     | .     | .     | T     | .     | .     | .     | .     |
| 486389                        | .     | .     | .     | .     | .     | .     | .     | .     | .     | .     | T     | .     | .     | .     | .     | .     | .     | .     | .     | T     | .     | T     | .     | T     |
| 486392                        | G     | .     | .     | .     | .     | .     | .     | .     | .     | .     | .     | .     | .     | .     | .     | .     | .     | .     | .     | T     | .     | .     | .     | .     |
| 486394                        | .     | .     | .     | .     | .     | .     | .     | .     | .     | .     | .     | .     | .     | .     | .     | .     | .     | .     | .     | T     | .     | .     | .     | .     |
| 486395                        | .     | .     | .     | .     | .     | .     | .     | .     | .     | .     | .     | .     | .     | .     | .     | .     | .     | .     | .     | T     | .     | .     | .     | .     |
| 486398 A                      | .     | .     | .     | .     | .     | .     | .     | .     | .     | .     | .     | .     | .     | .     | .     | .     | C     | C     | .     | T     | .     | .     | .     | .     |
| 486399                        | .     | .     | .     | .     | .     | .     | .     | .     | .     | .     | .     | .     | .     | .     | .     | .     | .     | .     | .     | T     | .     | .     | .     | .     |
| 486400                        | .     | .     | .     | .     | G     | .     | .     | .     | .     | .     | .     | .     | .     | .     | .     | .     | .     | .     | .     | T     | .     | .     | .     | .     |
| 486408                        | .     | .     | .     | .     | .     | .     | .     | .     | .     | .     | T     | .     | .     | .     | .     | .     | .     | .     | .     | T     | .     | T     | .     | T     |
| 486409                        | .     | .     | .     | .     | .     | .     | .     | .     | .     | .     | T     | C     | .     | .     | .     | .     | .     | .     | .     | T     | .     | T     | .     | T     |
| 516940                        | .     | .     | .     | .     | .     | .     | .     | .     | .     | .     | .     | .     | .     | .     | .     | .     | .     | .     | .     | T     | .     | .     | .     | .     |
| 516942                        | .     | .     | .     | .     | .     | .     | .     | .     | .     | .     | .     | .     | .     | .     | .     | .     | .     | .     | .     | T     | .     | .     | .     | .     |
| 516943                        | .     | .     | .     | .     | .     | .     | .     | .     | .     | .     | .     | .     | .     | .     | .     | .     | .     | .     | .     | T     | .     | .     | .     | .     |
| 516974                        | .     | .     | .     | .     | .     | .     | .     | .     | .     | .     | .     | .     | .     | .     | .     | G     | .     | .     | .     | .     | .     | .     | .     | .     |
| 528382                        | .     | .     | .     | .     | .     | .     | .     | .     | .     | .     | .     | .     | .     | .     | .     | .     | .     | .     | .     | T     | .     | .     | .     | .     |
| 528383                        | .     | .     | .     | .     | .     | .     | .     | .     | .     | .     | .     | .     | .     | .     | .     | .     | .     | .     | .     | T     | .     | .     | .     | .     |
| 528384                        | .     | .     | .     | .     | .     | .     | .     | .     | .     | .     | .     | .     | .     | .     | .     | .     | .     | .     | .     | T     | .     | .     | .     | .     |
| 528385                        | .     | .     | .     | .     | .     | .     | .     | .     | .     | .     | .     | .     | .     | .     | .     | .     | .     | .     | .     | T     | .     | .     | .     | .     |

Supplementary File 1: Details of asymptomatic samples used in the study

| Mutational Site               | 25207 | 25437 | 25546 | 25588 | 26356 | 26358 | 26467 | 27676 | 27915 | 28188 | 28300 | 28311 | 28857 | 28868 | 28881 | 28882 | 28883 | 28946 | 29077 | 29742 |   |
|-------------------------------|-------|-------|-------|-------|-------|-------|-------|-------|-------|-------|-------|-------|-------|-------|-------|-------|-------|-------|-------|-------|---|
| Reference Nt<br>(NC_045512.2) | C     | G     | C     | A     | C     | A     | G     | G     | G     | G     | G     | C     | G     | C     | G     | G     | G     | G     | C     | G     |   |
| Genome ID                     |       |       |       |       |       |       |       |       |       |       |       |       |       |       |       |       |       |       |       |       |   |
| 431102                        | .     | .     | .     | .     | .     | .     | .     | .     | .     | .     | .     | .     | .     | .     | .     | .     | .     | .     | .     | .     | . |
| 436157                        | .     | .     | .     | .     | .     | T     | .     | .     | .     | .     | T     | .     | .     | .     | .     | .     | .     | .     | .     | .     | . |
| 454560                        | .     | .     | .     | A     | .     | .     | .     | .     | .     | .     | .     | .     | .     | .     | .     | .     | .     | .     | .     | .     | . |
| 454561                        | .     | .     | .     | .     | .     | .     | .     | .     | .     | .     | .     | T     | .     | .     | .     | .     | .     | .     | .     | .     | . |
| 479493                        | .     | .     | .     | .     | .     | .     | .     | .     | .     | .     | .     | .     | .     | .     | A     | A     | C     | .     | .     | .     | . |
| 479520                        | .     | .     | .     | .     | .     | .     | .     | .     | .     | .     | .     | T     | .     | .     | .     | .     | .     | .     | .     | .     | . |
| 479540                        | .     | .     | .     | .     | .     | .     | A     | .     | .     | .     | .     | .     | .     | .     | A     | A     | C     | .     | .     | .     | . |
| 479544 T                      | .     | .     | .     | .     | .     | .     | .     | .     | .     | .     | .     | .     | T     | .     | A     | A     | C     | .     | .     | .     | . |
| 479547                        | .     | .     | .     | .     | .     | .     | .     | .     | .     | .     | .     | .     | .     | .     | A     | A     | C     | .     | .     | .     | . |
| 479552                        | .     | .     | .     | T     | T     | .     | .     | .     | .     | .     | .     | .     | .     | .     | A     | A     | C     | .     | .     | .     | . |
| 486382                        | .     | .     | .     | .     | .     | .     | .     | .     | .     | .     | .     | T     | .     | .     | .     | .     | .     | .     | .     | .     | . |
| 486383                        | .     | .     | .     | .     | .     | .     | .     | .     | .     | .     | .     | .     | .     | .     | .     | .     | .     | .     | .     | .     | . |
| 486388                        | .     | .     | .     | .     | .     | .     | .     | .     | .     | C     | .     | T     | .     | .     | .     | .     | .     | .     | .     | .     | . |
| 486389                        | .     | A     | .     | .     | .     | .     | .     | .     | .     | .     | .     | T     | .     | .     | .     | .     | .     | .     | .     | .     | . |
| 486392                        | .     | .     | .     | .     | .     | .     | .     | .     | .     | .     | .     | T     | .     | .     | .     | .     | .     | .     | .     | .     | . |
| 486394                        | T     | .     | .     | .     | .     | .     | .     | .     | .     | .     | .     | T     | .     | .     | .     | .     | .     | .     | .     | .     | . |
| 486395                        | .     | .     | .     | .     | .     | .     | .     | .     | .     | .     | .     | T     | .     | .     | .     | .     | .     | .     | .     | .     | . |
| 486398                        | T     | .     | .     | .     | .     | .     | .     | .     | .     | .     | .     | T     | .     | .     | .     | .     | .     | T     | .     | .     | . |
| 486399                        | T     | .     | .     | .     | .     | .     | .     | .     | .     | .     | .     | T     | .     | .     | .     | .     | .     | .     | .     | .     | . |
| 486400                        | .     | .     | T     | .     | .     | .     | .     | .     | T     | .     | T     | .     | .     | T     | .     | .     | .     | .     | T     | T     | . |
| 486408                        | .     | A     | .     | .     | .     | .     | .     | .     | .     | .     | .     | T     | .     | .     | .     | .     | .     | .     | .     | .     | . |
| 486409                        | .     | A     | .     | .     | .     | .     | .     | .     | .     | .     | .     | T     | .     | .     | .     | .     | .     | .     | .     | .     | . |
| 516940                        | .     | .     | .     | .     | .     | .     | .     | .     | .     | .     | .     | T     | .     | .     | .     | .     | .     | .     | .     | .     | . |
| 516942                        | .     | .     | .     | .     | .     | .     | .     | .     | .     | .     | .     | T     | .     | .     | .     | .     | .     | .     | .     | .     | . |
| 516943                        | .     | .     | .     | .     | .     | .     | .     | .     | .     | .     | .     | T     | .     | .     | .     | .     | .     | .     | .     | .     | . |
| 516974                        | .     | .     | .     | .     | .     | .     | .     | .     | .     | .     | .     | .     | .     | .     | A     | A     | C     | .     | .     | .     | . |
| 528382                        | .     | .     | .     | .     | .     | .     | .     | .     | .     | .     | .     | T     | .     | .     | .     | .     | .     | .     | .     | .     | . |
| 528383                        | .     | .     | .     | .     | .     | .     | .     | .     | .     | .     | .     | T     | .     | .     | .     | .     | .     | .     | .     | .     | . |
| 528384                        | .     | .     | .     | .     | .     | .     | .     | .     | .     | .     | .     | T     | .     | .     | .     | .     | .     | .     | .     | .     | . |
| 528385                        | .     | .     | .     | .     | .     | .     | .     | .     | .     | .     | .     | T     | .     | .     | .     | .     | .     | .     | .     | .     | . |































































































































































| Supplementary files 3: Localization of variants affecting amino acid sequence in studied SARS-Cov-2 genomes |               |                 |              |             |               |                  |         |               |                                                   |              |                           |
|-------------------------------------------------------------------------------------------------------------|---------------|-----------------|--------------|-------------|---------------|------------------|---------|---------------|---------------------------------------------------|--------------|---------------------------|
| S No                                                                                                        | Variable Site | Mutational Site | Substitution | AA Position | Gene Location | Protein Location | variant | Variant Class | Protein Annotation                                | Variant Name | Sum of Mutation Incidence |
| 1                                                                                                           | Pi            | 94              | G-T          | None        | 5UTR          | 5UTR             | 94      | extragenic    | NA                                                | 5UTR-94      | 2                         |
| 2                                                                                                           | Pi            | 106             | C-T          | None        | 5UTR          | 5UTR             | 106     | extragenic    | NA                                                | 5UTR-106     | 4                         |
| 3                                                                                                           | Singleton     | 110             | C-T          | None        | 5UTR          | 5UTR             | 110     | extragenic    | NA                                                | 5UTR-110     | 1                         |
| 4                                                                                                           | Singleton     | 187             | A-G          | None        | 5UTR          | 5UTR             | 187     | extragenic    | NA                                                | 5UTR-187     | 1                         |
| 5                                                                                                           | Singleton     | 203             | C-T          | None        | 5UTR          | 5UTR             | 203     | extragenic    | NA                                                | 5UTR-203     | 1                         |
| 6                                                                                                           | Singleton     | 204             | G-T          | None        | 5UTR          | 5UTR             | 204     | extragenic    | NA                                                | 5UTR-204     | 1                         |
| 7                                                                                                           | Pi            | 218             | C-T          | None        | 5UTR          | 5UTR             | 218     | extragenic    | NA                                                | 5UTR-218     | 2                         |
| 8                                                                                                           | Pi            | 219             | G-T          | None        | 5UTR          | 5UTR             | 219     | extragenic    | NA                                                | 5UTR-219     | 4                         |
| 9                                                                                                           | Singleton     | 292             | C-T          | None        | ORF1a         | NSP1             | N9N     | SNP silent    | Leader protein                                    | NSP1.N9N     | 1                         |
| 10                                                                                                          | Singleton     | 335             | C-T          | R24C        | ORF1a         | NSP1             | R24C    | SNP           | Leader protein                                    | NSP1.R24C    | 1                         |
| 11                                                                                                          | Singleton     | 377             | G-T          | V38F        | ORF1a         | NSP1             | V38F    | SNP           | Leader protein                                    | NSP1.V38F    | 1                         |
| 12                                                                                                          | Singleton     | 388             | C-A          | None        | ORF1a         | NSP1             | E41E    | SNP silent    | Leader protein                                    | NSP1.E41E    | 1                         |
| 13                                                                                                          | Pi            | 506             | C-T          | H81Y        | ORF1a         | NSP1             | H81Y    | SNP           | Leader protein                                    | NSP1.H81Y    | 2                         |
| 14                                                                                                          | Singleton     | 583             | C-T          | None        | ORF1a         | NSP1             | V106V   | SNP silent    | Leader protein                                    | NSP1.V106V   | 1                         |
| 15                                                                                                          | Singleton     | 589             | C-A          | None        | ORF1a         | NSP1             | V108V   | SNP silent    | Leader protein                                    | NSP1.V108V   | 1                         |
| 16                                                                                                          | Pi            | 635             | C-T          | R124C       | ORF1a         | NSP1             | R124C   | SNP           | Leader protein                                    | NSP1.R124C   | 2                         |
| 17                                                                                                          | Singleton     | 643             | C-T          | None        | ORF1a         | NSP1             | N126N   | SNP silent    | Leader protein                                    | NSP1.N126N   | 1                         |
| 18                                                                                                          | Singleton     | 674             | G-T          | G137C       | ORF1a         | NSP1             | G137C   | SNP           | Leader protein                                    | NSP1.G137C   | 1                         |
| 19                                                                                                          | Singleton     | 697             | C-T          | None        | ORF1a         | NSP1             | D144D   | SNP silent    | Leader protein                                    | NSP1.D144D   | 1                         |
| 20                                                                                                          | Singleton     | 706             | C-A          | D147E       | ORF1a         | NSP1             | D147E   | SNP           | Leader protein                                    | NSP1.D147E   | 1                         |
| 21                                                                                                          | Pi            | 771             | T-C          | V169A       | ORF1a         | NSP1             | V169A   | SNP           | Leader protein                                    | NSP1.V169A   | 4                         |
| 22                                                                                                          | Singleton     | 784             | C-T          | None        | ORF1a         | NSP1             | L173L   | SNP silent    | Leader protein                                    | NSP1.L173L   | 1                         |
| 23                                                                                                          | Singleton     | 832             | C-T          | None        | ORF1a         | NSP2             | N9N     | SNP silent    | Non-Structural protein 2                          | NSP2.N9N     | 1                         |
| 24                                                                                                          | Singleton     | 835             | C-T          | None        | ORF1a         | NSP2             | F10F    | SNP silent    | Non-Structural protein 2                          | NSP2.F10F    | 1                         |
| 25                                                                                                          | Singleton     | 840             | G-A          | G192D       | ORF1a         | NSP2             | G12D    | SNP           | Non-Structural protein 2                          | NSP2.G12D    | 1                         |
| 26                                                                                                          | Singleton     | 851             | T-C          | Y196H       | ORF1a         | NSP2             | Y16H    | SNP           | Non-Structural protein 2                          | NSP2.Y16H    | 1                         |
| 27                                                                                                          | Pi            | 875             | C-T          | L204F       | ORF1a         | NSP2             | L24F    | SNP           | Non-Structural protein 2                          | NSP2.L24F    | 3                         |
| 28                                                                                                          | Pi            | 894             | T-C          | None        | ORF1a         | NSP2             | P96P    | SNP silent    | Non-Structural protein 2                          | NSP2.P96P    | 3                         |
| 29                                                                                                          | Singleton     | 1102            | C-T          | None        | ORF1a         | NSP2             | S99S    | SNP silent    | Non-Structural protein 2                          | NSP2.S99S    | 1                         |
| 30                                                                                                          | Singleton     | 1123            | A-G          | None        | ORF1a         | NSP2             | P106P   | SNP silent    | Non-Structural protein 2                          | NSP2.P106P   | 1                         |
| 31                                                                                                          | Singleton     | 1204            | C-T          | None        | ORF1a         | NSP2             | N133N   | SNP silent    | Non-Structural protein 2                          | NSP2.N133N   | 1                         |
| 32                                                                                                          | Singleton     | 1267            | C-T          | None        | ORF1a         | NSP2             | G154G   | SNP silent    | Non-Structural protein 2                          | NSP2.G154G   | 1                         |
| 33                                                                                                          | Singleton     | 1278            | A-G          | K338R       | ORF1a         | NSP2             | K158R   | SNP           | Non-Structural protein 2                          | NSP2.K158R   | 1                         |
| 34                                                                                                          | Singleton     | 1912            | C-T          | None        | ORF1a         | NSP2             | S369S   | SNP silent    | Non-Structural protein 2                          | NSP2.S369S   | 1                         |
| 35                                                                                                          | Singleton     | 2040            | C-T          | T592I       | ORF1a         | NSP2             | T412I   | SNP           | Non-Structural protein 2                          | NSP2.T412I   | 1                         |
| 36                                                                                                          | Singleton     | 2111            | A-T          | I616F       | ORF1a         | NSP2             | I466F   | SNP           | Non-Structural protein 2                          | NSP2.I466F   | 1                         |
| 37                                                                                                          | Singleton     | 2127            | A-C          | Y621S       | ORF1a         | NSP2             | Y441S   | SNP           | Non-Structural protein 2                          | NSP2.Y441S   | 1                         |
| 38                                                                                                          | Singleton     | 2141            | C-A          | P626T       | ORF1a         | NSP2             | P446T   | SNP           | Non-Structural protein 2                          | NSP2.P446T   | 1                         |
| 39                                                                                                          | Pi            | 2143            | C-T          | None        | ORF1a         | NSP2             | P446P   | SNP silent    | Non-Structural protein 2                          | NSP2.P446P   | 11                        |
| 40                                                                                                          | Singleton     | 2164            | G-T          | E633D       | ORF1a         | NSP2             | E453D   | SNP           | Non-Structural protein 2                          | NSP2.E453D   | 1                         |
| 41                                                                                                          | Singleton     | 2200            | T-C          | None        | ORF1a         | NSP2             | G465G   | SNP silent    | Non-Structural protein 2                          | NSP2.G465G   | 1                         |
| 42                                                                                                          | Singleton     | 2236            | T-C          | None        | ORF1a         | NSP2             | C477C   | SNP silent    | Non-Structural protein 2                          | NSP2.C477C   | 1                         |
| 43                                                                                                          | Singleton     | 2249            | G-A          | G482R       | ORF1a         | NSP2             | G482R   | SNP           | Non-Structural protein 2                          | NSP2.G482R   | 1                         |
| 44                                                                                                          | Singleton     | 2277            | T-C          | I671T       | ORF1a         | NSP2             | I491T   | SNP           | Non-Structural protein 2                          | NSP2.I491T   | 1                         |
| 45                                                                                                          | Singleton     | 2309            | G-T          | V682L       | ORF1a         | NSP2             | V502L   | SNP           | Non-Structural protein 2                          | NSP2.V502L   | 1                         |
| 46                                                                                                          | Singleton     | 2388            | C-T          | T708I       | ORF1a         | NSP2             | T528I   | SNP           | Non-Structural protein 2                          | NSP2.T528I   | 1                         |
| 47                                                                                                          | Singleton     | 2393            | G-T          | V710F       | ORF1a         | NSP2             | V530F   | SNP           | Non-Structural protein 2                          | NSP2.V530F   | 1                         |
| 48                                                                                                          | Pi            | 2480            | A-G          | I739V       | ORF1a         | NSP2             | I59V    | SNP           | Non-Structural protein 2                          | NSP2.I59V    | 2                         |
| 49                                                                                                          | Singleton     | 2485            | C-T          | None        | ORF1a         | NSP2             | I560I   | SNP silent    | Non-Structural protein 2                          | NSP2.I560I   | 1                         |
| 50                                                                                                          | Singleton     | 2518            | G-T          | None        | ORF1a         | NSP2             | V571V   | SNP silent    | Non-Structural protein 2                          | NSP2.V571V   | 1                         |
| 51                                                                                                          | Pi            | 2558            | C-T          | P765S       | ORF1a         | NSP2             | P585S   | SNP           | Non-Structural protein 2                          | NSP2.P585S   | 3                         |
| 52                                                                                                          | Pi            | 2836            | C-T          | None        | ORF1a         | NSP3             | C39C    | SNP silent    | Predicted phosphoesterase, papain-like proteinase | NSP3.C39C    | 51                        |
| 53                                                                                                          | Singleton     | 2879            | G-A          | A872T       | ORF1a         | NSP3             | A54T    | SNP           | Predicted phosphoesterase, papain-like proteinase | NSP3.A54T    | 1                         |
| 54                                                                                                          | Singleton     | 2910            | C-T          | T382I       | ORF1a         | NSP3             | T64I    | SNP           | Predicted phosphoesterase, papain-like proteinase | NSP3.T64I    | 1                         |
| 55                                                                                                          | Pi            | 3039            | A-G          | Y925C       | ORF1a         | NSP3             | Y107C   | SNP           | Predicted phosphoesterase, papain-like proteinase | NSP3.Y107C   | 3                         |
| 56                                                                                                          | Pi            | 3054            | A-G          | D930G       | ORF1a         | NSP3             | D112G   | SNP           | Predicted phosphoesterase, papain-like proteinase | NSP3.D112G   | 2                         |
| 57                                                                                                          | Pi            | 3085            | G-T          | E940D       | ORF1a         | NSP3             | E122D   | SNP           | Predicted phosphoesterase, papain-like proteinase | NSP3.E122D   | 2                         |
| 58                                                                                                          | Singleton     | 3176            | C-T          | P971S       | ORF1a         | NSP3             | P153S   | SNP           | Predicted phosphoesterase, papain-like proteinase | NSP3.P153S   | 1                         |
| 59                                                                                                          | Singleton     | 3231            | G-T          | G989V       | ORF1a         | NSP3             | G171V   | SNP           | Predicted phosphoesterase, papain-like proteinase | NSP3.G171V   | 1                         |
| 60                                                                                                          | Singleton     | 3351            | G-T          | S1029I      | ORF1a         | NSP3             | S211I   | SNP           | Predicted phosphoesterase, papain-like proteinase | NSP3.S211I   | 1                         |
| 61                                                                                                          | Singleton     | 3372            | A-G          | D1036G      | ORF1a         | NSP3             | D218G   | SNP           | Predicted phosphoesterase, papain-like proteinase | NSP3.D218G   | 1                         |
| 62                                                                                                          | Pi            | 3426            | C-T          | None        | ORF1a         | NSP3             | P236I   | SNP           | Predicted phosphoesterase, papain-like proteinase | NSP3.P236I   | 1                         |
| 63                                                                                                          | Singleton     | 3467            | G-T          | Stop.Cat    | ORF1a         | NSP3             | G250*   | SNP stop      | Predicted phosphoesterase, papain-like proteinase | NSP3.G250*   | 2                         |
| 64                                                                                                          | Singleton     | 3471            | G-A          | G1069E      | ORF1a         | NSP3             | G251E   | SNP           | Predicted phosphoesterase, papain-like proteinase | NSP3.G251E   | 1                         |
| 65                                                                                                          | Pi            | 3472            | A-G          | None        | ORF1a         | NSP3             | G251G   | SNP silent    | Predicted phosphoesterase, papain-like proteinase | NSP3.G251G   | 4                         |
| 66                                                                                                          | Singleton     | 3514            | G-T          | M1083I      | ORF1a         | NSP3             | M265I   | SNP           | Predicted phosphoesterase, papain-like proteinase | NSP3.M265I   | 1                         |
| 67                                                                                                          | Singleton     | 3517            | A-G          | None        | ORF1a         | NSP3             | Q266Q   | SNP silent    | Predicted phosphoesterase, papain-like proteinase | NSP3.Q266Q   | 1                         |
| 68                                                                                                          | Singleton     | 3604            | C-T          | None        | ORF1a         | NSP3             | H295H   | SNP silent    | Predicted phosphoesterase, papain-like proteinase | NSP3.H295H   | 1                         |
| 69                                                                                                          | Pi            | 3634            | C-T          | None        | ORF1a         | NSP3             | N305N   | SNP silent    | Predicted phosphoesterase, papain-like proteinase | NSP3.N305N   | 23                        |
| 70                                                                                                          | Pi            | 3693            | H1141Y       | ORF1a       | NSP3          | NSP3             | H123Y   | SNP           | Predicted phosphoesterase, papain-like proteinase | NSP3.H123Y   | 2                         |
| 71                                                                                                          | Pi            | 3737            | C-T          | P340S       | ORF1a         | NSP3             | P340S   | SNP           | Predicted phosphoesterase, papain-like proteinase | NSP3.P340S   | 2                         |
| 72                                                                                                          | Singleton     | 3784            | C-T          | None        | ORF1a         | NSP3             | V355V   | SNP silent    | Predicted phosphoesterase, papain-like proteinase | NSP3.V355V   | 1                         |
| 73                                                                                                          | Pi            | 4067            | G-A          | A1268T      | ORF1a         | NSP3             | A450T   | SNP           | Predicted phosphoesterase, papain-like proteinase | NSP3.A450T   | 2                         |
| 74                                                                                                          | Pi            | 4084            | C-T          | None        | ORF1a         | NSP3             | D455D   | SNP silent    | Predicted phosphoesterase, papain-like proteinase | NSP3.D455D   | 13                        |
| 75                                                                                                          | Singleton     | 4158            | C-T          | A1298V      | ORF1a         | NSP3             | A480V   | SNP           | Predicted phosphoesterase, papain-like proteinase | NSP3.A480V   | 1                         |
| 76                                                                                                          | Singleton     | 4182            | C-T          | A1306V      | ORF1a         | NSP3             | A488V   | SNP           | Predicted phosphoesterase, papain-like proteinase | NSP3.A488V   | 1                         |
| 77                                                                                                          | Singleton     | 4246            | C-T          | None        | ORF1a         | NSP3             | T509T   | SNP silent    | Predicted phosphoesterase, papain-like proteinase | NSP3.T509T   | 1                         |
| 78                                                                                                          | Singleton     | 4300            | G-T          | None        | ORF1a         | NSP3             | V527V   | SNP silent    | Predicted phosphoesterase, papain-like proteinase | NSP3.V527V   | 1                         |
| 79                                                                                                          | Singleton     | 4345            | C-T          | None        | ORF1a         | NSP3             | I542I   | SNP silent    | Predicted phosphoesterase, papain-like proteinase | NSP3.I542I   | 1                         |
| 80                                                                                                          | Pi            | 4354            | G-A          | None        | ORF1a         | NSP3             | E545E   | SNP silent    | Predicted phosphoesterase, papain-like proteinase | NSP3.E545E   | 5                         |
| 81                                                                                                          | Pi            | 4372            | A-G          | None        | ORF1a         | NSP3             | G551G   | SNP silent    | Predicted phosphoesterase, papain-like proteinase | NSP3.G551G   | 5                         |
| 82                                                                                                          | Pi            | 4444            | G-T          | None        | ORF1a         | NSP3             | V575V   | SNP silent    | Predicted phosphoesterase, papain-like proteinase | NSP3.V575V   | 5                         |
| 83                                                                                                          | Pi            | 4679            | C-T          | P1472S      | ORF1a         | NSP3             | P654S   | SNP           | Predicted phosphoesterase, papain-like proteinase | NSP3.P654S   | 3                         |
| 84                                                                                                          | Pi            | 4809            | C-T          | S1515F      | ORF1a         | NSP3             | S697F   | SNP           | Predicted phosphoesterase, papain-like proteinase | NSP3.S697F   | 14                        |
| 85                                                                                                          | Pi            | 4866            | G-T          | S1534I      | ORF1a         | NSP3             | S716I   | SNP           | Predicted phosphoesterase, papain-like proteinase | NSP3.S716I   | 6                         |
| 86                                                                                                          | Pi            | 4903            | C-A          | T1543K      | ORF1a         | NSP3             | T725K   | SNP           | Predicted phosphoesterase, papain-like proteinase | NSP3.T725K   | 3                         |
| 87                                                                                                          | Singleton     | 4903            | A-G          | None        | ORF1a         | NSP3             | L128I   | SNP silent    | Predicted phosphoesterase, papain-like proteinase | NSP3.L128I   | 1                         |
| 88                                                                                                          | Pi            | 4965            | C-T          | T1567I      | ORF1a         | NSP3             | T749I   | SNP           | Predicted phosphoesterase, papain-like proteinase | NSP3.T749I   | 1                         |
| 89                                                                                                          | Pi            | 5029            | G-T          | M1588I      | ORF1a         | NSP3             | M770I   | SNP           | Predicted phosphoesterase, papain-like proteinase | NSP3.M770I   | 2                         |
| 90                                                                                                          | Pi            | 5062            | G-A          | None        | ORF1a         | NSP3             | L781L   | SNP silent    | Predicted phosphoesterase, papain-like proteinase | NSP3.L781L   | 1                         |
| 91                                                                                                          | Pi            | 5139            | A-T          | D1625V      | ORF1a         | NSP3             | D807V   | SNP           | Predicted phosphoesterase, papain-like proteinase | NSP3.D807V   | 2                         |
| 92                                                                                                          | Singleton     | 5140            | C-T          | D1625V      | ORF1a         | NSP3             | NSP3    | SNP           | Predicted phosphoesterase, papain-like proteinase | NSP3         | 1                         |
| 93                                                                                                          | Singleton     | 5210            | T-C          | V1629A      | ORF1a         | NSP3             | V811A   | SNP           | Predicted phosphoesterase, papain-like proteinase | NSP3.V811A   | 1                         |
| 94                                                                                                          | Singleton     | 5210            | G-T          | A1649S      | ORF1a         | NSP3             | A831S   | SNP           | Predicted phosphoesterase, papain-like proteinase | NSP3.A831S   | 1                         |
| 95                                                                                                          | Singleton     | 5289            | A-G          | Y1675C      | ORF1a         | NSP3             | Y857C   | SNP           | Predicted phosphoesterase, papain-like proteinase | NSP3.Y857C   | 1                         |
| 96                                                                                                          | Singleton     | 5462            | A-G          | S1733G      | ORF1a         | NSP3             | S915G   | SNP           | Predicted phosphoesterase, papain-like proteinase | NSP3.S915G   | 1                         |
| 97                                                                                                          | Singleton     | 5547            | C-T          | T1761I      | ORF1a         | NSP3             | T943I   | SNP           | Predicted phosphoesterase, papain-like proteinase | NSP3.T943I   | 1                         |
| 98                                                                                                          | Singleton     | 5593            | T-C          | None        | ORF1a         | NSP3             | Y958Y   | SNP silent    | Predicted phosphoesterase, papain-like proteinase | NSP3.Y958Y   | 1                         |
| 99                                                                                                          | Pi            | 5700            | C-A          | A1812D      | ORF1a         | NSP3             | A994D   | SNP           | Predicted phosphoesterase, papain-like proteinase | NSP3.A994D   | 29                        |
| 100                                                                                                         | Singleton     | 5730            | C-T          | T1822I      | ORF1a         | NSP3             | T1004I  | SNP           | Predicted phosphoesterase, papain-like proteinase | NSP3.T1004I  | 1                         |
| 101                                                                                                         | Singleton     | 5821            | A-G          | None        | ORF1a         | NSP3             | L1034L  | SNP silent    | Predicted phosphoesterase, papain-like proteinase | NSP3.L1034L  | 2                         |
| 102                                                                                                         | Singleton     | 5825            | A-G          | T1854A      | ORF1a         | NSP3             | T1036A  | SNP           | Predicted phosphoesterase, papain-like proteinase | NSP3.T1036A  | 1                         |
| 103                                                                                                         | Pi            | 5826            | C-T          | T1854I      | ORF1a         | NSP3             | T103I   | SNP           | Predicted phosphoesterase, papain-like proteinase | NSP3.T103I   | 2                         |
| 104                                                                                                         | Singleton     | 5846            | G-A          | G1861S      | ORF1a         | NSP3             | G1043S  | SNP           | Predicted phosphoesterase, papain-like proteinase | NSP3.G1043S  | 1                         |
| 105                                                                                                         | Singleton     | 5877            | A-C          | N1871T      | ORF1a         | NSP3             | N1053T  | SNP           | Predicted phosphoesterase, papain-like proteinase | NSP3.N1053T  | 1                         |
| 106                                                                                                         | Singleton     | 6040            | C-T          | None        | ORF1a         | NSP3             | F1107F  | SNP silent    | Predicted phosphoesterase, papain-like proteinase | NSP3.F1107F  | 1                         |
| 107                                                                                                         | Singleton     | 6145            | C-T          | None        | ORF1a         | NSP3             | F1142F  | SNP silent    | Predicted phosphoesterase, papain-like proteinase | NSP3.F1142F  | 1                         |
| 108                                                                                                         | Singleton     | 6183            | A-G          | K1973R      | ORF1a         | NSP3             | K1155R  | SNP           | Predicted phosphoesterase, papain-like proteinase | NSP3.K1155R  | 1                         |
| 109                                                                                                         | Singleton     | 6190            | C-T          | None        | ORF1a         | NSP3             | Y1157Y  | SNP silent    | Predicted phosphoesterase, papain-like proteinase | NSP3.Y1157Y  | 1                         |
| 110                                                                                                         | Singleton     | 6197            | T-C          | S1978P      | ORF1a         | NSP3             | S1160P  | SNP           | Predicted phosphoesterase, papain-like proteinase | NSP3.S1160P  | 1                         |
| 111                                                                                                         | Singleton     | 6220            | G-A          | None        | ORF1a         | NSP3             | L1167L  | SNP silent    | Predicted phosphoesterase, papain-like proteinase | NSP3.L1167L  | 1                         |
| 112                                                                                                         | Singleton     | 6308            | A-C          | S2103R      | ORF1a         | NSP3             | S1197R  | SNP           | Predicted phosphoesterase, papain-like proteinase | NSP3.S1197R  | 1                         |
| 113                                                                                                         | Singleton     | 6309            | G-A          | S2015K      | ORF1a         | NSP3             | S1197K  | SNP           | Predicted phosphoesterase, papain-like proteinase | NSP3.S1197K  | 1                         |
| 114                                                                                                         | Singleton     | 6350            | A-G          | K2029E      | ORF1a         | NSP3             | K1211E  | SNP           | Predicted phosphoesterase, papain-like proteinase |              |                           |

|     |           |       |     |        |        |        |        |            |                                                         |             |    |
|-----|-----------|-------|-----|--------|--------|--------|--------|------------|---------------------------------------------------------|-------------|----|
| 126 | Singleton | 6748  | A-G | None   | ORF1a  | NSP3   | L1343L | SNP silent | Predicted phosphoesterase, papain-like proteinase       | NSP3.L1343L | 1  |
| 127 | Singleton | 6925  | A-T | None   | ORF1a  | NSP3   | S1402S | SNP silent | Predicted phosphoesterase, papain-like proteinase       | NSP3.S1402S | 1  |
| 128 | Pi        | 6989  | T-C | S2242P | ORF1a  | NSP3   | S1424P | SNP        | Predicted phosphoesterase, papain-like proteinase       | NSP3.S1424P | 2  |
| 129 | Singleton | 7003  | A-G | None   | ORF1a  | NSP3   | S1428S | SNP silent | Predicted phosphoesterase, papain-like proteinase       | NSP3.S1428S | 1  |
| 130 | Singleton | 7011  | C-T | A2249V | ORF1a  | NSP3   | A143V  | SNP        | Predicted phosphoesterase, papain-like proteinase       | NSP3.A143V  | 1  |
| 131 | Singleton | 7086  | C-T | T2274I | ORF1a  | NSP3   | T1456I | SNP        | Predicted phosphoesterase, papain-like proteinase       | NSP3.T1456I | 1  |
| 132 | Singleton | 7164  | C-T | T2300I | ORF1a  | NSP3   | T1482I | SNP        | Predicted phosphoesterase, papain-like proteinase       | NSP3.T1482I | 1  |
| 133 | Singleton | 7173  | C-A | S2303Y | ORF1a  | NSP3   | S1485Y | SNP        | Predicted phosphoesterase, papain-like proteinase       | NSP3.S1485Y | 1  |
| 134 | Singleton | 7232  | T-G | L2323V | ORF1a  | NSP3   | L1505V | SNP        | Predicted phosphoesterase, papain-like proteinase       | NSP3.L1505V | 1  |
| 135 | Singleton | 7379  | G-A | V2372I | ORF1a  | NSP3   | V1554I | SNP        | Predicted phosphoesterase, papain-like proteinase       | NSP3.V1554I | 1  |
| 136 | Singleton | 7420  | C-T | None   | ORF1a  | NSP3   | I1567I | SNP silent | Predicted phosphoesterase, papain-like proteinase       | NSP3.I1567I | 1  |
| 137 | Singleton | 7675  | G-T | None   | ORF1a  | NSP3   | A1652A | SNP silent | Predicted phosphoesterase, papain-like proteinase       | NSP3.A1652A | 1  |
| 138 | Singleton | 7704  | C-T | P2480L | ORF1a  | NSP3   | P1662L | SNP        | Predicted phosphoesterase, papain-like proteinase       | NSP3.P1662L | 1  |
| 139 | Singleton | 7732  | C-T | None   | ORF1a  | NSP3   | I1671Y | SNP silent | Predicted phosphoesterase, papain-like proteinase       | NSP3.I1671Y | 1  |
| 140 | Singleton | 7823  | C-T | H2520Y | ORF1a  | NSP3   | H1702Y | SNP        | Predicted phosphoesterase, papain-like proteinase       | NSP3.H1702Y | 1  |
| 141 | Pi        | 7945  | C-T | None   | ORF1a  | NSP3   | Y1742Y | SNP silent | Predicted phosphoesterase, papain-like proteinase       | NSP3.Y1742Y | 3  |
| 142 | Singleton | 8043  | C-T | A2593V | ORF1a  | NSP3   | A1775V | SNP        | Predicted phosphoesterase, papain-like proteinase       | NSP3.A1775V | 1  |
| 143 | Pi        | 8080  | A-T | None   | ORF1a  | NSP3   | P1787P | SNP silent | Predicted phosphoesterase, papain-like proteinase       | NSP3.P1787P | 2  |
| 144 | Singleton | 8102  | G-T | V2613F | ORF1a  | NSP3   | V1795F | SNP        | Predicted phosphoesterase, papain-like proteinase       | NSP3.V1795F | 1  |
| 145 | Singleton | 8139  | C-T | S2625F | ORF1a  | NSP3   | S1807F | SNP        | Predicted phosphoesterase, papain-like proteinase       | NSP3.S1807F | 1  |
| 146 | Singleton | 8146  | C-T | None   | ORF1a  | NSP3   | D1809D | SNP silent | Predicted phosphoesterase, papain-like proteinase       | NSP3.D1809D | 1  |
| 147 | Singleton | 8151  | T-C | V2629A | ORF1a  | NSP3   | V1811A | SNP        | Predicted phosphoesterase, papain-like proteinase       | NSP3.V1811A | 1  |
| 148 | Singleton | 8247  | C-T | S2661F | ORF1a  | NSP3   | S1843F | SNP        | Predicted phosphoesterase, papain-like proteinase       | NSP3.S1843F | 1  |
| 149 | Pi        | 8296  | T-C | None   | ORF1a  | NSP3   | Y1859Y | SNP silent | Predicted phosphoesterase, papain-like proteinase       | NSP3.Y1859Y | 2  |
| 150 | Singleton | 8329  | T-A | None   | ORF1a  | NSP3   | L1870L | SNP silent | Predicted phosphoesterase, papain-like proteinase       | NSP3.L1870L | 1  |
| 151 | Singleton | 8336  | T-A | C2691S | ORF1a  | NSP3   | C1873S | SNP        | Predicted phosphoesterase, papain-like proteinase       | NSP3.C1873S | 1  |
| 152 | Pi        | 8460  | C-A | A2732D | ORF1a  | NSP3   | A1914D | SNP        | Predicted phosphoesterase, papain-like proteinase       | NSP3.A1914D | 2  |
| 153 | Singleton | 8560  | T-C | None   | ORF1a  | NSP4   | I2I    | SNP silent | Transmembrane protein                                   | NSP4.I2I    | 1  |
| 154 | Singleton | 8571  | G-T | W2769L | ORF1a  | NSP4   | W6L    | SNP        | Transmembrane protein                                   | NSP4.W6L    | 1  |
| 155 | Singleton | 8595  | C-T | T2777I | ORF1a  | NSP4   | T14I   | SNP        | Transmembrane protein                                   | NSP4.T14I   | 1  |
| 156 | Singleton | 8620  | C-T | L2781P | ORF1a  | NSP4   | L18P   | SNP        | Transmembrane protein                                   | NSP4.L18P   | 1  |
| 157 | Pi        | 8653  | G-T | M2796I | ORF1a  | NSP4   | M33I   | SNP        | Transmembrane protein                                   | NSP4.M33I   | 18 |
| 158 | Singleton | 8683  | C-T | None   | ORF1a  | NSP4   | I43I   | SNP silent | Transmembrane protein                                   | NSP4.I43I   | 1  |
| 159 | Singleton | 8756  | C-T | H2831Y | ORF1a  | NSP4   | H68Y   | SNP        | Transmembrane protein                                   | NSP4.H68Y   | 1  |
| 160 | Pi        | 8782  | C-T | None   | ORF1a  | NSP4   | S76S   | SNP silent | Transmembrane protein                                   | NSP4.S76S   | 33 |
| 161 | Pi        | 8917  | C-T | None   | ORF1a  | NSP4   | F121F  | SNP silent | Transmembrane protein                                   | NSP4.F121F  | 17 |
| 162 | Pi        | 8950  | C-T | None   | ORF1a  | NSP4   | I132I  | SNP silent | Transmembrane protein                                   | NSP4.I132I  | 2  |
| 163 | Singleton | 9226  | C-T | None   | ORF1a  | NSP4   | G224G  | SNP silent | Transmembrane protein                                   | NSP4.G224G  | 1  |
| 164 | Singleton | 9246  | C-T | A2994V | ORF1a  | NSP4   | A231V  | SNP        | Transmembrane protein                                   | NSP4.A231V  | 1  |
| 165 | Singleton | 9357  | T-A | F3031Y | ORF1a  | NSP4   | F268Y  | SNP        | Transmembrane protein                                   | NSP4.F268Y  | 1  |
| 166 | Pi        | 9389  | G-A | D3042N | ORF1a  | NSP4   | D279N  | SNP        | Transmembrane protein                                   | NSP4.D279N  | 4  |
| 167 | Pi        | 9438  | C-T | T3058I | ORF1a  | NSP4   | T295I  | SNP        | Transmembrane protein                                   | NSP4.T295I  | 7  |
| 168 | Singleton | 9477  | T-A | F3071Y | ORF1a  | NSP4   | F308Y  | SNP        | Transmembrane protein                                   | NSP4.F308Y  | 1  |
| 169 | Singleton | 9514  | A-G | None   | ORF1a  | NSP4   | L320L  | SNP silent | Transmembrane protein                                   | NSP4.L320L  | 1  |
| 170 | Pi        | 9628  | T-C | None   | ORF1a  | NSP4   | S358S  | SNP silent | Transmembrane protein                                   | NSP4.S358S  | 2  |
| 171 | Singleton | 9648  | G-C | A3143V | ORF1a  | NSP4   | W365*  | SNP stop   | Transmembrane protein                                   | NSP4.W365*  | 1  |
| 172 | Pi        | 9693  | C-T | A3143V | ORF1a  | NSP4   | A380V  | SNP        | Transmembrane protein                                   | NSP4.A380V  | 1  |
| 173 | Singleton | 9743  | T-C | Y3160H | ORF1a  | NSP4   | Y397H  | SNP        | Transmembrane protein                                   | NSP4.Y397H  | 1  |
| 174 | Singleton | 9746  | C-A | L3161I | ORF1a  | NSP4   | L398I  | SNP        | Transmembrane protein                                   | NSP4.L398I  | 1  |
| 175 | Singleton | 9799  | T-C | None   | ORF1a  | NSP4   | A415A  | SNP silent | Transmembrane protein                                   | NSP4.A415A  | 1  |
| 176 | Singleton | 9802  | G-T | None   | ORF1a  | NSP4   | A416A  | SNP silent | Transmembrane protein                                   | NSP4.A416A  | 1  |
| 177 | Singleton | 9857  | C-T | None   | ORF1a  | NSP4   | V434V  | SNP silent | Transmembrane protein                                   | NSP4.V434V  | 1  |
| 178 | Singleton | 9933  | C-T | T3223I | ORF1a  | NSP4   | T460I  | SNP        | Transmembrane protein                                   | NSP4.T460I  | 1  |
| 179 | Pi        | 10138 | C-T | None   | ORF1a  | NSP5   | N28N   | SNP silent | 3C-like proteinase                                      | NSP5.N28N   | 5  |
| 180 | Pi        | 10277 | G-T | L3338F | ORF1a  | NSP5   | L75F   | SNP        | 3C-like proteinase                                      | NSP5.L75F   | 3  |
| 181 | Singleton | 10321 | C-T | None   | ORF1a  | NSP5   | L89L   | SNP silent | 3C-like proteinase                                      | NSP5.L89L   | 1  |
| 182 | Singleton | 10339 | T-C | None   | ORF1a  | NSP5   | N95N   | SNP silent | 3C-like proteinase                                      | NSP5.N95N   | 1  |
| 183 | Pi        | 10369 | C-T | None   | ORF1a  | NSP5   | R105R  | SNP silent | 3C-like proteinase                                      | NSP5.R105R  | 2  |
| 184 | Singleton | 10401 | C-T | A379V  | ORF1a  | NSP5   | A116V  | SNP        | 3C-like proteinase                                      | NSP5.A116V  | 1  |
| 185 | Singleton | 10421 | T-C | S3386P | ORF1a  | NSP5   | S123P  | SNP        | 3C-like proteinase                                      | NSP5.S123P  | 1  |
| 186 | Singleton | 10434 | A-G | Q3390R | ORF1a  | NSP5   | Q127R  | SNP        | 3C-like proteinase                                      | NSP5.Q127R  | 1  |
| 187 | Singleton | 10448 | C-T | P3395S | ORF1a  | NSP5   | P132S  | SNP        | 3C-like proteinase                                      | NSP5.P132S  | 1  |
| 188 | Pi        | 10478 | A-C | N3405L | ORF1a  | NSP5   | N142L  | SNP        | 3C-like proteinase                                      | NSP5.N142L  | 5  |
| 189 | Pi        | 10479 | A-T | N3405L | ORF1a  | NSP5   | S254F  | SNP        | 3C-like proteinase                                      | NSP5.S254F  | 2  |
| 190 | Singleton | 10582 | C-T | None   | ORF1a  | NSP5   | D176D  | SNP silent | 3C-like proteinase                                      | NSP5.D176D  | 1  |
| 191 | Singleton | 10622 | A-G | T3453A | ORF1a  | NSP5   | T190A  | SNP        | 3C-like proteinase                                      | NSP5.T190A  | 1  |
| 192 | Singleton | 10667 | T-C | None   | ORF1a  | NSP5   | V204V  | SNP silent | 3C-like proteinase                                      | NSP5.V204V  | 1  |
| 193 | Pi        | 10679 | T-C | Y3472H | ORF1a  | NSP5   | Y209H  | SNP        | 3C-like proteinase                                      | NSP5.Y209H  | 1  |
| 194 | Pi        | 10702 | C-T | None   | ORF1a  | NSP5   | D216D  | SNP silent | 3C-like proteinase                                      | NSP5.D216D  | 2  |
| 195 | Singleton | 10750 | T-C | None   | ORF1a  | NSP5   | A234A  | SNP silent | 3C-like proteinase                                      | NSP5.A234A  | 1  |
| 196 | Pi        | 10771 | T-C | None   | ORF1a  | NSP5   | Y239Y  | SNP silent | 3C-like proteinase                                      | NSP5.Y239Y  | 2  |
| 197 | Pi        | 10781 | C-T | S3517P | ORF1a  | NSP5   | S254F  | SNP        | 3C-like proteinase                                      | NSP5.S254F  | 2  |
| 198 | Singleton | 10888 | A-G | None   | ORF1a  | NSP5   | G278G  | SNP silent | 3C-like proteinase                                      | NSP5.G278G  | 1  |
| 199 | Singleton | 11033 | C-T | P3613L | ORF1a  | NSP6   | P44L   | SNP        | Transmembrane protein                                   | NSP6.P44L   | 1  |
| 200 | Singleton | 11107 | T-C | None   | ORF1a  | NSP6   | F45F   | SNP silent | Transmembrane protein                                   | NSP6.F45F   | 1  |
| 201 | Singleton | 11191 | T-A | None   | ORF1a  | NSP6   | P73P   | SNP silent | Transmembrane protein                                   | NSP6.P73P   | 1  |
| 202 | Pi        | 11200 | C-T | None   | ORF1a  | NSP6   | A76A   | SNP silent | Transmembrane protein                                   | NSP6.A76A   | 4  |
| 203 | Singleton | 11264 | T-C | None   | ORF1a  | NSP6   | W97W   | SNP silent | Transmembrane protein                                   | NSP6.W97W   | 1  |
| 204 | Pi        | 11306 | G-A | D3681N | ORF1a  | NSP6   | D112N  | SNP        | Transmembrane protein                                   | NSP6.D112N  | 4  |
| 205 | Pi        | 11335 | C-T | None   | ORF1a  | NSP6   | Y121V  | SNP silent | Transmembrane protein                                   | NSP6.Y121V  | 2  |
| 206 | Singleton | 11456 | C-T | B731F  | ORF1a  | NSP6   | I162F  | SNP        | Transmembrane protein                                   | NSP6.I162F  | 1  |
| 207 | Pi        | 11457 | T-C | B731T  | ORF1a  | NSP6   | I162T  | SNP        | Transmembrane protein                                   | NSP6.I162T  | 2  |
| 208 | Singleton | 11530 | C-T | None   | ORF1a  | NSP6   | A186A  | SNP silent | Transmembrane protein                                   | NSP6.A186A  | 1  |
| 209 | Pi        | 11572 | C-T | None   | ORF1a  | NSP6   | F200F  | SNP silent | Transmembrane protein                                   | NSP6.F200F  | 2  |
| 210 | Pi        | 11620 | C-T | None   | ORF1a  | NSP6   | F216F  | SNP silent | Transmembrane protein                                   | NSP6.F216F  | 5  |
| 211 | Singleton | 11668 | C-T | None   | ORF1a  | NSP6   | N232N  | SNP silent | Transmembrane protein                                   | NSP6.N232N  | 1  |
| 212 | Singleton | 11742 | A-G | Q3826R | ORF1a  | NSP6   | Q257R  | SNP        | Transmembrane protein                                   | NSP6.Q257R  | 1  |
| 213 | Singleton | 11743 | G-T | Q3826H | ORF1a  | NSP6   | Q257H  | SNP        | Transmembrane protein                                   | NSP6.Q257H  | 1  |
| 214 | Singleton | 11747 | C-T | None   | ORF1a  | NSP6   | G258G  | SNP silent | Transmembrane protein                                   | NSP6.G258G  | 1  |
| 215 | Singleton | 11769 | T-C | B835T  | ORF1a  | NSP6   | I266T  | SNP        | Transmembrane protein                                   | NSP6.I266T  | 1  |
| 216 | Singleton | 12049 | C-T | None   | ORF1a  | NSP7   | N69N   | SNP silent | Non-Structural Protein 7                                | NSP7.N69N   | 1  |
| 217 | Pi        | 12076 | C-T | None   | ORF1a  | NSP7   | N78N   | SNP silent | Non-Structural Protein 7                                | NSP7.N78N   | 4  |
| 218 | Singleton | 12149 | G-A | E3962K | ORF1a  | NSP8   | E20K   | SNP        | Non-Structural Protein 8                                | NSP8.E20K   | 1  |
| 219 | Singleton | 12242 | C-T | R3993C | ORF1a  | NSP8   | R51C   | SNP        | Non-Structural Protein 8                                | NSP8.R51C   | 1  |
| 220 | Singleton | 12358 | A-C | None   | ORF1a  | NSP8   | ML90SF | SNP silent | Non-Structural Protein 8                                | NSP8.ML90SF | 1  |
| 221 | Singleton | 12361 | G-T | M4032S | ORF1a  | NSP8   | SNP    | SNP        | Non-Structural Protein 9                                | NSP8        | 1  |
| 222 | Singleton | 12362 | C-T | L4033F | ORF1a  | NSP8   | SNP    | SNP        | Non-Structural Protein 10                               | NSP8        | 1  |
| 223 | Singleton | 12400 | C-T | None   | ORF1a  | NSP8   | L103L  | SNP silent | Non-Structural Protein 8                                | NSP8.L103L  | 1  |
| 224 | Pi        | 12439 | C-T | None   | ORF1a  | NSP8   | P116P  | SNP silent | Non-Structural Protein 8                                | NSP8.P116P  | 8  |
| 225 | Singleton | 12471 | A-C | K4069T | ORF1a  | NSP8   | K127T  | SNP        | Non-Structural Protein 8                                | NSP8.K127T  | 1  |
| 226 | Singleton | 12507 | A-G | K4081R | ORF1a  | NSP8   | K139R  | SNP        | Non-Structural Protein 8                                | NSP8.K139R  | 1  |
| 227 | Singleton | 12541 | A-G | None   | ORF1a  | NSP8   | A150A  | SNP silent | Non-Structural Protein 8                                | NSP8.A150A  | 1  |
| 228 | Pi        | 12616 | C-T | None   | ORF1a  | NSP8   | D175D  | SNP silent | Non-Structural Protein 8                                | NSP8.D175D  | 9  |
| 229 | Singleton | 12710 | C-T | None   | ORF1a  | NSP9   | A8A    | SNP silent | ssRNA-binding protein                                   | NSP9.A8A    | 1  |
| 230 | Pi        | 12759 | C-T | None   | ORF1a  | NSP9   | T24T   | SNP silent | ssRNA-binding protein                                   | NSP9.T24T   | 6  |
| 231 | Singleton | 12806 | G-A | V4181I | ORF1a  | NSP9   | V41I   | SNP        | ssRNA-binding protein                                   | NSP9.V41I   | 1  |
| 232 | Singleton | 12970 | C-T | None   | ORF1a  | NSP9   | N95N   | SNP silent | ssRNA-binding protein                                   | NSP9.N95N   | 1  |
| 233 | Singleton | 12989 | G-A | V4242I | ORF1a  | NSP9   | V102I  | SNP        | ssRNA-binding protein                                   | NSP9.V102I  | 1  |
| 234 | Singleton | 13011 | C-T | T4249I | ORF1a  | NSP9   | T109I  | SNP        | ssRNA-binding protein                                   | NSP9.T109I  | 1  |
| 235 | Singleton | 13077 | C-T | A4271V | ORF1a  | NSP10  | A18V   | SNP        | Growth-factor-like protein                              | NSP10.A18V  | 1  |
| 236 | Singleton | 13083 | C-T | A4273V | ORF1a  | NSP10  | A20V   | SNP        | Growth-factor-like protein                              | NSP10.A20V  | 1  |
| 237 | Singleton | 13090 | T-C | None   | ORF1a  | NSP10  | D22D   | SNP silent | Growth-factor-like protein                              | NSP10.D22D  | 1  |
| 238 | Singleton | 13115 | C-T | None   | ORF1a  | NSP10  | Y30Y   | SNP silent | Growth-factor-like protein                              | NSP10.Y30Y  | 1  |
| 239 | Pi        | 13458 | C-T | S4398L | ORF1a  | NSP12a | S6I    | SNP        | RNA-dependent RNA polymerase, post-ribosomal frameshift | NSP12a.S6I  | 1  |
| 240 | Singleton | 13536 | C-T | None   | ORF1ab | NSP12b | Y23Y   | SNP silent | RNA-dependent RNA polymerase, post-ribosomal frameshift | NSP12b.Y23Y | 1  |
| 241 | Singleton | 13548 |     |        |        |        |        |            |                                                         |             |    |



|     |           |       |     |        |        |        |       |            |                                                         |              |    |
|-----|-----------|-------|-----|--------|--------|--------|-------|------------|---------------------------------------------------------|--------------|----|
| 253 | Pi        | 14130 | A-G | None   | ORF1ab | NSP12b | G221G | SNP_silent | RNA-dependent RNA polymerase, post-ribosomal frameshift | NSP12b:G221G | 2  |
| 254 | Pi        | 14181 | G-A | None   | ORF1ab | NSP12b | L238L | SNP_silent | RNA-dependent RNA polymerase, post-ribosomal frameshift | NSP12b:L238L | 3  |
| 255 | Singleton | 14198 | C-G | A4645G | ORF1ab | NSP12b | A244G | SNP        | RNA-dependent RNA polymerase, post-ribosomal frameshift | NSP12b:A244G | 1  |
| 256 | Singleton | 14220 | C-T | None   | ORF1ab | NSP12b | D251D | SNP_silent | RNA-dependent RNA polymerase, post-ribosomal frameshift | NSP12b:D251D | 1  |
| 257 | Pi        | 14274 | G-T | E4670D | ORF1ab | NSP12b | E299D | SNP        | RNA-dependent RNA polymerase, post-ribosomal frameshift | NSP12b:E299D | 2  |
| 258 | Singleton | 14290 | G-T | D4676Y | ORF1ab | NSP12b | D275Y | SNP        | RNA-dependent RNA polymerase, post-ribosomal frameshift | NSP12b:D275Y | 1  |
| 259 | Singleton | 14318 | C-T | T4685I | ORF1ab | NSP12b | T284I | SNP        | RNA-dependent RNA polymerase, post-ribosomal frameshift | NSP12b:T284I | 1  |
| 260 | Singleton | 14392 | T-A | S4710T | ORF1ab | NSP12b | S309T | SNP        | RNA-dependent RNA polymerase, post-ribosomal frameshift | NSP12b:S309T | 1  |
| 261 | Pi        | 14425 | C-A | L4721I | ORF1ab | NSP12b | L320I | SNP        | RNA-dependent RNA polymerase, post-ribosomal frameshift | NSP12b:L320I | 6  |
| 262 | Singleton | 14657 | C-T | A4798V | ORF1ab | NSP12b | A397V | SNP        | RNA-dependent RNA polymerase, post-ribosomal frameshift | NSP12b:A397V | 1  |
| 263 | Singleton | 14666 | C-T | T4801I | ORF1ab | NSP12b | T400I | SNP        | RNA-dependent RNA polymerase, post-ribosomal frameshift | NSP12b:T400I | 1  |
| 264 | Pi        | 14673 | A-G | None   | ORF1ab | NSP12b | K402K | SNP_silent | RNA-dependent RNA polymerase, post-ribosomal frameshift | NSP12b:K402K | 8  |
| 265 | Singleton | 14679 | T-C | None   | ORF1ab | NSP12b | G404G | SNP_silent | RNA-dependent RNA polymerase, post-ribosomal frameshift | NSP12b:G404G | 1  |
| 266 | Singleton | 14757 | C-T | None   | ORF1ab | NSP12b | H430H | SNP        | RNA-dependent RNA polymerase, post-ribosomal frameshift | NSP12b:H430H | 1  |
| 267 | Pi        | 14805 | C-T | None   | ORF1ab | NSP12b | Y446Y | SNP_silent | RNA-dependent RNA polymerase, post-ribosomal frameshift | NSP12b:Y446Y | 4  |
| 268 | Singleton | 14964 | A-G | None   | ORF1ab | NSP12b | K499K | SNP_silent | RNA-dependent RNA polymerase, post-ribosomal frameshift | NSP12b:K499K | 1  |
| 269 | Singleton | 15048 | C-T | None   | ORF1ab | NSP12b | I527I | SNP_silent | RNA-dependent RNA polymerase, post-ribosomal frameshift | NSP12b:I527I | 1  |
| 270 | Singleton | 15132 | T-C | None   | ORF1ab | NSP12b | S555S | SNP_silent | RNA-dependent RNA polymerase, post-ribosomal frameshift | NSP12b:S555S | 1  |
| 271 | Singleton | 15491 | A-G | D5076G | ORF1ab | NSP12b | D675G | SNP        | RNA-dependent RNA polymerase, post-ribosomal frameshift | NSP12b:D675G | 1  |
| 272 | Singleton | 15654 | C-T | None   | ORF1ab | NSP12b | D729D | SNP_silent | RNA-dependent RNA polymerase, post-ribosomal frameshift | NSP12b:D729D | 1  |
| 273 | Singleton | 15669 | C-T | None   | ORF1ab | NSP12b | N734N | SNP_silent | RNA-dependent RNA polymerase, post-ribosomal frameshift | NSP12b:N734N | 1  |
| 274 | Pi        | 15708 | G-T | M5148I | ORF1ab | NSP12b | M747I | SNP        | RNA-dependent RNA polymerase, post-ribosomal frameshift | NSP12b:M747I | 2  |
| 275 | Singleton | 15720 | C-T | None   | ORF1ab | NSP12b | D751D | SNP_silent | RNA-dependent RNA polymerase, post-ribosomal frameshift | NSP12b:D751D | 1  |
| 276 | Singleton | 15738 | C-T | None   | ORF1ab | NSP12b | F757F | SNP_silent | RNA-dependent RNA polymerase, post-ribosomal frameshift | NSP12b:F757F | 1  |
| 277 | Singleton | 15863 | G-A | G520E  | ORF1ab | NSP12b | G799E | SNP        | RNA-dependent RNA polymerase, post-ribosomal frameshift | NSP12b:G799E | 1  |
| 278 | Pi        | 16017 | C-T | None   | ORF1ab | NSP12b | F850F | SNP_silent | RNA-dependent RNA polymerase, post-ribosomal frameshift | NSP12b:F850F | 3  |
| 279 | Singleton | 16061 | A-G | N874S  | ORF1ab | NSP12b | N865S | SNP        | RNA-dependent RNA polymerase, post-ribosomal frameshift | NSP12b:N865S | 1  |
| 280 | Pi        | 16078 | G-A | V527I  | ORF1ab | NSP12b | V871I | SNP        | RNA-dependent RNA polymerase, post-ribosomal frameshift | NSP12b:V871I | 15 |
| 281 | Singleton | 16178 | C-T | S530L  | ORF1ab | NSP12b | S904L | SNP        | RNA-dependent RNA polymerase, post-ribosomal frameshift | NSP12b:S904L | 1  |
| 282 | Singleton | 16178 | G-A | None   | ORF1ab | NSP12b | P918P | SNP_silent | RNA-dependent RNA polymerase, post-ribosomal frameshift | NSP12b:P918P | 1  |
| 283 | Pi        | 16355 | A-G | K5364R | ORF1ab | NSP13  | K40R  | SNP        | Helicase                                                | NSP13:K40R   | 2  |
| 284 | Singleton | 16377 | G-T | None   | ORF1ab | NSP13  | P47P  | SNP_silent | Helicase                                                | NSP13:P47P   | 1  |
| 285 | Pi        | 16393 | C-T | P5377S | ORF1ab | NSP13  | P53S  | SNP        | Helicase                                                | NSP13:P53S   | 2  |
| 286 | Singleton | 16575 | C-T | None   | ORF1ab | NSP13  | D113D | SNP_silent | Helicase                                                | NSP13:D113D  | 1  |
| 287 | Pi        | 16626 | C-T | None   | ORF1ab | NSP13  | L130L | SNP_silent | Helicase                                                | NSP13:L130L  | 8  |
| 288 | Singleton | 16732 | T-G | S5490A | ORF1ab | NSP13  | S166A | SNP        | Helicase                                                | NSP13:S166A  | 1  |
| 289 | Pi        | 16738 | G-C | E5492Q | ORF1ab | NSP13  | E168Q | SNP        | Helicase                                                | NSP13:E168Q  | 2  |
| 290 | Singleton | 17113 | A-G | I5617V | ORF1ab | NSP13  | I293V | SNP        | Helicase                                                | NSP13:I293V  | 1  |
| 291 | Singleton | 17122 | G-T | A5620S | ORF1ab | NSP13  | A296S | SNP        | Helicase                                                | NSP13:A296S  | 1  |
| 292 | Pi        | 17135 | C-T | P5624L | ORF1ab | NSP13  | P300L | SNP        | Helicase                                                | NSP13:P300L  | 2  |
| 293 | Singleton | 17270 | A-G | K5669R | ORF1ab | NSP13  | K345R | SNP        | Helicase                                                | NSP13:K345R  | 1  |
| 294 | Singleton | 17373 | C-T | None   | ORF1ab | NSP13  | A379A | SNP_silent | Helicase                                                | NSP13:A379A  | 1  |
| 295 | Singleton | 17415 | T-C | None   | ORF1ab | NSP13  | A393A | SNP_silent | Helicase                                                | NSP13:A393A  | 1  |
| 296 | Pi        | 17440 | C-T | P5726S | ORF1ab | NSP13  | P402S | SNP        | Helicase                                                | NSP13:P402S  | 6  |
| 297 | Singleton | 17573 | C-T | A5770V | ORF1ab | NSP13  | A446V | SNP        | Helicase                                                | NSP13:A446V  | 1  |
| 298 | Singleton | 17574 | P-A | None   | ORF1ab | NSP13  | A446A | SNP_silent | Helicase                                                | NSP13:A446A  | 1  |
| 299 | Singleton | 17589 | T-A | None   | ORF1ab | NSP13  | T451T | SNP_silent | Helicase                                                | NSP13:T451T  | 1  |
| 300 | Singleton | 17656 | A-G | M5798V | ORF1ab | NSP13  | M474V | SNP        | Helicase                                                | NSP13:M474V  | 1  |
| 301 | Pi        | 17722 | G-T | V5820L | ORF1ab | NSP13  | V496L | SNP        | Helicase                                                | NSP13:V496L  | 2  |
| 302 | Singleton | 17745 | C-A | N5827K | ORF1ab | NSP13  | N503K | SNP        | Helicase                                                | NSP13:N503K  | 1  |
| 303 | Singleton | 17754 | G-T | W5830C | ORF1ab | NSP13  | W506C | SNP        | Helicase                                                | NSP13:W506C  | 1  |
| 304 | Singleton | 17762 | C-G | A5833G | ORF1ab | NSP13  | A509G | SNP        | Helicase                                                | NSP13:A509G  | 1  |
| 305 | Singleton | 17763 | T-G | A5833G | ORF1ab | NSP13  | None  | SNP        | Helicase                                                | NSP13:A5833G | 1  |
| 306 | Singleton | 17766 | C-T | None   | ORF1ab | NSP13  | V510V | SNP_silent | Helicase                                                | NSP13:V510V  | 1  |
| 307 | Singleton | 17850 | C-T | None   | ORF1ab | NSP13  | G538G | SNP_silent | Helicase                                                | NSP13:G538G  | 1  |
| 308 | Pi        | 17858 | A-G | Y5865C | ORF1ab | NSP13  | Y541C | SNP        | Helicase                                                | NSP13:Y541C  | 2  |
| 309 | Singleton | 17944 | G-T | V5894L | ORF1ab | NSP13  | V570L | SNP        | Helicase                                                | NSP13:V570L  | 1  |
| 310 | Pi        | 17959 | A-G | I5899V | ORF1ab | NSP13  | I575V | SNP        | Helicase                                                | NSP13:I575V  | 2  |
| 311 | Singleton | 17964 | G-T | M5900I | ORF1ab | NSP13  | M576I | SNP        | Helicase                                                | NSP13:M576I  | 1  |
| 312 | Singleton | 18032 | C-T | T5923I | ORF1ab | NSP13  | T599I | SNP        | Helicase                                                | NSP13:T599I  | 1  |
| 313 | Singleton | 18040 | A-G | A5926S | ORF1ab | NSP14  | None  | SNP        | 3'-to-5' exonuclease                                    | NSP14:A5926S | 1  |
| 314 | Pi        | 18052 | G-T | T5930A | ORF1ab | NSP14  | T5A   | SNP        | 3'-to-5' exonuclease                                    | NSP14:T5A    | 3  |
| 315 | Singleton | 18060 | C-T | None   | ORF1ab | NSP14  | L7L   | SNP_silent | 3'-to-5' exonuclease                                    | NSP14:L7L    | 1  |
| 316 | Singleton | 18118 | C-A | L5921I | ORF1ab | NSP14  | L27I  | SNP        | 3'-to-5' exonuclease                                    | NSP14:L27I   | 1  |
| 317 | Singleton | 18176 | C-T | P5971L | ORF1ab | NSP14  | P46L  | SNP        | 3'-to-5' exonuclease                                    | NSP14:P46L   | 1  |
| 318 | Singleton | 18186 | G-T | M5974I | ORF1ab | NSP14  | M49I  | SNP        | 3'-to-5' exonuclease                                    | NSP14:M49I   | 1  |
| 319 | Singleton | 18312 | C-A | None   | ORF1ab | NSP14  | V91V  | SNP_silent | 3'-to-5' exonuclease                                    | NSP14:V91V   | 1  |
| 320 | Singleton | 18744 | C-T | None   | ORF1ab | NSP14  | Y235Y | SNP_silent | 3'-to-5' exonuclease                                    | NSP14:Y235Y  | 1  |
| 321 | Singleton | 18803 | G-T | S6180I | ORF1ab | NSP14  | S255I | SNP        | 3'-to-5' exonuclease                                    | NSP14:S255I  | 1  |
| 322 | Singleton | 18888 | C-T | None   | ORF1ab | NSP14  | H283H | SNP_silent | 3'-to-5' exonuclease                                    | NSP14:H283H  | 1  |
| 323 | Singleton | 19017 | C-T | None   | ORF1ab | NSP14  | F326F | SNP_silent | 3'-to-5' exonuclease                                    | NSP14:F326F  | 1  |
| 324 | Pi        | 19086 | G-T | K6274N | ORF1ab | NSP14  | K349N | SNP        | 3'-to-5' exonuclease                                    | NSP14:K349N  | 3  |
| 325 | Singleton | 19182 | A-G | None   | ORF1ab | NSP14  | V381V | SNP_silent | 3'-to-5' exonuclease                                    | NSP14:V381V  | 1  |
| 326 | Pi        | 19185 | C-T | None   | ORF1ab | NSP14  | C382C | SNP_silent | 3'-to-5' exonuclease                                    | NSP14:C382C  | 2  |
| 327 | Singleton | 19215 | T-C | None   | ORF1ab | NSP14  | Y392Y | SNP_silent | 3'-to-5' exonuclease                                    | NSP14:Y392Y  | 1  |
| 328 | Singleton | 19721 | A-C | K6486T | ORF1ab | NSP15  | K34T  | SNP        | endoRNase                                               | NSP15:K34T   | 1  |
| 329 | Singleton | 19735 | G-T | D6491Y | ORF1ab | NSP15  | D39Y  | SNP        | endoRNase                                               | NSP15:D39Y   | 1  |
| 330 | Pi        | 19816 | G-T | V6518L | ORF1ab | NSP15  | V66L  | SNP        | endoRNase                                               | NSP15:V66L   | 4  |
| 331 | Singleton | 19861 | G-A | A6533T | ORF1ab | NSP15  | A81T  | SNP        | endoRNase                                               | NSP15:A81T   | 1  |
| 332 | Pi        | 19872 | G-T | None   | ORF1ab | NSP15  | V84V  | SNP_silent | endoRNase                                               | NSP15:V84V   | 3  |
| 333 | Singleton | 19881 | C-T | None   | ORF1ab | NSP15  | D87D  | SNP_silent | endoRNase                                               | NSP15:D87D   | 1  |
| 334 | Pi        | 20006 | G-A | G6581D | ORF1ab | NSP15  | G129D | SNP        | endoRNase                                               | NSP15:G129D  | 2  |
| 335 | Pi        | 20063 | T-C | V148A  | ORF1ab | NSP15  | V148A | SNP        | endoRNase                                               | NSP15:V148A  | 4  |
| 336 | Singleton | 20677 | C-T | P6805S | ORF1ab | NSP16  | P7S   | SNP        | 2'-O-ribose methyltransferase                           | NSP16:P7S    | 1  |
| 337 | Singleton | 20679 | G-T | None   | ORF1ab | NSP16  | P7P   | SNP_silent | 2'-O-ribose methyltransferase                           | NSP16:P7P    | 1  |
| 338 | Pi        | 20773 | G-T | G6837C | ORF1ab | NSP16  | G39C  | SNP        | 2'-O-ribose methyltransferase                           | NSP16:G39C   | 2  |
| 339 | Singleton | 20991 | G-C | L6909F | ORF1ab | NSP16  | L111F | SNP        | 2'-O-ribose methyltransferase                           | NSP16:L111F  | 1  |
| 340 | Pi        | 21004 | G-T | A6914S | ORF1ab | NSP16  | A116S | SNP        | 2'-O-ribose methyltransferase                           | NSP16:A116S  | 2  |
| 341 | ORF1ab    | 21018 | A-G | None   | ORF1ab | NSP16  | T120T | SNP_silent | 2'-O-ribose methyltransferase                           | NSP16:T120T  | 4  |
| 342 | Pi        | 21137 | A-G | K6958R | ORF1ab | NSP16  | K160R | SNP        | 2'-O-ribose methyltransferase                           | NSP16:K160R  | 2  |
| 343 | Pi        | 21724 | G-T | L54F   | S      | S      | L54F  | SNP        | Splice                                                  | S:L54F       | 9  |
| 344 | Singleton | 22004 | A-T | N148Y  | S      | S      | N148Y | SNP        | Splice                                                  | S:N148Y      | 1  |
| 345 | Singleton | 22030 | G-T | E156D  | S      | S      | E156D | SNP        | Splice                                                  | S:E156D      | 1  |
| 346 | Pi        | 22289 | G-T | A243S  | S      | S      | A243S | SNP        | Splice                                                  | S:A243S      | 2  |
| 347 | Singleton | 22326 | C-T | S255F  | S      | S      | S255F | SNP        | Splice                                                  | S:S255F      | 1  |
| 348 | Singleton | 22335 | G-A | None   | S      | S      | W258* | SNP_stop   | Splice                                                  | S:W258*      | 1  |
| 349 | Pi        | 22343 | G-A | G261S  | S      | S      | G261S | SNP        | Splice                                                  | S:G261S      | 3  |
| 350 | Pi        | 22374 | A-G | Q271R  | S      | S      | Q271R | SNP        | Splice                                                  | S:Q271R      | 2  |
| 351 | Singleton | 22384 | T-C | None   | S      | S      | T274T | SNP_silent | Splice                                                  | S:T274T      | 1  |
| 352 | Pi        | 22444 | C-T | None   | S      | S      | D294D | SNP_silent | Splice                                                  | S:D294D      | 69 |
| 353 | Singleton | 22458 | C-T | T299I  | S      | S      | T299I | SNP        | Splice                                                  | S:T299I      | 1  |
| 354 | Pi        | 22468 | G-T | None   | S      | S      | T302T | SNP_silent | Splice                                                  | S:T302T      | 28 |
| 355 | Singleton | 22483 | T-C | None   | S      | S      | T307T | SNP_silent | Splice                                                  | S:T307T      | 1  |
| 356 | Pi        | 22530 | C-T | T323I  | S      | S      | T323I | SNP        | Splice                                                  | S:T323I      | 3  |
| 357 | Singleton | 22585 | C-A | None   | S      | S      | G431G | SNP_silent | Splice                                                  | S:G431G      | 1  |
| 358 | Singleton | 22589 | C-A | None   | S      | S      | C432* | SNP_stop   | Splice                                                  | S:C432*      | 1  |
| 359 | Singleton | 22861 | T-A | None   | S      | S      | V433V | SNP_silent | Splice                                                  | S:V433V      | 1  |
| 360 | Singleton | 22863 | T-A | I434K  | S      | S      | I434K | SNP        | Splice                                                  | S:I434K      | 1  |
| 361 | Singleton | 22973 | G-C | E471Q  | S      | S      | E471Q | SNP        | Splice                                                  | S:E471Q      | 1  |
| 362 | Singleton | 23042 | T-C | S494P  | S      | S      | S494P | SNP        | Splice                                                  | S:S494P      | 1  |
| 363 | Pi        | 23120 | G-T | A520S  | S      | S      | A520S | SNP        | Splice                                                  | S:A520S      | 6  |
| 364 | Pi        | 23277 | C-T | T572I  | S      | S      | T572I | SNP        | Splice                                                  | S:T572I      | 8  |
| 365 | Singleton | 23282 | G-C | D574Y  | S      | S      | D574H | SNP        | Splice                                                  | S:D574H      | 1  |
| 366 | Pi        | 23331 | C-T | E583D  | S      | S      | E583D | SNP        | Splice                                                  | S:E583D      | 10 |
| 367 | Singleton | 23367 | C-T | T602I  | S      | S      | T602I | SNP        | Splice                                                  | S:T602I      | 2  |

|     |           |       |     |            |       |       |        |            |                      |             |     |
|-----|-----------|-------|-----|------------|-------|-------|--------|------------|----------------------|-------------|-----|
| 380 | Singleton | 23875 | T-C | None       | S     | S     | A771A  | SNP_silent | Spike                | S:A771A     | 1   |
| 381 | Singleton | 23952 | T-G | F797C      | S     | S     | F797C  | SNP        | Spike                | S:F797C     | 1   |
| 382 | Singleton | 24042 | C-T | T827I      | S     | S     | T827I  | SNP        | Spike                | S:T827I     | 1   |
| 383 | Singleton | 24045 | T-C | L828P      | S     | S     | L828P  | SNP        | Spike                | S:L828P     | 1   |
| 384 | Singleton | 24130 | G-T | A831S      | S     | S     | A831S  | SNP        | Spike                | S:A831S     | 1   |
| 385 | Singleton | 24130 | C-T | None       | S     | S     | N856N  | SNP_silent | Spike                | S:N856N     | 1   |
| 386 | Singleton | 24131 | G-T | G857C      | S     | S     | G857C  | SNP        | Spike                | S:G857C     | 1   |
| 387 | Singleton | 24133 | C-T | None       | S     | S     | G857G  | SNP_silent | Spike                | S:G857G     | 1   |
| 388 | Singleton | 24197 | G-T | A879S      | S     | S     | A879S  | SNP        | Spike                | S:A879S     | 1   |
| 389 | Singleton | 24237 | C-T | A892V      | S     | S     | A892V  | SNP        | Spike                | S:A892V     | 1   |
| 390 | Singleton | 24350 | G-A | A930T      | S     | S     | A930T  | SNP        | Spike                | S:A930T     | 1   |
| 391 | Singleton | 24351 | C-T | A930V      | S     | S     | A930V  | SNP        | Spike                | S:A930V     | 1   |
| 392 | Singleton | 24367 | A-G | None       | S     | S     | Q925Q  | SNP_silent | Spike                | S:Q925Q     | 1   |
| 393 | Singleton | 24384 | C-A | T941K      | S     | S     | T941K  | SNP        | Spike                | S:T941K     | 1   |
| 394 | Singleton | 24502 | C-T | None       | S     | S     | I980I  | SNP_silent | Spike                | S:I980I     | 1   |
| 395 | Singleton | 24624 | C-T | S1021F     | S     | S     | S1021F | SNP        | Spike                | S:S1021F    | 1   |
| 396 | Singleton | 24642 | C-T | T1027I     | S     | S     | T1027I | SNP        | Spike                | S:T1027I    | 1   |
| 397 | Singleton | 24694 | A-T | None       | S     | S     | G1044G | SNP_silent | Spike                | S:G1044G    | 1   |
| 398 | Singleton | 24757 | G-T | None       | S     | S     | V1065V | SNP_silent | Spike                | S:V1065V    | 1   |
| 399 | Singleton | 24764 | G-T | V1068F     | S     | S     | V1068F | SNP        | Spike                | S:V1068F    | 1   |
| 400 | Pi        | 24811 | T-A | H1083Q     | S     | S     | H1083Q | SNP        | Spike                | S:H1083Q    | 2   |
| 401 | Singleton | 24863 | C-T | H1101Y     | S     | S     | H1101Y | SNP        | Spike                | S:H1101Y    | 1   |
| 402 | Singleton | 24872 | G-T | V1104L     | S     | S     | V1104L | SNP        | Spike                | S:V1104L    | 1   |
| 403 | Singleton | 24904 | C-T | None       | S     | S     | I1114I | SNP_silent | Spike                | S:I1114I    | 1   |
| 404 | Pi        | 24933 | G-T | G1124V     | S     | S     | G1124V | SNP        | Spike                | S:G1124V    | 2   |
| 405 | Singleton | 25019 | G-T | D1153Y     | S     | S     | D1153Y | SNP        | Spike                | S:D1153Y    | 1   |
| 406 | Pi        | 25098 | T-A | I1179N     | S     | S     | I1179N | SNP        | Spike                | S:I1179N    | 2   |
| 407 | Singleton | 25104 | A-G | K1181R     | S     | S     | K1181R | SNP        | Spike                | S:K1181R    | 1   |
| 408 | Singleton | 25135 | G-T | K1191N     | S     | S     | K1191N | SNP        | Spike                | S:K1191N    | 1   |
| 409 | Singleton | 25162 | C-A | None       | S     | S     | Q1201K | SNP_silent | Spike                | S:Q1201K    | 1   |
| 410 | Singleton | 25163 | C-A | Q1201K     | S     | S     | Q1201K | SNP        | Spike                | S:Q1201K    | 1   |
| 411 | Singleton | 25252 | G-T | None       | S     | S     | V1230V | SNP_silent | Spike                | S:V1230V    | 1   |
| 412 | Pi        | 25290 | G-T | C1243F     | S     | S     | C1243F | SNP        | Spike                | S:C1243F    | 3   |
| 413 | Singleton | 25311 | G-T | C1250F     | S     | S     | C1250F | SNP        | Spike                | S:C1250F    | 1   |
| 414 | Pi        | 25314 | G-T | G1251V     | S     | S     | G1251V | SNP        | Spike                | S:G1251V    | 6   |
| 415 | Singleton | 25318 | C-T | None       | S     | S     | S1252S | SNP_silent | Spike                | S:S1252S    | 1   |
| 416 | Singleton | 25350 | C-T | P1263L     | S     | S     | P1263L | SNP        | Spike                | S:P1263L    | 1   |
| 417 | Singleton | 25413 | C-T | None       | ORF3a | ORF3a | I71I   | SNP_silent | ORF3a protein        | ORF3a:I71I  | 1   |
| 418 | Singleton | 25420 | G-T | V131L      | ORF3a | ORF3a | V131L  | SNP        | ORF3a protein        | ORF3a:V131L | 1   |
| 419 | Pi        | 25445 | G-T | G18V       | ORF3a | ORF3a | G18V   | SNP        | ORF3a protein        | ORF3a:G18V  | 2   |
| 420 | Pi        | 25461 | T-C | None       | ORF3a | ORF3a | A23A   | SNP_silent | ORF3a protein        | ORF3a:A23A  | 5   |
| 421 | Singleton | 25494 | G-T | None       | ORF3a | ORF3a | T34T   | SNP_silent | ORF3a protein        | ORF3a:T34T  | 1   |
| 422 | Singleton | 25496 | T-C | I35T       | ORF3a | ORF3a | I35T   | SNP        | ORF3a protein        | ORF3a:I35T  | 1   |
| 423 | Singleton | 25500 | G-A | None       | ORF3a | ORF3a | P36P   | SNP_silent | ORF3a protein        | ORF3a:P36P  | 1   |
| 424 | Pi        | 25513 | C-T | L41F       | ORF3a | ORF3a | L41F   | SNP        | ORF3a protein        | ORF3a:L41F  | 4   |
| 425 | Pi        | 25528 | C-T | L46F       | ORF3a | ORF3a | L46F   | SNP        | ORF3a protein        | ORF3a:L46F  | 6   |
| 426 | Singleton | 25549 | C-T | L53F       | ORF3a | ORF3a | L53F   | SNP        | ORF3a protein        | ORF3a:L53F  | 1   |
| 427 | Pi        | 25563 | G-T | Q57H       | ORF3a | ORF3a | Q57H   | SNP        | ORF3a protein        | ORF3a:Q57H  | 127 |
| 428 | Singleton | 25577 | T-C | I62T       | ORF3a | ORF3a | I62T   | SNP        | ORF3a protein        | ORF3a:I62T  | 1   |
| 429 | Pi        | 25596 | A-G | None       | ORF3a | ORF3a | R68R   | SNP_silent | ORF3a protein        | ORF3a:R68R  | 3   |
| 430 | Singleton | 25612 | T-G | S74A       | ORF3a | ORF3a | S74A   | SNP        | ORF3a protein        | ORF3a:S74A  | 1   |
| 431 | Pi        | 25613 | C-T | S74F       | ORF3a | ORF3a | S74F   | SNP        | ORF3a protein        | ORF3a:S74F  | 3   |
| 432 | Singleton | 25621 | G-T | V77F       | ORF3a | ORF3a | V77F   | SNP        | ORF3a protein        | ORF3a:V77F  | 1   |
| 433 | Singleton | 25634 | G-T | C81F       | ORF3a | ORF3a | C81F   | SNP        | ORF3a protein        | ORF3a:C81F  | 1   |
| 434 | Singleton | 25641 | G-T | L83F       | ORF3a | ORF3a | L83F   | SNP        | ORF3a protein        | ORF3a:L83F  | 1   |
| 435 | Singleton | 25642 | C-T | None       | ORF3a | ORF3a | L83L   | SNP_silent | ORF3a protein        | ORF3a:L83L  | 1   |
| 436 | Singleton | 25647 | G-T | L85F       | ORF3a | ORF3a | L85F   | SNP        | ORF3a protein        | ORF3a:L85F  | 1   |
| 437 | Singleton | 25649 | T-G | L86W       | ORF3a | ORF3a | L86W   | SNP        | ORF3a protein        | ORF3a:L86W  | 1   |
| 438 | Pi        | 25904 | C-T | S171L      | ORF3a | ORF3a | S171L  | SNP        | ORF3a protein        | ORF3a:S171L | 3   |
| 439 | Singleton | 25906 | G-T | G172C      | ORF3a | ORF3a | G172C  | SNP        | ORF3a protein        | ORF3a:G172C | 1   |
| 440 | Singleton | 25916 | C-T | T175I      | ORF3a | ORF3a | T175I  | SNP        | ORF3a protein        | ORF3a:T175I | 1   |
| 441 | Singleton | 25919 | C-T | T176I      | ORF3a | ORF3a | T176I  | SNP        | ORF3a protein        | ORF3a:T176I | 1   |
| 442 | Singleton | 25961 | C-T | T190I      | ORF3a | ORF3a | T190I  | SNP        | ORF3a protein        | ORF3a:T190I | 1   |
| 443 | Singleton | 25979 | G-T | G196V      | ORF3a | ORF3a | G196V  | SNP        | ORF3a protein        | ORF3a:G196V | 1   |
| 444 | Singleton | 25980 | A-C | None       | ORF3a | ORF3a | G196G  | SNP_silent | ORF3a protein        | ORF3a:G196G | 1   |
| 445 | Singleton | 25983 | A-G | None       | ORF3a | ORF3a | V197V  | SNP_silent | ORF3a protein        | ORF3a:V197V | 1   |
| 446 | Singleton | 26116 | G-T | Stop Codon | ORF3a | ORF3a | E242*  | SNP_stop   | ORF3a protein        | ORF3a:E242* | 1   |
| 447 | Pi        | 26144 | G-T | G251V      | ORF3a | ORF3a | G251V  | SNP        | ORF3a protein        | ORF3a:G251V | 1   |
| 448 | Pi        | 26226 | A-G | None       | NC    | 3'UTR | 26226  | extragenic | NA                   | 3'UTR:26226 | 2   |
| 449 | Singleton | 26319 | A-G | None       | E     | E     | V25V   | SNP_silent | Envelope             | E:V25V      | 1   |
| 450 | Singleton | 26329 | G-A | V29S       | E     | E     | V29S   | SNP        | Envelope             | E:V29S      | 1   |
| 451 | Pi        | 26330 | T-G | None       | E     | E     | V29G   | SNP        | Envelope             | E:V29G      | 2   |
| 452 | Pi        | 26375 | G-A | Stop Codon | E     | E     | C44*   | SNP_stop   | Envelope             | E:C44*      | 2   |
| 453 | Pi        | 26376 | C-A | None       | E     | E     | None   | SNP_stop   | Envelope             | E:None      | 2   |
| 454 | Pi        | 26530 | A-G | D3G        | M     | M     | D3G    | SNP        | Membrane             | M:D3G       | 3   |
| 455 | Pi        | 26681 | C-T | None       | M     | M     | F53F   | SNP_silent | Membrane             | M:F53F      | 2   |
| 456 | Singleton | 26690 | G-T | None       | M     | M     | L56L   | SNP_silent | Membrane             | M:L56L      | 1   |
| 457 | Singleton | 26724 | G-T | A68S       | M     | M     | A68S   | SNP        | Membrane             | M:A68S      | 1   |
| 458 | Singleton | 26727 | G-T | A69S       | M     | M     | A69S   | SNP        | Membrane             | M:A69S      | 1   |
| 459 | Pi        | 26730 | G-T | V70F       | M     | M     | V70F   | SNP        | Membrane             | M:V70F      | 4   |
| 460 | Pi        | 26735 | C-T | None       | M     | M     | Y71Y   | SNP_silent | Membrane             | M:Y71Y      | 117 |
| 461 | Singleton | 26801 | C-T | None       | M     | M     | L93L   | SNP_silent | Membrane             | M:L93L      | 1   |
| 462 | Singleton | 26895 | C-T | H125Y      | M     | M     | H125Y  | SNP        | Membrane             | M:H125Y     | 1   |
| 463 | Pi        | 27110 | C-T | None       | M     | M     | Y196Y  | SNP_silent | Membrane             | M:Y196Y     | 5   |
| 464 | Singleton | 27207 | T-C | None       | ORF6  | ORF6  | F2F    | SNP_silent | ORF6 protein         | ORF6:F2F    | 1   |
| 465 | Pi        | 27213 | C-T | None       | ORF6  | ORF6  | L4L    | SNP_silent | ORF6 protein         | ORF6:L4L    | 4   |
| 466 | Singleton | 27273 | T-C | None       | ORF6  | ORF6  | V24V   | SNP_silent | ORF6 protein         | ORF6:V24V   | 1   |
| 467 | Pi        | 27379 | A-G | I60V       | ORF6  | ORF6  | I60V   | SNP        | ORF6 protein         | ORF6:I60V   | 2   |
| 468 | Pi        | 27383 | A-T | D61L       | ORF6  | ORF6  | D61L   | SNP        | ORF6 protein         | ORF6:D61L   | 2   |
| 469 | Pi        | 27384 | T-C | None       | ORF6  | ORF6  | D61D   | SNP_silent | ORF6 protein         | ORF6:D61D   | 7   |
| 470 | Singleton | 27389 | C-T | None       | NC    | 3'UTR | 27389  | extragenic | NA                   | 3'UTR:27389 | 1   |
| 471 | Singleton | 27506 | G-T | G38V       | ORF7a | ORF7a | G38V   | SNP        | ORF7a protein        | ORF7a:G38V  | 1   |
| 472 | Singleton | 27527 | C-T | P45L       | ORF7a | ORF7a | P45L   | SNP        | ORF7a protein        | ORF7a:P45L  | 1   |
| 473 | Singleton | 27849 | C-T | L32F       | ORF7b | ORF7b | L32F   | SNP        | ORF7b protein        | ORF7b:L32F  | 1   |
| 474 | Pi        | 28289 | C-A | P6T        | N     | N     | P6T    | SNP        | Nucleocapsid protein | N:P6T       | 2   |
| 475 | Pi        | 28312 | C-T | P13L       | N     | N     | P13L   | SNP        | Nucleocapsid protein | N:P13L      | 2   |
| 476 | Pi        | 28326 | G-T | G18V       | N     | N     | G18V   | SNP        | Nucleocapsid protein | N:G18V      | 11  |
| 477 | Singleton | 28362 | G-T | G30V       | N     | N     | G30V   | SNP        | Nucleocapsid protein | N:G30V      | 1   |
| 478 | Pi        | 28371 | G-T | S33I       | N     | N     | S33I   | SNP        | Nucleocapsid protein | N:S33I      | 2   |
| 479 | Singleton | 28383 | C-T | S37L       | N     | N     | S37L   | SNP        | Nucleocapsid protein | N:S37L      | 1   |
| 480 | Singleton | 28390 | A-G | None       | N     | N     | Q39Q   | SNP_silent | Nucleocapsid protein | N:Q39Q      | 1   |
| 481 | Pi        | 28396 | G-A | None       | N     | N     | R41R   | SNP_silent | Nucleocapsid protein | N:R41R      | 2   |
| 482 | Singleton | 28432 | C-T | None       | N     | N     | F53F   | SNP_silent | Nucleocapsid protein | N:F53F      | 1   |
| 483 | Singleton | 28460 | G-A | D63N       | N     | N     | D63N   | SNP        | Nucleocapsid protein | N:D63N      | 1   |
| 484 | Singleton | 28549 | A-C | R92S       | N     | N     | R92S   | SNP        | Nucleocapsid protein | N:R92S      | 1   |
| 485 | Singleton | 28550 | C-A | None       | N     | N     | None   | SNP_silent | Nucleocapsid protein | N:None      | 1   |
| 486 | Singleton | 28690 | G-T | L139F      | N     | N     | L139F  | SNP        | Nucleocapsid protein | N:L139F     | 1   |
| 487 | Singleton | 28703 | G-T | D144Y      | N     | N     | D144Y  | SNP        | Nucleocapsid protein | N:D144Y     | 1   |
| 488 | Singleton | 28720 | C-T | None       | N     | N     | R149R  | SNP_silent | Nucleocapsid protein | N:R149R     | 1   |
| 489 | Singleton | 28727 | G-T | A152S      | N     | N     | A152S  | SNP        | Nucleocapsid protein | N:A152S     | 1   |
| 490 | Singleton | 28739 | G-T | A156S      | N     | N     | A156S  | SNP        | Nucleocapsid protein | N:A156S     | 1   |
| 491 | Singleton | 28752 | A-C | Q160P      | N     | N     | Q160P  | SNP        | Nucleocapsid protein | N:Q160P     | 1   |
| 492 | Singleton | 29029 | T-C | None       | N     | N     | A252A  | SNP_silent | Nucleocapsid protein | N:A252A     | 1   |
| 493 | Pi        | 29039 | A-T | Stop Codon | N     | N     | K256*  | SNP_stop   | Nucleocapsid protein | N:K256*     | 5   |

| Supplementary file 4: Age, Gender and Location data for corresponding 611 SARS-Cov-2 genomes |             |                     |               |                           |                           |                       |               |                    |                       |                        |                           |
|----------------------------------------------------------------------------------------------|-------------|---------------------|---------------|---------------------------|---------------------------|-----------------------|---------------|--------------------|-----------------------|------------------------|---------------------------|
| S No                                                                                         | Genome ID   | GISAID Accession ID | State         | Genome                    |                           | NCBI BLAST Per. ident | GISAID Gender | GISAID Patient age | GISAID Patient status | GISAID Collection date | Sum of Mutation Incidence |
|                                                                                              |             |                     |               | Detective NT Identity (%) | Detective AA Identity (%) |                       |               |                    |                       |                        |                           |
| 1                                                                                            | NC 045512.2 | NC 045512.2         | Wuhan, China  | 100                       | 100                       | 0                     |               |                    |                       | 2020-12-00             | 0                         |
| 2                                                                                            | 413522      | EPI_ISL_413522      | Kerala        | 99.9833                   | 99.9581                   | 99.97                 | Female        | 20                 | Recovered             | 2020-01-27             | 4                         |
| 3                                                                                            | 413523      | EPI_ISL_413523      | Kerala        | 99.9799                   | 99.9512                   | 99.98                 | Male          | 23                 | Recovered             | 2020-01-31             | 3                         |
| 4                                                                                            | 420543      | EPI_ISL_420543      | Maharashtra   | 99.9799                   | 99.9721                   | 99.98                 |               |                    |                       | 2020-03-03             | 2                         |
| 5                                                                                            | 420544      | EPI_ISL_420544      | Maharashtra   | 99.9833                   | 99.9721                   | 99.98                 |               |                    |                       | 2020                   | 1                         |
| 6                                                                                            | 420545      | EPI_ISL_420545      | Maharashtra   | 99.9799                   | 99.9721                   | 99.98                 |               |                    |                       | 2020-03-03             | 2                         |
| 7                                                                                            | 420546      | EPI_ISL_420546      | Maharashtra   | 99.9833                   | 99.9721                   | 99.98                 |               |                    |                       | 2020                   | 1                         |
| 8                                                                                            | 420547      | EPI_ISL_420547      | Maharashtra   | 99.9833                   | 99.9721                   | 99.98                 |               |                    |                       | 2020-03-03             | 1                         |
| 9                                                                                            | 420548      | EPI_ISL_420548      | Maharashtra   | 99.9833                   | 99.9721                   | 99.98                 |               |                    |                       | 2020                   | 1                         |
| 10                                                                                           | 420549      | EPI_ISL_420549      | Maharashtra   | 99.9833                   | 99.9721                   | 99.98                 |               |                    |                       | 2020-03-03             | 1                         |
| 11                                                                                           | 420550      | EPI_ISL_420550      | Maharashtra   | 99.9833                   | 99.9721                   | 99.98                 |               |                    |                       | 2020                   | 1                         |
| 12                                                                                           | 420551      | EPI_ISL_420551      | Maharashtra   | 99.9833                   | 99.9721                   | 99.98                 |               |                    |                       | 2020-03-03             | 1                         |
| 13                                                                                           | 420552      | EPI_ISL_420552      | Maharashtra   | 99.9833                   | 99.9721                   | 99.98                 |               |                    |                       | 2020                   | 1                         |
| 14                                                                                           | 420553      | EPI_ISL_420553      | Maharashtra   | 99.9799                   | 99.9721                   | 99.98                 |               |                    |                       | 2020-03-03             | 1                         |
| 15                                                                                           | 420554      | EPI_ISL_420554      | Maharashtra   | 99.9799                   | 99.9721                   | 99.98                 |               |                    |                       | 2020                   | 1                         |
| 16                                                                                           | 420555      | EPI_ISL_420555      | Maharashtra   | 99.9732                   | 99.9651                   | 99.97                 |               |                    |                       | 2020-03-03             | 0                         |
| 17                                                                                           | 420556      | EPI_ISL_420556      | Maharashtra   | 99.9732                   | 99.9651                   | 99.97                 |               |                    |                       | 2020                   | 0                         |
| 18                                                                                           | 421662      | EPI_ISL_421662      | Maharashtra   | 99.9632                   | 99.8953                   | 99.96                 |               |                    |                       | 2020-03-10             | 3                         |
| 19                                                                                           | 421663      | EPI_ISL_421663      | Maharashtra   | 99.9631                   | 99.9093                   | 99.96                 |               |                    |                       | 2020-03-10             | 5                         |
| 20                                                                                           | 421664      | EPI_ISL_421664      | Maharashtra   | 99.9699                   | 99.9302                   | 99.97                 |               |                    |                       | 2020-03-10             | 3                         |
| 21                                                                                           | 421665      | EPI_ISL_421665      | Maharashtra   | 99.9532                   | 99.9372                   | 99.96                 |               |                    |                       | 2020-03-10             | 5                         |
| 22                                                                                           | 421666      | EPI_ISL_421666      | Maharashtra   | 99.9799                   | 99.9721                   | 99.98                 |               |                    |                       | 2020-03-10             | 2                         |
| 23                                                                                           | 421667      | EPI_ISL_421667      | Maharashtra   | 99.9732                   | 99.9372                   | 99.97                 |               |                    |                       | 2020-03-10             | 2                         |
| 24                                                                                           | 421668      | EPI_ISL_421668      | Maharashtra   | 99.9632                   | 99.9442                   | 99.94                 |               |                    |                       | 2020-03-10             | 4                         |
| 25                                                                                           | 421669      | EPI_ISL_421669      | Maharashtra   | 99.9732                   | 99.9372                   | 99.97                 |               |                    |                       | 2020-03-12             | 3                         |
| 26                                                                                           | 421670      | EPI_ISL_421670      | Maharashtra   | 99.9565                   | 99.9163                   | 99.96                 |               |                    |                       | 2020-03-12             | 3                         |
| 27                                                                                           | 421671      | EPI_ISL_421671      | Maharashtra   | 99.9732                   | 99.9372                   | 99.97                 |               |                    |                       | 2020-03-12             | 3                         |
| 28                                                                                           | 421672      | EPI_ISL_421672      | Maharashtra   | 99.9732                   | 99.9302                   | 99.97                 |               |                    |                       | 2020-03-12             | 3                         |
| 29                                                                                           | 424361      | EPI_ISL_424361      | Maharashtra   | 99.9699                   | 99.9372                   | 99.97                 |               |                    |                       | 2020-03-10             | 1                         |
| 30                                                                                           | 424362      | EPI_ISL_424362      | Maharashtra   | 99.9699                   | 99.9581                   | 99.97                 |               |                    |                       | 2020-03-10             | 5                         |
| 31                                                                                           | 424363      | EPI_ISL_424363      | Maharashtra   | 99.9631                   | 99.9023                   | 99.96                 |               |                    |                       | 2020-03-12             | 4                         |
| 32                                                                                           | 424364      | EPI_ISL_424364      | Maharashtra   | 99.9766                   | 99.9791                   | 99.98                 |               |                    |                       | 2020-03-17             | 1                         |
| 33                                                                                           | 424365      | EPI_ISL_424365      | Maharashtra   | 99.9766                   | 99.9791                   | 99.98                 |               |                    |                       | 2020-03-17             | 1                         |
| 34                                                                                           | 426179      | EPI_ISL_426179      | Maharashtra   | 99.9732                   | 99.9651                   | 99.97                 |               |                    |                       | 2020-03-02             | 0                         |
| 35                                                                                           | 426414      | EPI_ISL_426414      | Gujarat       | 99.9732                   | 99.9651                   | 99.97                 | Male          | 37                 | Released              | 2020-04-05             | 3                         |
| 36                                                                                           | 426415      | EPI_ISL_426415      | Gujarat       | 99.9699                   | 99.9512                   | 99.97                 | Male          | 37                 | Released              | 2020-04-05             | 4                         |
| 37                                                                                           | 428479      | EPI_ISL_428479      | Karnataka     | 99.9591                   | 99.9224                   | 99.95                 | Male          | 68                 | NA                    | 2020-04-06             | 0                         |
| 38                                                                                           | 428480      | EPI_ISL_428480      | Karnataka     | 99.9039                   | 99.7012                   | 99.91                 | Female        | 28                 | NA                    | 2020-04-06             | 3                         |
| 39                                                                                           | 428481      | EPI_ISL_428481      | Karnataka     | 99.9561                   | 99.9088                   | 99.96                 | Male          | 55                 | NA                    | 2020-04-06             | 1                         |
| 40                                                                                           | 428482      | EPI_ISL_428482      | Karnataka     | 99.9528                   | 99.9159                   | 99.96                 | Male          | 26                 | NA                    | 2020-04-08             | 1                         |
| 41                                                                                           | 428483      | EPI_ISL_428483      | Karnataka     | 99.9659                   | 99.8941                   | 99.97                 | Male          | 19                 | NA                    | 2020-04-10             | 1                         |
| 42                                                                                           | 428484      | EPI_ISL_428484      | Karnataka     | 99.9727                   | 99.9223                   | 99.97                 | Male          | 55                 | NA                    | 2020-04-10             | 0                         |
| 43                                                                                           | 428485      | EPI_ISL_428485      | Karnataka     | 99.9273                   | 99.7032                   | 99.91                 | Male          | 32                 | NA                    | 2020-04-12             | 2                         |
| 44                                                                                           | 428486      | EPI_ISL_428486      | Karnataka     | 99.9694                   | 99.9155                   | 99.97                 | Male          | 43                 | NA                    | 2020-04-14             | 1                         |
| 45                                                                                           | 428487      | EPI_ISL_428487      | Karnataka     | 99.9693                   | 99.9152                   | 99.97                 | Male          | 25                 | NA                    | 2020-04-14             | 1                         |
| 46                                                                                           | 430464      | EPI_ISL_430464      | West Bengal   | 99.9732                   | 99.9581                   | 99.97                 |               |                    |                       | 2020-03-21             | 1                         |
| 47                                                                                           | 430465      | EPI_ISL_430465      | West Bengal   | 99.9732                   | 99.9651                   | 99.97                 |               |                    |                       | 2020-03-28             | 1                         |
| 48                                                                                           | 430466      | EPI_ISL_430466      | West Bengal   | 99.9799                   | 99.9721                   | 99.98                 |               |                    |                       | 2020-03-26             | 2                         |
| 49                                                                                           | 430467      | EPI_ISL_430467      | West Bengal   | 99.9766                   | 99.9651                   | 99.98                 |               |                    |                       | 2020-04-03             | 0                         |
| 50                                                                                           | 430468      | EPI_ISL_430468      | West Bengal   | 99.9732                   | 99.9581                   | 99.97                 |               |                    |                       | 2020-03-21             | 1                         |
| 51                                                                                           | 431101      | EPI_ISL_431101      | Telangana     | 99.9766                   | 99.9721                   | 99.98                 | Male          | 24                 | Hospitaliz            | 2020-03-01             | 1                         |
| 52                                                                                           | 431102      | EPI_ISL_431102      | Telangana     | 99.9866                   | 99.986                    | 99.99                 | Female        | 24                 | Asymptom              | 2020-03-11             | 0                         |
| 53                                                                                           | 431103      | EPI_ISL_431103      | Telangana     | 99.9665                   | 99.9233                   | 99.97                 | Male          | 52                 | Released              | 2020-03-16             | 0                         |
| 54                                                                                           | 431117      | EPI_ISL_431117      | Telangana     | 99.9732                   | 99.9651                   | 99.97                 | Male          | 21                 | Released              | 2020-03-20             | 0                         |
| 55                                                                                           | 435049      | EPI_ISL_435049      | Gujarat       | 99.9866                   | 99.9791                   | 99.94                 | Male          | 45                 | Released,             | 2020-04-13             | 0                         |
| 56                                                                                           | 435050      | EPI_ISL_435050      | Gujarat       | 99.9799                   | 99.9721                   | 99.98                 | Female        | 42                 | Released,             | 2020-04-13             | 2                         |
| 57                                                                                           | 435051      | EPI_ISL_435051      | Gujarat       | 99.9698                   | 99.9372                   | 99.97                 | Male          | 66                 | Deceased              | 2020-04-13             | 2                         |
| 58                                                                                           | 435052      | EPI_ISL_435052      | Gujarat       | 99.9495                   | 99.8601                   | 99.89                 | Female        | 66                 | Released,             | 2020-04-13             | 3                         |
| 59                                                                                           | 435053      | EPI_ISL_435053      | Gujarat       | 99.9698                   | 99.9651                   | 99.97                 | Female        | 60                 | Released              | 2020-04-07             | 4                         |
| 60                                                                                           | 435054      | EPI_ISL_435054      | Gujarat       | 99.9732                   | 99.9581                   | 99.97                 |               |                    |                       | 2020-04-14             | 0                         |
| 61                                                                                           | 435055      | EPI_ISL_435055      | Gujarat       | 99.9631                   | 99.9581                   | 99.96                 | Male          | 33                 | Released              | 2020-04-22             | 5                         |
| 62                                                                                           | 435056      | EPI_ISL_435056      | Gujarat       | 99.9295                   | 99.8883                   | 99.84                 | Male          | 65                 | Released              | 2020-04-21             | 2                         |
| 63                                                                                           | 435060      | EPI_ISL_435060      | Uttar Pradesh | 99.9162                   | 99.8326                   | 99.92                 |               |                    |                       | 2020-03-12             | 1                         |
| 64                                                                                           | 435061      | EPI_ISL_435061      | Delhi         | 99.9531                   | 99.9372                   | 99.95                 |               |                    |                       | 2020-03-16             | 2                         |
| 65                                                                                           | 435062      | EPI_ISL_435062      | Punjab        | 99.9163                   | 99.8395                   | 99.92                 |               |                    |                       | 2020-03-16             | 1                         |
| 66                                                                                           | 435063      | EPI_ISL_435063      | Delhi         | 99.9464                   | 99.8814                   | 99.95                 |               |                    |                       | 2020-03-13             | 1                         |
| 67                                                                                           | 435064      | EPI_ISL_435064      | Delhi         | 99.9665                   | 99.9163                   | 99.97                 |               |                    |                       | 2020-03-18             | 1                         |
| 68                                                                                           | 435065      | EPI_ISL_435065      | Delhi         | 99.8962                   | 99.7837                   | 99.9                  |               |                    |                       | 2020-03-15             | 3                         |
| 69                                                                                           | 435066      | EPI_ISL_435066      | Delhi         | 99.933                    | 99.9163                   | 99.93                 |               |                    |                       | 2020-03-18             | 3                         |
| 70                                                                                           | 435067      | EPI_ISL_435067      | Delhi         | 99.9297                   | 99.8744                   | 99.93                 |               |                    |                       | 2020-03-18             | 4                         |
| 71                                                                                           | 435068      | EPI_ISL_435068      | Delhi         | 99.9531                   | 99.9302                   | 99.95                 |               |                    |                       | 2020-03-18             | 3                         |
| 72                                                                                           | 435069      | EPI_ISL_435069      | Delhi         | 99.9397                   | 99.8884                   | 99.94                 |               |                    |                       | 2020-03-18             | 3                         |
| 73                                                                                           | 435070      | EPI_ISL_435070      | Delhi         | 99.8493                   | 99.6651                   | 99.85                 |               |                    |                       | 2020-03-18             | 0                         |
| 74                                                                                           | 435071      | EPI_ISL_435071      | Delhi         | 99.9565                   | 99.9302                   | 99.96                 |               |                    |                       | 2020-03-25             | 0                         |
| 75                                                                                           | 435072      | EPI_ISL_435072      | Delhi         | 99.8955                   | 99.7749                   | 99.89                 |               |                    |                       | 2020-03-26             | 1                         |
| 76                                                                                           | 435074      | EPI_ISL_435074      | West Bengal   | 99.9698                   | 99.9302                   | 99.97                 |               |                    |                       | 2020-03-28             | 0                         |
| 77                                                                                           | 435078      | EPI_ISL_435078      | Tamil Nadu    | 99.8995                   | 99.7488                   | 99.9                  |               |                    |                       | 2020-03-29             | 0                         |
| 78                                                                                           | 435080      | EPI_ISL_435080      | Tamil Nadu    | 99.8717                   | 99.6772                   | 99.88                 |               |                    |                       | 2020-03-29             | 0                         |
| 79                                                                                           | 435081      | EPI_ISL_435081      | West Bengal   | 99.9464                   | 99.8395                   | 99.95                 |               |                    |                       | 2020-03-28             | 0                         |
| 80                                                                                           | 435082      | EPI_ISL_435082      | Uttar Pradesh | 99.8856                   | 99.776                    | 99.88                 |               |                    |                       | 2020-03-29             | 1                         |
| 81                                                                                           | 435083      | EPI_ISL_435083      | Tamil Nadu    | 99.9328                   | 99.8318                   | 99.92                 |               |                    |                       | 2020-03-28             | 0                         |
| 82                                                                                           | 435084      | EPI_ISL_435084      | Tamil Nadu    | 99.9094                   | 99.8393                   | 99.94                 |               |                    |                       | 2020-03-29             | 0                         |
| 83                                                                                           | 435085      | EPI_ISL_435085      | Maharashtra   | 99.9196                   | 99.7767                   | 99.92                 |               |                    |                       | 2020-03-29             | 0                         |
| 84                                                                                           | 435086      | EPI_ISL_435086      | Maharashtra   | 99.9163                   | 99.8256                   | 99.92                 |               |                    |                       | 2020-03-29             | 0                         |
| 85                                                                                           | 435087      | EPI_ISL_435087      | Tamil Nadu    | 99.902                    | 99.7672                   | 99.89                 |               |                    |                       | 2020-03-29             | 0                         |
| 86                                                                                           | 435088      | EPI_ISL_435088      | Odisha        | 99.9055                   | 99.7263                   | 99.91                 |               |                    |                       | 2020-03-29             | 0                         |
| 87                                                                                           | 435090      | EPI_ISL_435090      | Jammu         | 99.9397                   | 99.8395                   | 99.87                 |               |                    |                       | 2020-03-29             | 0                         |
| 88                                                                                           | 435091      | EPI_ISL_435091      | Tamil Nadu    | 99.9531                   | 99.8744                   | 99.95                 |               |                    |                       | 2020-03-28             | 0                         |
| 89                                                                                           | 435092      | EPI_ISL_435092      | Tamil Nadu    | 99.9297                   | 99.8395                   | 99.93                 |               |                    |                       | 2020-03-28             | 0                         |

| S No | Genome ID | GISAID Accession ID | State          | Genome                       |                           | NCBI BLAST Per. ident | GISAID Gender | GISAID Patient age | GISAID Patient status | GISAID Collection date | Sum of Mutation Incidence |
|------|-----------|---------------------|----------------|------------------------------|---------------------------|-----------------------|---------------|--------------------|-----------------------|------------------------|---------------------------|
|      |           |                     |                | Detective AA NT Identity (%) | Detective AA Identity (%) |                       |               |                    |                       |                        |                           |
| 90   | 435093    | EPI_ISL_435093      | Tamil Nadu     | 99.9431                      | 99.8674                   | 99.94                 |               |                    |                       | 2020-03-29             | 0                         |
| 91   | 435094    | EPI_ISL_435094      | Tamil Nadu     | 99.9632                      | 99.9163                   | 99.96                 |               |                    |                       | 2020-03-29             | 0                         |
| 92   | 435095    | EPI_ISL_435095      | Tamil Nadu     | 99.9598                      | 99.9093                   | 99.96                 |               |                    |                       | 2020-03-29             | 0                         |
| 93   | 435096    | EPI_ISL_435096      | Tamil Nadu     | 99.9699                      | 99.9302                   | 99.97                 |               |                    |                       | 2020-03-29             | 0                         |
| 94   | 435097    | EPI_ISL_435097      | West Bengal    | 99.9699                      | 99.9233                   | 99.97                 |               |                    |                       | 2020-03-28             | 0                         |
| 95   | 435098    | EPI_ISL_435098      | Delhi          | 99.9196                      | 99.8186                   | 99.92                 |               |                    |                       | 2020-03-28             | 0                         |
| 96   | 435099    | EPI_ISL_435099      | Uttar Pradesh  | 99.9565                      | 99.8814                   | 99.96                 |               |                    |                       | 2020-03-29             | 0                         |
| 97   | 435100    | EPI_ISL_435100      | Uttar Pradesh  | 99.9531                      | 99.9093                   | 99.95                 |               |                    |                       | 2020-03-29             | 0                         |
| 98   | 435101    | EPI_ISL_435101      | Ladakh         | 99.9565                      | 99.9023                   | 99.96                 |               |                    |                       | 2020-03-15             | 2                         |
| 99   | 435102    | EPI_ISL_435102      | Ladakh         | 99.9262                      | 99.8254                   | 99.93                 |               |                    |                       | 2020-03-15             | 2                         |
| 100  | 435103    | EPI_ISL_435103      | Ladakh         | 99.9464                      | 99.8605                   | 99.95                 |               |                    |                       | 2020-03-17             | 2                         |
| 101  | 435104    | EPI_ISL_435104      | Ladakh         | 99.9196                      | 99.8116                   | 99.92                 |               |                    |                       | 2020-03-17             | 3                         |
| 102  | 435105    | EPI_ISL_435105      | Ladakh         | 99.9531                      | 99.9023                   | 99.95                 |               |                    |                       | 2020-03-17             | 3                         |
| 103  | 435106    | EPI_ISL_435106      | Ladakh         | 99.8616                      | 99.6634                   | 99.86                 |               |                    |                       | 2020-03-18             | 2                         |
| 104  | 435108    | EPI_ISL_435108      | Delhi          | 99.9263                      | 99.8326                   | 99.93                 |               |                    |                       | 2020-03-15             | 5                         |
| 105  | 435109    | EPI_ISL_435109      | Delhi          | 99.8989                      | 99.7628                   | 99.9                  |               |                    |                       | 2020-03-17             | 5                         |
| 106  | 435110    | EPI_ISL_435110      | Delhi          | 99.8851                      | 99.7544                   | 99.88                 |               |                    |                       | 2020-03-16             | 3                         |
| 107  | 435111    | EPI_ISL_435111      | Delhi          | 99.9464                      | 99.8953                   | 99.95                 |               |                    |                       | 2020-03-30             | 4                         |
| 108  | 435112    | EPI_ISL_435112      | Bihar          | 99.9297                      | 99.8674                   | 99.93                 |               |                    |                       | 2020-03-28             | 0                         |
| 109  | 436413    | EPI_ISL_436413      | Uttar Pradesh  | 99.9358                      | 99.8597                   | 99.95                 |               |                    |                       | 2020-03-30             | 0                         |
| 110  | 436414    | EPI_ISL_436414      | West Bengal    | 99.9297                      | 99.8535                   | 99.93                 |               |                    |                       | 2020-03-31             | 1                         |
| 111  | 436415    | EPI_ISL_436415      | Delhi          | 99.8728                      | 99.7209                   | 99.87                 |               |                    |                       | 2020-03-31             | 1                         |
| 112  | 436417    | EPI_ISL_436417      | Bihar          | 99.9561                      | 99.9018                   | 99.96                 |               |                    |                       | 2020-03-31             | 0                         |
| 113  | 436418    | EPI_ISL_436418      | Tamil Nadu     | 99.9161                      | 99.7834                   | 99.93                 |               |                    |                       | 2020-03-31             | 0                         |
| 114  | 436419    | EPI_ISL_436419      | Bihar          | 99.9293                      | 99.8179                   | 99.94                 |               |                    |                       | 2020-03-31             | 1                         |
| 115  | 436420    | EPI_ISL_436420      | Rajasthan      | 99.9498                      | 99.8744                   | 99.95                 |               |                    |                       | 2020-03-31             | 0                         |
| 116  | 436421    | EPI_ISL_436421      | Assam          | 99.9296                      | 99.8116                   | 99.93                 |               |                    |                       | 2020-03-31             | 1                         |
| 117  | 436422    | EPI_ISL_436422      | Assam          | 99.9196                      | 99.7907                   | 99.92                 |               |                    |                       | 2020-03-31             | 0                         |
| 118  | 436424    | EPI_ISL_436424      | Delhi          | 99.9029                      | 99.7767                   | 99.9                  |               |                    |                       | 2020-04-05             | 0                         |
| 119  | 436425    | EPI_ISL_436425      | Delhi          | 99.9464                      | 99.8953                   | 99.95                 |               |                    |                       | 2020-04-05             | 1                         |
| 120  | 436426    | EPI_ISL_436426      | Delhi          | 99.9196                      | 99.8535                   | 99.92                 |               |                    |                       | 2020-04-05             | 2                         |
| 121  | 436428    | EPI_ISL_436428      | Delhi          | 99.9363                      | 99.8744                   | 99.94                 |               |                    |                       | 2020-04-05             | 0                         |
| 122  | 436429    | EPI_ISL_436429      | Delhi          | 99.9129                      | 99.8116                   | 99.91                 |               |                    |                       | 2020-04-05             | 0                         |
| 123  | 436430    | EPI_ISL_436430      | Delhi          | 99.953                       | 99.8743                   | 99.96                 |               |                    |                       | 2020-04-05             | 0                         |
| 124  | 436431    | EPI_ISL_436431      | Delhi          | 99.9364                      | 99.8395                   | 99.94                 |               |                    |                       | 2020-04-05             | 0                         |
| 125  | 436432    | EPI_ISL_436432      | Delhi          | 99.8987                      | 99.7615                   | 99.91                 |               |                    |                       | 2020-04-05             | 2                         |
| 126  | 436433    | EPI_ISL_436433      | Delhi          | 99.9296                      | 99.8465                   | 99.93                 |               |                    |                       | 2020-04-05             | 0                         |
| 127  | 436434    | EPI_ISL_436434      | Delhi          | 99.767                       | 99.4667                   | 99.78                 |               |                    |                       | 2020-04-05             | 1                         |
| 128  | 436435    | EPI_ISL_436435      | Delhi          | 99.8996                      | 99.7558                   | 99.9                  |               |                    |                       | 2020-04-09             | 0                         |
| 129  | 436436    | EPI_ISL_436436      | Delhi          | 99.8851                      | 99.7052                   | 99.89                 |               |                    |                       | 2020-04-06             | 0                         |
| 130  | 436437    | EPI_ISL_436437      | Delhi          | 99.8822                      | 99.7343                   | 99.89                 |               |                    |                       | 2020-04-08             | 0                         |
| 131  | 436440    | EPI_ISL_436440      | Andhra Pradesh | 99.9531                      | 99.8744                   | 99.95                 |               |                    |                       | 2020-04-09             | 1                         |
| 132  | 436444    | EPI_ISL_436444      | Maharashtra    | 99.8292                      | 99.6232                   | 99.83                 |               |                    |                       | 2020-04-09             | 1                         |
| 133  | 436445    | EPI_ISL_436445      | Delhi          | 99.9062                      | 99.7558                   | 99.91                 |               |                    |                       | 2020-04-09             | 0                         |
| 134  | 436447    | EPI_ISL_436447      | Karnataka      | 99.9397                      | 99.8814                   | 99.94                 |               |                    |                       | 2020-04-10             | 0                         |
| 135  | 436448    | EPI_ISL_436448      | Delhi          | 99.9531                      | 99.8744                   | 99.95                 |               |                    |                       | 2020-04-12             | 0                         |
| 136  | 436449    | EPI_ISL_436449      | Bihar          | 99.933                       | 99.8395                   | 99.93                 |               |                    |                       | 2020-04-12             | 2                         |
| 137  | 436450    | EPI_ISL_436450      | Delhi          | 99.9498                      | 99.8884                   | 99.95                 |               |                    |                       | 2020-04-13             | 3                         |
| 138  | 436451    | EPI_ISL_436451      | Delhi          | 99.9397                      | 99.8535                   | 99.94                 |               |                    |                       | 2020-04-13             | 0                         |
| 139  | 436452    | EPI_ISL_436452      | Delhi          | 99.9632                      | 99.9163                   | 99.96                 |               |                    |                       | 2020-04-14             | 1                         |
| 140  | 436453    | EPI_ISL_436453      | Madhya Pradesh | 99.9189                      | 99.8386                   | 99.92                 |               |                    |                       | 2020-04-16             | 0                         |
| 141  | 436454    | EPI_ISL_436454      | Delhi          | 99.9531                      | 99.9233                   | 99.95                 |               |                    |                       | 2020-04-13             | 2                         |
| 142  | 436455    | EPI_ISL_436455      | Delhi          | 99.9598                      | 99.9233                   | 99.96                 |               |                    |                       | 2020-04-13             | 0                         |
| 143  | 436456    | EPI_ISL_436456      | Madhya Pradesh | 99.9665                      | 99.9512                   | 99.97                 |               |                    |                       | 2020-04-20             | 1                         |
| 144  | 436457    | EPI_ISL_436457      | Madhya Pradesh | 99.9699                      | 99.9651                   | 99.97                 |               |                    |                       | 2020-04-20             | 2                         |
| 145  | 436458    | EPI_ISL_436458      | Madhya Pradesh | 99.9296                      | 99.8046                   | 99.93                 |               |                    |                       | 2020-04-16             | 1                         |
| 146  | 436459    | EPI_ISL_436459      | Madhya Pradesh | 99.9498                      | 99.9233                   | 99.95                 |               |                    |                       | 2020-04-20             | 3                         |
| 147  | 436460    | EPI_ISL_436460      | Madhya Pradesh | 99.933                       | 99.8674                   | 99.93                 |               |                    |                       | 2020-04-20             | 0                         |
| 148  | 436461    | EPI_ISL_436461      | Madhya Pradesh | 99.9598                      | 99.9233                   | 99.96                 |               |                    |                       | 2020-04-20             | 0                         |
| 149  | 436462    | EPI_ISL_436462      | Madhya Pradesh | 99.9531                      | 99.9302                   | 99.95                 |               |                    |                       | 2020-04-16             | 0                         |
| 150  | 436463    | EPI_ISL_436463      | Madhya Pradesh | 99.8817                      | 99.6702                   | 99.87                 |               |                    |                       | 2020-04-16             | 0                         |
| 151  | 437438    | EPI_ISL_437438      | Gujarat        | 99.9597                      | 99.8883                   | 99.97                 |               |                    |                       | 2020-04-24             | 4                         |
| 152  | 437440    | EPI_ISL_437440      | Gujarat        | 99.9598                      | 99.9232                   | 99.95                 | Male          | 7 Released         |                       | 2020-04-26             | 5                         |
| 153  | 437441    | EPI_ISL_437441      | Gujarat        | 99.9663                      | 99.8734                   | 99.71                 |               |                    |                       | 2020-04-26             | 4                         |
| 154  | 437442    | EPI_ISL_437442      | Gujarat        | 99.936                       | 99.8597                   | 99.94                 | Female        | 7 Released         |                       | 2020-04-27             | 2                         |
| 155  | 437444    | EPI_ISL_437444      | Gujarat        | 99.9732                      | 99.9512                   | 99.97                 |               |                    |                       | 2020-04-26             | 2                         |
| 156  | 437445    | EPI_ISL_437445      | Gujarat        | 99.9531                      | 99.9372                   | 99.95                 | Female        | 29 Released        |                       | 2020-04-26             | 7                         |
| 157  | 437446    | EPI_ISL_437446      | Gujarat        | 99.9564                      | 99.9442                   | 99.96                 | Female        | 29 Released        |                       | 2020-04-26             | 6                         |
| 158  | 437447    | EPI_ISL_437447      | Gujarat        | 99.9798                      | 99.958                    | 99.92                 | Male          | 42 Released        |                       | 2020-04-26             | 1                         |
| 159  | 437448    | EPI_ISL_437448      | Gujarat        | 99.9832                      | 99.986                    | 99.98                 | Female        | 40 Released        |                       | 2020-04-26             | 1                         |
| 160  | 437449    | EPI_ISL_437449      | Gujarat        | 99.9698                      | 99.9651                   | 99.97                 | Female        | 17 Released        |                       | 2020-04-26             | 4                         |
| 161  | 437450    | EPI_ISL_437450      | Gujarat        | 99.9832                      | 99.965                    | 99.99                 | Female        | 36 Released        |                       | 2020-04-26             | 1                         |
| 162  | 437451    | EPI_ISL_437451      | Gujarat        | 99.9732                      | 99.9651                   | 99.87                 |               |                    |                       | 2020-04-26             | 3                         |
| 163  | 437452    | EPI_ISL_437452      | Gujarat        | 99.9497                      | 99.9302                   | 99.95                 | Female        | 12 Released        |                       | 2020-04-26             | 8                         |
| 164  | 437453    | EPI_ISL_437453      | Gujarat        | 99.9765                      | 99.9372                   | 99.98                 | Female        | 52 Deceased        |                       | 2020-04-26             | 1                         |
| 165  | 437454    | EPI_ISL_437454      | Gujarat        | 99.9397                      | 99.8814                   | 99.94                 | Female        | 52 Deceased        |                       | 2020-04-26             | 7                         |
| 166  | 437539    | EPI_ISL_437539      | West Bengal    | 99.9799                      | 99.9791                   | 99.98                 |               |                    |                       | 2020-04-06             | 0                         |
| 167  | 437626    | EPI_ISL_437626      | Telangana      | 99.9699                      | 99.9721                   | 99.97                 | Male          | 70 Hospitaliz      |                       | 2020-03-24             | 1                         |
| 168  | 438138    | EPI_ISL_438138      | Telangana      | 99.9732                      | 99.9512                   | 99.97                 | Male          | 63 Hospitaliz      |                       | 2020-03-25             | 0                         |
| 169  | 438139    | EPI_ISL_438139      | Telangana      | 99.9799                      | 99.9512                   | 99.98                 | Female        | 63 Hospitaliz      |                       | 2020-03-25             | 0                         |
| 170  | 444456    | EPI_ISL_444456      | Gujarat        | 99.9732                      | 99.9651                   | 99.97                 | Female        | 43 Released        |                       | 2020-04-26             | 3                         |
| 171  | 444457    | EPI_ISL_444457      | Gujarat        | 99.9732                      | 99.9651                   | 99.97                 | Male          | 40 Released        |                       | 2020-04-26             | 3                         |
| 172  | 444458    | EPI_ISL_444458      | Gujarat        | 99.9732                      | 99.9651                   | 99.97                 | Male          | 35 Released        |                       | 2020-04-26             | 3                         |
| 173  | 444459    | EPI_ISL_444459      | Gujarat        | 99.9564                      | 99.9512                   | 99.96                 | Male          | 48 Released        |                       | 2020-04-30             | 7                         |
| 174  | 444460    | EPI_ISL_444460      | Gujarat        | 99.9833                      | 99.986                    | 99.98                 | Male          | 37 Released        |                       | 2020-04-30             | 1                         |
| 175  | 444461    | EPI_ISL_444461      | Gujarat        | 99.9665                      | 99.9651                   | 99.97                 |               |                    |                       | 2020-04-29             | 4                         |
| 176  | 444462    | EPI_ISL_444462      | Gujarat        | 99.9698                      | 99.9512                   | 99.97                 | Female        | 28 Released        |                       | 2020-04-29             | 4                         |
| 177  | 444463    | EPI_ISL_444463      | Gujarat        | 99.9799                      | 99.9791                   | 99.98                 |               |                    |                       | 2020-04-29             | 2                         |
| 178  | 444464    | EPI_ISL_444464      | Gujarat        | 99.9564                      | 99.9442                   | 99.96                 |               |                    |                       | 2020-04-29             | 7                         |
| 179  | 444465    | EPI_ISL_444465      | Gujarat        | 99.9598                      | 99.9581                   | 99.96                 | Male          | 53 Released        |                       | 2020-04-29             | 5                         |

Supplementary file 4: Age, Gender and Location data for corresponding 611 SARS-Cov-2 genomes

| S No | Genome ID | GISAID Accession ID | State     | Genome                       |                           | NCBI BLAST Per. ident | GISAID Gender | GISAID Patient age | GISAID Patient status | GISAID Collection date | Sum of Mutation Incidence |
|------|-----------|---------------------|-----------|------------------------------|---------------------------|-----------------------|---------------|--------------------|-----------------------|------------------------|---------------------------|
|      |           |                     |           | Detective AA NT Identity (%) | Detective AA Identity (%) |                       |               |                    |                       |                        |                           |
| 180  | 444466    | EPI_ISL_444466      | Gujarat   | 99.9631                      | 99.9581                   | 99.96                 | Male          | 35                 | Released              | 2020-04-29             | 5                         |
| 181  | 444467    | EPI_ISL_444467      | Gujarat   | 99.9665                      | 99.9651                   | 99.97                 |               |                    |                       | 2020-04-29             | 4                         |
| 182  | 444468    | EPI_ISL_444468      | Gujarat   | 99.9832                      | 99.9721                   | 99.98                 | Female        | 60                 | Released              | 2020-04-29             | 1                         |
| 183  | 444469    | EPI_ISL_444469      | Gujarat   | 99.9564                      | 99.9372                   | 99.96                 | Male          | 37                 | Released              | 2020-04-29             | 5                         |
| 184  | 444470    | EPI_ISL_444470      | Gujarat   | 99.9665                      | 99.9651                   | 99.97                 |               |                    |                       | 2020-04-29             | 4                         |
| 185  | 444471    | EPI_ISL_444471      | Gujarat   | 99.9765                      | 99.9791                   | 99.98                 | Female        | 34                 | Released              | 2020-04-29             | 2                         |
| 186  | 444472    | EPI_ISL_444472      | Gujarat   | 99.9665                      | 99.9651                   | 99.97                 |               |                    |                       | 2020-04-29             | 4                         |
| 187  | 444473    | EPI_ISL_444473      | Gujarat   | 99.9832                      | 99.9791                   | 99.98                 |               |                    |                       | 2020-04-29             | 1                         |
| 188  | 444474    | EPI_ISL_444474      | Gujarat   | 99.9665                      | 99.9651                   | 99.97                 | Female        | 52                 | Released              | 2020-04-29             | 4                         |
| 189  | 444475    | EPI_ISL_444475      | Gujarat   | 99.9698                      | 99.9512                   | 99.97                 | Male          | 20                 | Released              | 2020-04-29             | 4                         |
| 190  | 444476    | EPI_ISL_444476      | Gujarat   | 99.9564                      | 99.9512                   | 99.96                 | Female        | 24                 | Released              | 2020-04-29             | 6                         |
| 191  | 444477    | EPI_ISL_444477      | Gujarat   | 99.9765                      | 99.9791                   | 99.98                 | Male          | 60                 | Deceased              | 2020-04-29             | 3                         |
| 192  | 444478    | EPI_ISL_444478      | Gujarat   | 99.9765                      | 99.9441                   | 99.98                 |               |                    |                       | 2020-04-30             | 3                         |
| 193  | 444479    | EPI_ISL_444479      | Gujarat   | 99.9799                      | 99.9791                   | 99.98                 |               |                    |                       | 2020-04-29             | 2                         |
| 194  | 444480    | EPI_ISL_444480      | Gujarat   | 99.9598                      | 99.9581                   | 99.96                 | Male          | 60                 | Deceased              | 2020-04-30             | 3                         |
| 195  | 444481    | EPI_ISL_444481      | Gujarat   | 99.9866                      | 99.986                    | 99.99                 | Female        | 55                 | Released              | 2020-04-30             | 0                         |
| 196  | 444482    | EPI_ISL_444482      | Gujarat   | 99.9732                      | 99.9651                   | 99.97                 | Male          | 18                 | Released              | 2020-05-02             | 2                         |
| 197  | 444483    | EPI_ISL_444483      | Gujarat   | 99.9833                      | 99.9721                   | 99.98                 | Male          | 30                 | Deceased              | 2020-05-02             | 1                         |
| 198  | 444484    | EPI_ISL_444484      | Gujarat   | 99.9698                      | 99.972                    | 99.97                 | Male          | 28                 | Released              | 2020-05-04             | 3                         |
| 199  | 444485    | EPI_ISL_444485      | Gujarat   | 99.9698                      | 99.958                    | 99.97                 |               |                    |                       | 2020-05-04             | 3                         |
| 200  | 444486    | EPI_ISL_444486      | Gujarat   | 99.9598                      | 99.9442                   | 99.96                 | Male          | 55                 | Released              | 2020-05-04             | 6                         |
| 201  | 447030    | EPI_ISL_447030      | Gujarat   | 99.9732                      | 99.9512                   | 99.97                 | Female        | 65                 | Released              | 2020-05-03             | 2                         |
| 202  | 447031    | EPI_ISL_447031      | Gujarat   | 99.9866                      | 99.986                    | 99.99                 | Female        | 65                 | Released              | 2020-05-03             | 0                         |
| 203  | 447032    | EPI_ISL_447032      | Gujarat   | 99.9798                      | 99.9511                   | 99.98                 |               |                    |                       | 2020-05-03             | 0                         |
| 204  | 447033    | EPI_ISL_447033      | Gujarat   | 99.9598                      | 99.9512                   | 99.96                 | Male          | 40                 | Released              | 2020-05-03             | 5                         |
| 205  | 447034    | EPI_ISL_447034      | Gujarat   | 99.9529                      | 99.93                     | 99.97                 | Male          | 78                 | Released              | 2020-05-03             | 5                         |
| 206  | 447035    | EPI_ISL_447035      | Gujarat   | 99.9631                      | 99.9581                   | 99.96                 | Female        | 78                 | Deceased              | 2020-05-03             | 5                         |
| 207  | 447036    | EPI_ISL_447036      | Gujarat   | 99.9698                      | 99.9511                   | 99.95                 |               |                    |                       | 2020-05-03             | 3                         |
| 208  | 447037    | EPI_ISL_447037      | Gujarat   | 99.9665                      | 99.9721                   | 99.97                 |               |                    |                       | 2020-05-03             | 5                         |
| 209  | 447038    | EPI_ISL_447038      | Gujarat   | 99.9799                      | 99.9651                   | 99.98                 | Female        | 34                 | Released              | 2020-05-03             | 0                         |
| 210  | 447039    | EPI_ISL_447039      | Gujarat   | 99.9631                      | 99.9651                   | 99.96                 | Female        | 52                 | Released              | 2020-05-03             | 4                         |
| 211  | 447040    | EPI_ISL_447040      | Gujarat   | 99.9564                      | 99.9512                   | 99.96                 |               |                    |                       | 2020-05-03             | 4                         |
| 212  | 447041    | EPI_ISL_447041      | Gujarat   | 99.9698                      | 99.9721                   | 99.97                 |               |                    |                       | 2020-05-03             | 3                         |
| 213  | 447042    | EPI_ISL_447042      | Gujarat   | 99.9463                      | 99.9442                   | 99.9                  | Male          | 24                 | Released              | 2020-05-03             | 3                         |
| 214  | 447043    | EPI_ISL_447043      | Gujarat   | 99.9564                      | 99.9372                   | 99.96                 | Female        | 42                 | Released              | 2020-05-03             | 6                         |
| 215  | 447044    | EPI_ISL_447044      | Gujarat   | 99.9598                      | 99.9512                   | 99.96                 | Female        | 42                 | Released              | 2020-05-03             | 5                         |
| 216  | 447045    | EPI_ISL_447045      | Gujarat   | 99.9598                      | 99.9442                   | 99.96                 | Male          | 28                 | Released              | 2020-05-03             | 5                         |
| 217  | 447046    | EPI_ISL_447046      | Gujarat   | 99.9564                      | 99.9512                   | 99.96                 |               |                    |                       | 2020-05-04             | 6                         |
| 218  | 447047    | EPI_ISL_447047      | Gujarat   | 99.9866                      | 99.986                    | 99.99                 |               |                    |                       | 2020-04-29             | 0                         |
| 219  | 447048    | EPI_ISL_447048      | Gujarat   | 99.9531                      | 99.9372                   | 99.95                 | Female        | 70                 | Released              | 2020-04-27             | 5                         |
| 220  | 447049    | EPI_ISL_447049      | Gujarat   | 99.9598                      | 99.9512                   | 99.96                 |               |                    |                       | 2020-04-29             | 6                         |
| 221  | 447050    | EPI_ISL_447050      | Gujarat   | 99.9631                      | 99.9581                   | 99.96                 |               |                    |                       | 2020-04-29             | 5                         |
| 222  | 447051    | EPI_ISL_447051      | Gujarat   | 99.9631                      | 99.9581                   | 99.96                 |               |                    |                       | 2020-04-29             | 5                         |
| 223  | 447052    | EPI_ISL_447052      | Gujarat   | 99.9799                      | 99.9791                   | 99.98                 |               |                    |                       | 2020-05-02             | 2                         |
| 224  | 447053    | EPI_ISL_447053      | Gujarat   | 99.9631                      | 99.9581                   | 99.96                 | Male          | 66                 | Deceased              | 2020-04-29             | 3                         |
| 225  | 447534    | EPI_ISL_447534      | Gujarat   | 99.9665                      | 99.9721                   | 99.97                 | Female        | 9                  | Released              | 2020-05-05             | 4                         |
| 226  | 447535    | EPI_ISL_447535      | Gujarat   | 99.9665                      | 99.9651                   | 99.97                 | Male          | 30                 | Released              | 2020-05-05             | 3                         |
| 227  | 447536    | EPI_ISL_447536      | Gujarat   | 99.9731                      | 99.9581                   | 99.83                 | Male          | 68                 | Released              | 2020-05-05             | 4                         |
| 228  | 447537    | EPI_ISL_447537      | Gujarat   | 99.9563                      | 99.8952                   | 99.81                 | Male          | 68                 | Released              | 2020-05-05             | 6                         |
| 229  | 447538    | EPI_ISL_447538      | Gujarat   | 99.9731                      | 99.9721                   | 99.97                 |               |                    |                       | 2020-05-05             | 4                         |
| 230  | 447539    | EPI_ISL_447539      | Gujarat   | 99.9664                      | 99.9651                   | 99.97                 |               |                    |                       | 2020-05-05             | 5                         |
| 231  | 447540    | EPI_ISL_447540      | Gujarat   | 99.9698                      | 99.9721                   | 99.97                 |               |                    |                       | 2020-05-05             | 3                         |
| 232  | 447541    | EPI_ISL_447541      | Gujarat   | 99.9665                      | 99.9581                   | 99.97                 |               |                    |                       | 2020-05-05             | 3                         |
| 233  | 447542    | EPI_ISL_447542      | Gujarat   | 99.9665                      | 99.9581                   | 99.97                 | Male          | 33                 | Released              | 2020-05-05             | 3                         |
| 234  | 447543    | EPI_ISL_447543      | Gujarat   | 99.9698                      | 99.9721                   | 99.97                 | Male          | 33                 | Released              | 2020-05-05             | 3                         |
| 235  | 447544    | EPI_ISL_447544      | Gujarat   | 99.9832                      | 99.9721                   | 99.98                 | Male          | 14                 | Released              | 2020-05-05             | 1                         |
| 236  | 447545    | EPI_ISL_447545      | Gujarat   | 99.9832                      | 99.9721                   | 99.98                 | Female        | 25                 | Released              | 2020-05-05             | 1                         |
| 237  | 447546    | EPI_ISL_447546      | Gujarat   | 99.9631                      | 99.9512                   | 99.96                 | Male          | 10                 | Released              | 2020-05-05             | 5                         |
| 238  | 447547    | EPI_ISL_447547      | Gujarat   | 99.9799                      | 99.9791                   | 99.98                 |               |                    |                       | 2020-04-28             | 2                         |
| 239  | 447548    | EPI_ISL_447548      | Gujarat   | 99.9598                      | 99.9512                   | 99.96                 | Female        | 44                 | Released              | 2020-04-28             | 5                         |
| 240  | 447549    | EPI_ISL_447549      | Gujarat   | 99.9799                      | 99.986                    | 99.98                 |               |                    |                       | 2020-05-03             | 2                         |
| 241  | 447550    | EPI_ISL_447550      | Gujarat   | 99.9799                      | 99.986                    | 99.98                 |               |                    |                       | 2020-05-03             | 1                         |
| 242  | 447551    | EPI_ISL_447551      | Gujarat   | 99.9799                      | 99.986                    | 99.98                 | Female        | 52                 | Released              | 2020-04-25             | 2                         |
| 243  | 447552    | EPI_ISL_447552      | Gujarat   | 99.9598                      | 99.9512                   | 99.96                 | Male          | 39                 | Released              | 2020-05-02             | 4                         |
| 244  | 447553    | EPI_ISL_447553      | Gujarat   | 99.9631                      | 99.9512                   | 99.96                 | Male          | 13                 | Released              | 2020-04-27             | 5                         |
| 245  | 447554    | EPI_ISL_447554      | Gujarat   | 99.9866                      | 99.986                    | 99.99                 | Male          | 39                 | Released              | 2020-04-26             | 0                         |
| 246  | 447555    | EPI_ISL_447555      | Gujarat   | 99.9765                      | 99.9791                   | 99.98                 | Male          | 6                  | Released              | 2020-04-28             | 2                         |
| 247  | 447556    | EPI_ISL_447556      | Telangana | 99.9766                      | 99.9442                   | 99.98                 |               |                    |                       | 2020-03-30             | 0                         |
| 248  | 447557    | EPI_ISL_447557      | Telangana | 99.9699                      | 99.9512                   | 99.97                 |               |                    |                       | 2020-03-30             | 0                         |
| 249  | 447558    | EPI_ISL_447558      | Telangana | 99.9833                      | 99.9651                   | 99.98                 |               |                    |                       | 2020-03-30             | 0                         |
| 250  | 447559    | EPI_ISL_447559      | Telangana | 99.9766                      | 99.9233                   | 99.98                 |               |                    |                       | 2020-03-31             | 0                         |
| 251  | 447560    | EPI_ISL_447560      | Telangana | 99.9833                      | 99.9512                   | 99.98                 |               |                    |                       | 2020-03-31             | 0                         |
| 252  | 447561    | EPI_ISL_447561      | Telangana | 99.9732                      | 99.9233                   | 99.97                 |               |                    |                       | 2020-03-31             | 0                         |
| 253  | 447562    | EPI_ISL_447562      | Telangana | 99.9833                      | 99.9512                   | 99.98                 |               |                    |                       | 2020-03-31             | 0                         |
| 254  | 447563    | EPI_ISL_447563      | Telangana | 99.9699                      | 99.9163                   | 99.97                 |               |                    |                       | 2020-03-31             | 4                         |
| 255  | 447564    | EPI_ISL_447564      | Telangana | 99.9833                      | 99.9512                   | 99.98                 |               |                    |                       | 2020-04-01             | 0                         |
| 256  | 447565    | EPI_ISL_447565      | Telangana | 99.9899                      | 99.9791                   | 99.99                 |               |                    |                       | 2020-04-01             | 0                         |
| 257  | 447566    | EPI_ISL_447566      | Telangana | 99.9766                      | 99.9442                   | 99.98                 |               |                    |                       | 2020-04-01             | 0                         |
| 258  | 447567    | EPI_ISL_447567      | Telangana | 99.9665                      | 99.9372                   | 99.97                 |               |                    |                       | 2020-04-01             | 0                         |
| 259  | 447568    | EPI_ISL_447568      | Telangana | 99.9565                      | 99.9233                   | 99.96                 |               |                    |                       | 2020-04-01             | 2                         |
| 260  | 447569    | EPI_ISL_447569      | Telangana | 99.9732                      | 99.9233                   | 99.97                 |               |                    |                       | 2020-04-01             | 1                         |
| 261  | 447570    | EPI_ISL_447570      | Telangana | 99.9498                      | 99.9093                   | 99.95                 |               |                    |                       | 2020-04-01             | 1                         |
| 262  | 447571    | EPI_ISL_447571      | Telangana | 99.9766                      | 99.9372                   | 99.98                 |               |                    |                       | 2020-04-01             | 1                         |
| 263  | 447572    | EPI_ISL_447572      | Telangana | 99.9766                      | 99.9372                   | 99.98                 |               |                    |                       | 2020-04-01             | 1                         |
| 264  | 447573    | EPI_ISL_447573      | Telangana | 99.9598                      | 99.9163                   | 99.96                 |               |                    |                       | 2020-04-01             | 3                         |
| 265  | 447574    | EPI_ISL_447574      | Telangana | 99.9832                      | 99.9512                   | 99.98                 |               |                    |                       | 2020-04-01             | 0                         |
| 266  | 447575    | EPI_ISL_447575      | Telangana | 99.9699                      | 99.9233                   | 99.97                 |               |                    |                       | 2020-04-02             | 0                         |
| 267  | 447576    | EPI_ISL_447576      | Telangana | 99.9598                      | 99.9163                   | 99.96                 |               |                    |                       | 2020-04-02             | 3                         |
| 268  | 447577    | EPI_ISL_447577      | Telangana | 99.9799                      | 99.9372                   | 99.98                 | Female        | 20                 | Discharge             | 2020-04-02             | 0                         |
| 269  | 447578    | EPI_ISL_447578      | Telangana | 99.9766                      | 99.9512                   | 99.98                 |               |                    |                       | 2020-04-02             | 2                         |

| S No | Genome ID | GISAID Accession ID | State       | Genome                           |                           |                       | GISAID Patient age | GISAID Patient status | GISAID Collection date | Sum of Mutation Incidence |
|------|-----------|---------------------|-------------|----------------------------------|---------------------------|-----------------------|--------------------|-----------------------|------------------------|---------------------------|
|      |           |                     |             | Genome Detective NT Identity (%) | Detective AA Identity (%) | NCBI BLAST Per. ident |                    |                       |                        |                           |
| 270  | 447579    | EPI_ISL_447579      | Telangana   | 99.9598                          | 99.9233                   | 99.96                 |                    |                       | 2020-04-10             | 2                         |
| 271  | 447580    | EPI_ISL_447580      | Telangana   | 99.9732                          | 99.9093                   | 99.97                 |                    |                       | 2020-04-13             | 2                         |
| 272  | 447581    | EPI_ISL_447581      | Telangana   | 99.9464                          | 99.9163                   | 99.95                 |                    |                       | 2020-04-14             | 2                         |
| 273  | 447582    | EPI_ISL_447582      | Telangana   | 99.9833                          | 99.9512                   | 99.98                 |                    |                       | 2020-04-14             | 0                         |
| 274  | 447583    | EPI_ISL_447583      | Telangana   | 99.9766                          | 99.9372                   | 99.98                 |                    |                       | 2020-04-16             | 2                         |
| 275  | 447584    | EPI_ISL_447584      | Tamil Nadu  | 99.9766                          | 99.9302                   | 99.98                 |                    |                       | 2020-04-16             | 1                         |
| 276  | 447585    | EPI_ISL_447585      | Tamil Nadu  | 99.9766                          | 99.9302                   | 99.98                 |                    |                       | 2020-04-16             | 1                         |
| 277  | 447586    | EPI_ISL_447586      | Tamil Nadu  | 99.9699                          | 99.9302                   | 99.97                 |                    |                       | 2020-04-16             | 1                         |
| 278  | 447587    | EPI_ISL_447587      | Tamil Nadu  | 99.9598                          | 99.9372                   | 99.96                 |                    |                       | 2020-04-20             | 4                         |
| 279  | 447847    | EPI_ISL_447847      | Telangana   | 99.9732                          | 99.9372                   | 99.97                 |                    |                       | 2020-03-31             | 0                         |
| 280  | 447848    | EPI_ISL_447848      | Telangana   | 99.9732                          | 99.9442                   | 99.97                 |                    |                       | 2020-04-01             | 2                         |
| 281  | 447849    | EPI_ISL_447849      | Telangana   | 99.9765                          | 99.9372                   | 99.98                 |                    |                       | 2020-04-01             | 1                         |
| 282  | 447850    | EPI_ISL_447850      | Telangana   | 99.9765                          | 99.9442                   | 99.98                 |                    |                       | 2020-04-01             | 0                         |
| 283  | 447851    | EPI_ISL_447851      | Telangana   | 99.9799                          | 99.9442                   | 99.98                 |                    |                       | 2020-04-01             | 1                         |
| 284  | 447852    | EPI_ISL_447852      | Telangana   | 99.9732                          | 99.9163                   | 99.97                 |                    |                       | 2020-04-01             | 1                         |
| 285  | 447853    | EPI_ISL_447853      | Telangana   | 99.9832                          | 99.9512                   | 99.98                 |                    |                       | 2020-04-01             | 2                         |
| 286  | 447854    | EPI_ISL_447854      | Telangana   | 99.9799                          | 99.9372                   | 99.98                 | Male               | 21 Discharge          | 2020-04-02             | 0                         |
| 287  | 447855    | EPI_ISL_447855      | Telangana   | 99.9732                          | 99.9233                   | 99.97                 | Female             | 26 Discharge          | 2020-04-02             | 0                         |
| 288  | 447856    | EPI_ISL_447856      | Telangana   | 99.9799                          | 99.9442                   | 99.98                 |                    |                       | 2020-04-02             | 0                         |
| 289  | 447857    | EPI_ISL_447857      | Telangana   | 99.9732                          | 99.9233                   | 99.97                 |                    |                       | 2020-04-02             | 0                         |
| 290  | 447858    | EPI_ISL_447858      | Telangana   | 99.9732                          | 99.9302                   | 99.97                 |                    |                       | 2020-04-06             | 2                         |
| 291  | 447859    | EPI_ISL_447859      | Telangana   | 99.9632                          | 99.8953                   | 99.96                 |                    |                       | 2020-04-15             | 1                         |
| 292  | 447860    | EPI_ISL_447860      | Telangana   | 99.9799                          | 99.9512                   | 99.98                 |                    |                       | 2020-04-16             | 0                         |
| 293  | 447861    | EPI_ISL_447861      | Telangana   | 99.9832                          | 99.9512                   | 99.98                 |                    |                       | 2020-04-16             | 0                         |
| 294  | 447862    | EPI_ISL_447862      | Telangana   | 99.9732                          | 99.9233                   | 99.97                 |                    |                       | 2020-03-31             | 0                         |
| 295  | 447863    | EPI_ISL_447863      | Telangana   | 99.9732                          | 99.9233                   | 99.97                 |                    |                       | 2020-04-14             | 0                         |
| 296  | 447864    | EPI_ISL_447864      | Telangana   | 99.9564                          | 99.8953                   | 99.96                 |                    |                       | 2020-04-16             | 6                         |
| 297  | 447865    | EPI_ISL_447865      | Telangana   | 99.9765                          | 99.9233                   | 99.98                 |                    |                       | 2020-04-14             | 0                         |
| 298  | 447866    | EPI_ISL_447866      | Telangana   | 99.9564                          | 99.8884                   | 99.96                 |                    |                       | 2020-04-14             | 6                         |
| 299  | 450321    | EPI_ISL_450321      | Maharashtra | 99.9765                          | 99.9233                   | 99.98                 | Male               | 57 Hospitaliz         | 2020-04-04             | 0                         |
| 300  | 450322    | EPI_ISL_450322      | Maharashtra | 99.9799                          | 99.9512                   | 99.98                 | Male               | 35 Hospitaliz         | 2020-04-04             | 0                         |
| 301  | 450323    | EPI_ISL_450323      | Maharashtra | 99.9866                          | 99.986                    | 99.99                 | Female             | 44 Hospitaliz         | 2020-03-27             | 0                         |
| 302  | 450324    | EPI_ISL_450324      | Maharashtra | 99.9799                          | 99.9791                   | 99.98                 | Female             | 65 Hospitaliz         | 2020-03-26             | 3                         |
| 303  | 450325    | EPI_ISL_450325      | Maharashtra | 99.9799                          | 99.9721                   | 99.98                 | Male               | 37 Hospitaliz         | 2020-03-17             | 1                         |
| 304  | 450326    | EPI_ISL_450326      | Telangana   | 99.9732                          | 99.9233                   | 99.91                 | Male               | 40 -                  | 2020-04-01             | 0                         |
| 305  | 450327    | EPI_ISL_450327      | Telangana   | 99.9833                          | 99.9512                   | 99.98                 | Male               | 56 -                  | 2020-04-01             | 0                         |
| 306  | 450328    | EPI_ISL_450328      | Telangana   | 99.9799                          | 99.9512                   | 99.98                 |                    |                       | 2020-04-01             | 0                         |
| 307  | 450329    | EPI_ISL_450329      | Telangana   | 99.9832                          | 99.9512                   | 99.98                 |                    |                       | 2020-04-01             | 0                         |
| 308  | 450330    | EPI_ISL_450330      | Telangana   | 99.9732                          | 99.9372                   | 99.97                 | Female             | 22 -                  | 2020-04-02             | 0                         |
| 309  | 450331    | EPI_ISL_450331      | Telangana   | 99.9832                          | 99.9512                   | 99.98                 | Male               | 37 -                  | 2020-04-01             | 0                         |
| 310  | 450332    | EPI_ISL_450332      | Telangana   | 99.9799                          | 99.9372                   | 99.98                 | Male               | 51 -                  | 2020-04-01             | 0                         |
| 311  | 450781    | EPI_ISL_450781      | Gujarat     | 99.9665                          | 99.9581                   | 99.97                 | Male               | 24 Released,          | 2020-05-09             | 5                         |
| 312  | 450782    | EPI_ISL_450782      | Gujarat     | 99.9698                          | 99.9651                   | 99.97                 |                    |                       | 2020-04-11             | 4                         |
| 313  | 450783    | EPI_ISL_450783      | Gujarat     | 99.9564                          | 99.9442                   | 99.96                 | Female             | unknown Released      | 2020-04-11             | 6                         |
| 314  | 450784    | EPI_ISL_450784      | Gujarat     | 99.9429                          | 99.8601                   | 99.73                 | Male               | 17 Released,          | 2020-05-09             | 3                         |
| 315  | 450785    | EPI_ISL_450785      | Gujarat     | 99.9531                          | 99.9023                   | 99.95                 | Male               | 63 Hospitaliz         | 2020-05-10             | 5                         |
| 316  | 450786    | EPI_ISL_450786      | Gujarat     | 99.9497                          | 99.8953                   | 99.95                 | Male               | 63 Hospitaliz         | 2020-05-10             | 5                         |
| 317  | 450787    | EPI_ISL_450787      | Gujarat     | 99.9598                          | 99.8953                   | 99.96                 |                    |                       | 2020-05-11             | 3                         |
| 318  | 450788    | EPI_ISL_450788      | Gujarat     | 99.9765                          | 99.9581                   | 99.98                 | Male               | 38 Released           | 2020-05-06             | 2                         |
| 319  | 450789    | EPI_ISL_450789      | Gujarat     | 99.9698                          | 99.9651                   | 99.89                 | Female             | 55 Released,          | 2020-05-10             | 3                         |
| 320  | 450790    | EPI_ISL_450790      | Gujarat     | 99.9732                          | 99.9441                   | 99.89                 | Male               | 14 Released,          | 2020-04-28             | 5                         |
| 321  | 450791    | EPI_ISL_450791      | Gujarat     | 99.9732                          | 99.9301                   | 99.97                 | Female             | 55 Released           | 2020-04-27             | 5                         |
| 322  | 451149    | EPI_ISL_451149      | Gujarat     | 99.9564                          | 99.9512                   | 99.96                 | Male               | 55 Released,          | 2020-05-07             | 5                         |
| 323  | 451150    | EPI_ISL_451150      | Gujarat     | 99.9665                          | 99.9721                   | 99.97                 | Male               | 70 Released           | 2020-05-06             | 3                         |
| 324  | 451151    | EPI_ISL_451151      | Gujarat     | 99.9598                          | 99.9651                   | 99.96                 | Male               | 50 Released,          | 2020-05-05             | 5                         |
| 325  | 451152    | EPI_ISL_451152      | Gujarat     | 99.9531                          | 99.9512                   | 99.95                 | Female             | 42 Released,          | 2020-05-09             | 6                         |
| 326  | 451153    | EPI_ISL_451153      | Gujarat     | 99.9598                          | 99.9512                   | 99.96                 |                    |                       | 2020-05-10             | 5                         |
| 327  | 451154    | EPI_ISL_451154      | Gujarat     | 99.9698                          | 99.9302                   | 99.92                 |                    |                       | 2020-05-03             | 2                         |
| 328  | 451155    | EPI_ISL_451155      | Gujarat     | 99.9732                          | 99.9651                   | 99.97                 |                    |                       | 2020-05-03             | 2                         |
| 329  | 451156    | EPI_ISL_451156      | Gujarat     | 99.9698                          | 99.9302                   | 99.92                 |                    |                       | 2020-05-01             | 2                         |
| 330  | 451157    | EPI_ISL_451157      | Gujarat     | 99.9765                          | 99.9721                   | 99.95                 | Female             | 1 Released            | 2020-05-02             | 3                         |
| 331  | 451158    | EPI_ISL_451158      | Gujarat     | 99.9832                          | 99.986                    | 99.98                 | Male               | 72 Released,          | 2020-05-03             | 1                         |
| 332  | 451159    | EPI_ISL_451159      | Gujarat     | 99.9698                          | 99.9372                   | 99.97                 |                    |                       | 2020-05-03             | 2                         |
| 333  | 451160    | EPI_ISL_451160      | Gujarat     | 99.9765                          | 99.9791                   | 99.98                 |                    |                       | 2020-05-03             | 2                         |
| 334  | 451161    | EPI_ISL_451161      | Gujarat     | 99.9698                          | 99.9232                   | 99.88                 | Male               | 37 Released           | 2020-05-03             | 2                         |
| 335  | 451162    | EPI_ISL_451162      | Gujarat     | 99.9598                          | 99.9651                   | 99.96                 | Female             | 25 Released,          | 2020-05-03             | 6                         |
| 336  | 451163    | EPI_ISL_451163      | Gujarat     | 99.9799                          | 99.986                    | 99.98                 |                    |                       | 2020-05-02             | 2                         |
| 337  | 451666    | EPI_ISL_451666      | Gujarat     | 99.9698                          | 99.9023                   | 99.91                 | Male               | 54 Released,          | 2020-05-04             | 3                         |
| 338  | 452192    | EPI_ISL_452192      | Maharashtra | 99.9631                          | 99.9512                   | 99.97                 | Male               | 75 Mild               | 2020-04-16             | 1                         |
| 339  | 452193    | EPI_ISL_452193      | Maharashtra | 99.9597                          | 99.9372                   | 99.97                 | Male               | 1.5 Mild              | 2020-04-16             | 2                         |
| 340  | 452195    | EPI_ISL_452195      | Maharashtra | 99.9631                          | 99.9581                   | 99.97                 | Female             | 75 Mild               | 2020-04-19             | 4                         |
| 341  | 452196    | EPI_ISL_452196      | Maharashtra | 99.9664                          | 99.9581                   | 99.97                 | Female             | 12 Mild               | 2020-04-19             | 3                         |
| 342  | 452197    | EPI_ISL_452197      | Maharashtra | 99.9564                          | 99.9302                   | 99.96                 | Female             | 32 Mild               | 2020-04-19             | 4                         |
| 343  | 452198    | EPI_ISL_452198      | Maharashtra | 99.953                           | 99.9302                   | 99.96                 | Male               | 22 Mild               | 2020-04-20             | 4                         |
| 344  | 452199    | EPI_ISL_452199      | Maharashtra | 99.9564                          | 99.9302                   | 99.94                 | Female             | 65 Mild               | 2020-04-20             | 1                         |
| 345  | 452200    | EPI_ISL_452200      | Maharashtra | 99.9597                          | 99.9302                   | 99.94                 | Male               | 98 Mild               | 2020-04-20             | 3                         |
| 346  | 452201    | EPI_ISL_452201      | Maharashtra | 99.9564                          | 99.9442                   | 99.96                 | Female             | 12 Mild               | 2020-04-20             | 2                         |
| 347  | 452202    | EPI_ISL_452202      | Maharashtra | 99.9732                          | 99.9651                   | 99.98                 | Male               | 26 Mild               | 2020-03-16             | 4                         |
| 348  | 452203    | EPI_ISL_452203      | Maharashtra | 99.9732                          | 99.9651                   | 99.98                 | Female             | 62 Mild               | 2020-03-22             | 3                         |
| 349  | 452204    | EPI_ISL_452204      | Maharashtra | 99.9732                          | 99.9651                   | 99.96                 | Male               | 20 Mild               | 2020-03-26             | 3                         |
| 350  | 452205    | EPI_ISL_452205      | Maharashtra | 99.9698                          | 99.9651                   | 99.98                 | Female             | 58 Mild               | 2020-03-26             | 4                         |
| 351  | 452207    | EPI_ISL_452207      | Maharashtra | 99.9631                          | 99.9512                   | 99.97                 | Female             | 10 Mild               | 2020-04-05             | 1                         |
| 352  | 452208    | EPI_ISL_452208      | Maharashtra | 99.9765                          | 99.9512                   | 99.98                 | Female             | 65 Mild               | 2020-04-05             | 0                         |
| 353  | 452209    | EPI_ISL_452209      | Maharashtra | 99.9664                          | 99.9372                   | 99.98                 | Male               | 25 Mild               | 2020-04-06             | 0                         |
| 354  | 452210    | EPI_ISL_452210      | Maharashtra | 99.953                           | 99.9372                   | 99.96                 | Male               | 1 Mild                | 2020-04-06             | 2                         |
| 355  | 452211    | EPI_ISL_452211      | Maharashtra | 99.9631                          | 99.9512                   | 99.97                 | Male               | 52 Mild               | 2020-04-13             | 1                         |
| 356  | 452212    | EPI_ISL_452212      | Maharashtra | 99.9597                          | 99.9442                   | 99.97                 | Male               | 26 Mild               | 2020-04-15             | 2                         |
| 357  | 452213    | EPI_ISL_452213      | Maharashtra | 99.9664                          | 99.9442                   | 99.97                 | Female             | 24 Mild               | 2020-03-10             | 3                         |
| 358  | 452214    | EPI_ISL_452214      | Maharashtra | 99.9698                          | 99.9791                   | 99.98                 |                    |                       | 2020-04-07             | 1                         |
| 359  | 452215    | EPI_ISL_452215      | Maharashtra | 99.9597                          | 99.9163                   | 99.97                 |                    |                       | 2020-04-22             | 2                         |

Supplementary file 4: Age, Gender and Location data for corresponding 611 SARS-Cov-2 genomes

| S No | Genome ID | GISAID Accession ID | State          | Genome                       |                           |                       | GISAID Patient age | GISAID Patient status | GISAID Collection date | Sum of Mutation Incidence |   |
|------|-----------|---------------------|----------------|------------------------------|---------------------------|-----------------------|--------------------|-----------------------|------------------------|---------------------------|---|
|      |           |                     |                | Detective AA NT Identity (%) | Detective AA Identity (%) | NCBI BLAST Per. ident |                    |                       |                        |                           |   |
| 360  | 452216    | EPI_ISL_452216      | Maharashtra    | 99.9564                      | 99.9233                   | 99.96                 |                    |                       | 2020-04-27             | 4                         |   |
| 361  | 452217    | EPI_ISL_452217      | Maharashtra    | 99.9698                      | 99.986                    | 99.97                 |                    |                       | 2020-04-26             | 4                         |   |
| 362  | 452790    | EPI_ISL_452790      | Madhya Pradesh | 99.7769                      | 99.6633                   | 99.96                 |                    |                       | 2020-04-24             | 0                         |   |
| 363  | 452791    | EPI_ISL_452791      | Madhya Pradesh | 99.8112                      | 99.7268                   | 99.78                 |                    |                       | 2020-04-27             | 1                         |   |
| 364  | 452792    | EPI_ISL_452792      | Madhya Pradesh | 99.7898                      | 99.6633                   | 99.96                 |                    |                       | 2020-04-30             | 2                         |   |
| 365  | 452793    | EPI_ISL_452793      | Madhya Pradesh | 99.8683                      | 99.7545                   | 99.93                 |                    |                       | 2020-05-03             | 2                         |   |
| 366  | 452794    | EPI_ISL_452794      | Madhya Pradesh | 99.9329                      | 99.9093                   | 99.93                 |                    |                       | 2020-05-08             | 2                         |   |
| 367  | 452795    | EPI_ISL_452795      | Madhya Pradesh | 99.9464                      | 99.8674                   | 99.95                 |                    |                       | 2020-05-09             | 2                         |   |
| 368  | 454524    | EPI_ISL_454524      | Maharashtra    | 99.8892                      | 99.8255                   | 99.85                 | Male               | 37                    | Mild                   | 2020-04-20                | 3 |
| 369  | 454525    | EPI_ISL_454525      | Maharashtra    | 99.916                       | 99.8181                   | 99.73                 | Male               | 41                    | Mild                   | 2020-03-12                | 3 |
| 370  | 454526    | EPI_ISL_454526      | Maharashtra    | 99.943                       | 99.9093                   | 99.95                 | Female             | 12                    | Mild                   | 2020-03-13                | 3 |
| 371  | 454527    | EPI_ISL_454527      | Maharashtra    | 99.9396                      | 99.9163                   | 99.94                 | Female             | 59                    | Mild                   | 2020-03-13                | 2 |
| 372  | 454528    | EPI_ISL_454528      | Maharashtra    | 99.9463                      | 99.8464                   | 99.9                  | Male               | 50                    | Mild                   | 2020-03-17                | 4 |
| 373  | 454529    | EPI_ISL_454529      | Maharashtra    | 99.9731                      | 99.9791                   | 99.91                 | Male               | 17                    | Mild                   | 2020-03-21                | 1 |
| 374  | 454531    | EPI_ISL_454531      | Maharashtra    | 99.9698                      | 99.9651                   | 99.92                 | Male               | 65                    | Mild                   | 2020-03-22                | 3 |
| 375  | 454532    | EPI_ISL_454532      | Maharashtra    | 99.9597                      | 99.9581                   | 99.89                 | Female             | 45                    | Mild                   | 2020-03-23                | 0 |
| 376  | 454533    | EPI_ISL_454533      | Maharashtra    | 99.9362                      | 99.9511                   | 99.9                  | Male               | 53                    | Mild                   | 2020-03-23                | 0 |
| 377  | 454534    | EPI_ISL_454534      | Maharashtra    | 99.9293                      | 99.9581                   | 99.98                 | Female             | 5                     | Mild                   | 2020-03-24                | 4 |
| 378  | 454536    | EPI_ISL_454536      | Maharashtra    | 99.9664                      | 99.9581                   | 99.91                 | Female             | 39                    | Mild                   | 2020-03-26                | 5 |
| 379  | 454537    | EPI_ISL_454537      | Maharashtra    | 99.9429                      | 99.9372                   | 99.97                 | Male               | 45                    | Mild                   | 2020-03-26                | 9 |
| 380  | 454540    | EPI_ISL_454540      | Maharashtra    | 99.9664                      | 99.9372                   | 99.97                 | Male               | 35                    | Mild                   | 2020-04-01                | 1 |
| 381  | 454542    | EPI_ISL_454542      | Maharashtra    | 99.9698                      | 99.9372                   | 99.97                 | Male               | 17                    | Mild                   | 2020-03-30                | 1 |
| 382  | 454543    | EPI_ISL_454543      | Maharashtra    | 99.9496                      | 99.8883                   | 99.87                 | Female             | 40                    | Mild                   | 2020-03-31                | 0 |
| 383  | 454544    | EPI_ISL_454544      | Maharashtra    | 99.9461                      | 99.8319                   | 99.78                 | Female             | 35                    | Mild                   | 2020-04-02                | 6 |
| 384  | 454546    | EPI_ISL_454546      | Maharashtra    | 99.963                       | 99.8951                   | 99.9                  | Male               | 19                    | Mild                   | 2020-04-03                | 0 |
| 385  | 454547    | EPI_ISL_454547      | Maharashtra    | 99.9664                      | 99.9233                   | 99.97                 | Male               | 23                    | Mild                   | 2020-04-04                | 0 |
| 386  | 454549    | EPI_ISL_454549      | Maharashtra    | 99.9698                      | 99.9512                   | 99.98                 | Male               | 22                    | Mild                   | 2020-04-05                | 4 |
| 387  | 454551    | EPI_ISL_454551      | Maharashtra    | 99.9463                      | 99.9023                   | 99.95                 | Female             | 63                    | Mild                   | 2020-04-07                | 2 |
| 388  | 454552    | EPI_ISL_454552      | Maharashtra    | 99.9024                      | 99.7688                   | 99.97                 | Male               | 63                    | Mild                   | 2020-04-06                | 3 |
| 389  | 454557    | EPI_ISL_454557      | Maharashtra    | 99.9396                      | 99.9233                   | 99.95                 | Male               | 80                    | Mild                   | 2020-04-13                | 1 |
| 390  | 454560    | EPI_ISL_454560      | Maharashtra    | 99.9597                      | 99.9442                   | 99.91                 | Male               | 38                    | Asymptom               | 2020-04-06                | 2 |
| 391  | 454563    | EPI_ISL_454563      | Maharashtra    | 99.9061                      | 99.8116                   | 99.91                 |                    |                       | 2020-04-10             | 6                         |   |
| 392  | 454564    | EPI_ISL_454564      | Maharashtra    | 99.9496                      | 99.9232                   | 99.97                 |                    |                       | 2020-04-04             | 4                         |   |
| 393  | 454565    | EPI_ISL_454565      | Maharashtra    | 99.943                       | 99.9233                   | 99.95                 |                    |                       | 2020-03-31             | 0                         |   |
| 394  | 454566    | EPI_ISL_454566      | Maharashtra    | 99.9732                      | 99.9791                   | 99.97                 |                    |                       | 2020-04-21             | 2                         |   |
| 395  | 454567    | EPI_ISL_454567      | Maharashtra    | 99.9262                      | 99.9163                   | 99.93                 |                    |                       | 2020-04-22             | 3                         |   |
| 396  | 454568    | EPI_ISL_454568      | Maharashtra    | 99.953                       | 99.8603                   | 99.86                 |                    |                       | 2020-04-25             | 2                         |   |
| 397  | 454569    | EPI_ISL_454569      | Maharashtra    | 99.9631                      | 99.9511                   | 99.89                 |                    |                       | 2020-04-26             | 3                         |   |
| 398  | 454570    | EPI_ISL_454570      | Maharashtra    | 99.9698                      | 99.9651                   | 99.97                 |                    |                       | 2020-04-26             | 1                         |   |
| 399  | 454830    | EPI_ISL_454830      | Rajasthan      | 99.9766                      | 99.9512                   | 99.98                 | Male               | 55                    | Hospitaliz             | 2020-04-23                | 1 |
| 400  | 454831    | EPI_ISL_454831      | Rajasthan      | 99.9598                      | 99.8884                   | 99.96                 | Female             | 49                    | Hospitaliz             | 2020-04-29                | 2 |
| 401  | 454832    | EPI_ISL_454832      | Rajasthan      | 99.9833                      | 99.9512                   | 99.98                 | Female             | 58                    | Hospitaliz             | 2020-04-21                | 0 |
| 402  | 454833    | EPI_ISL_454833      | Rajasthan      | 99.9698                      | 99.9442                   | 99.97                 | Male               | 56                    | Hospitaliz             | 2020-04-27                | 0 |
| 403  | 454858    | EPI_ISL_454858      | Haryana        | 99.9596                      | 99.9161                   | 99.96                 | Male               | 57                    | Hospitaliz             | 2020-04-07                | 2 |
| 404  | 454862    | EPI_ISL_454862      | Haryana        | 99.9698                      | 99.9302                   | 99.97                 | Male               | 22                    | Hospitaliz             | 2020-04-11                | 0 |
| 405  | 454866    | EPI_ISL_454866      | Haryana        | 99.9631                      | 99.9163                   | 99.96                 | Male               | 25                    | Hospitaliz             | 2020-04-16                | 1 |
| 406  | 454867    | EPI_ISL_454867      | Haryana        | 99.9765                      | 99.9442                   | 99.98                 | Male               | 25                    | Hospitaliz             | 2020-04-16                | 0 |
| 407  | 455015    | EPI_ISL_455015      | Gujarat        | 99.9731                      | 99.9087                   | 99.8                  | Male               | 55                    | Released,              | 2020-04-28                | 5 |
| 408  | 455016    | EPI_ISL_455016      | Gujarat        | 99.9732                      | 99.9442                   | 99.97                 | Male               | 10                    | Released,              | 2020-04-27                | 5 |
| 409  | 455017    | EPI_ISL_455017      | Gujarat        | 99.9665                      | 99.9791                   | 99.97                 | Male               | 33                    | Released,              | 2020-05-02                | 5 |
| 410  | 455018    | EPI_ISL_455018      | Gujarat        | 99.9765                      | 99.9651                   | 99.98                 | Male               | 44                    | Released,              | 2020-05-02                | 3 |
| 411  | 455019    | EPI_ISL_455019      | Gujarat        | 99.9832                      | 99.986                    | 99.98                 | Male               | 18                    | Released,              | 2020-05-02                | 1 |
| 412  | 455020    | EPI_ISL_455020      | Gujarat        | 99.9765                      | 99.9791                   | 99.98                 | Male               | 20                    | Released,              | 2020-05-02                | 2 |
| 413  | 455021    | EPI_ISL_455021      | Gujarat        | 99.9732                      | 99.9791                   | 99.97                 | Male               | 50                    | Released,              | 2020-05-02                | 3 |
| 414  | 455022    | EPI_ISL_455022      | Gujarat        | 99.9832                      | 99.986                    | 99.98                 | Male               | 49                    | Released,              | 2020-05-02                | 1 |
| 415  | 455023    | EPI_ISL_455023      | Gujarat        | 99.9665                      | 99.9791                   | 99.97                 | Male               | 53                    | Released,              | 2020-05-02                | 5 |
| 416  | 455024    | EPI_ISL_455024      | Gujarat        | 99.9832                      | 99.986                    | 99.98                 | Male               | 38                    | Released,              | 2020-05-02                | 1 |
| 417  | 455025    | EPI_ISL_455025      | Gujarat        | 99.9799                      | 99.9721                   | 99.98                 | Female             | 22                    | Released,              | 2020-05-02                | 1 |
| 418  | 455026    | EPI_ISL_455026      | Gujarat        | 99.9799                      | 99.9721                   | 99.98                 | Female             | 60                    | Released,              | 2020-05-02                | 2 |
| 419  | 455027    | EPI_ISL_455027      | Gujarat        | 99.9732                      | 99.9791                   | 99.97                 | Male               | 51                    | Released,              | 2020-05-02                | 3 |
| 420  | 455478    | EPI_ISL_455478      | Odisha         | 99.9699                      | 99.9651                   | 99.97                 |                    |                       | 2020-04-09             | 3                         |   |
| 421  | 455640    | EPI_ISL_455640      | West Bengal    | 99.9798                      | 99.9651                   | 99.93                 |                    |                       | 2020-03-27             | 1                         |   |
| 422  | 455643    | EPI_ISL_455643      | West Bengal    | 99.9866                      | 99.986                    | 99.99                 |                    |                       | 2020-03-30             | 0                         |   |
| 423  | 455644    | EPI_ISL_455644      | West Bengal    | 99.9698                      | 99.9512                   | 99.97                 |                    |                       | 2020-04-02             | 0                         |   |
| 424  | 455645    | EPI_ISL_455645      | West Bengal    | 99.9799                      | 99.9791                   | 99.98                 |                    |                       | 2020-04-03             | 3                         |   |
| 425  | 455646    | EPI_ISL_455646      | West Bengal    | 99.9766                      | 99.9651                   | 99.98                 |                    |                       | 2020-04-03             | 2                         |   |
| 426  | 455647    | EPI_ISL_455647      | West Bengal    | 99.9833                      | 99.9721                   | 99.98                 |                    |                       | 2020-04-19             | 1                         |   |
| 427  | 455648    | EPI_ISL_455648      | West Bengal    | 99.9799                      | 99.9721                   | 99.98                 |                    |                       | 2020-04-20             | 1                         |   |
| 428  | 455649    | EPI_ISL_455649      | West Bengal    | 99.9732                      | 99.9651                   | 99.97                 |                    |                       | 2020-04-20             | 4                         |   |
| 429  | 455650    | EPI_ISL_455650      | West Bengal    | 99.9833                      | 99.9721                   | 99.98                 |                    |                       | 2020-04-20             | 1                         |   |
| 430  | 455651    | EPI_ISL_455651      | West Bengal    | 99.9766                      | 99.9651                   | 99.98                 |                    |                       | 2020-04-21             | 1                         |   |
| 431  | 455652    | EPI_ISL_455652      | West Bengal    | 99.9766                      | 99.9581                   | 99.98                 |                    |                       | 2020-04-21             | 3                         |   |
| 432  | 455653    | EPI_ISL_455653      | West Bengal    | 99.9732                      | 99.9791                   | 99.97                 |                    |                       | 2020-04-21             | 4                         |   |
| 433  | 455655    | EPI_ISL_455655      | Rajasthan      | 99.9766                      | 99.9791                   | 99.98                 |                    |                       | 2020-04-30             | 1                         |   |
| 434  | 455656    | EPI_ISL_455656      | West Bengal    | 99.9665                      | 99.9233                   | 99.97                 |                    |                       | 2020-04-30             | 0                         |   |
| 435  | 455658    | EPI_ISL_455658      | West Bengal    | 99.9665                      | 99.9233                   | 99.97                 |                    |                       | 2020-04-30             | 4                         |   |
| 436  | 455659    | EPI_ISL_455659      | West Bengal    | 99.9766                      | 99.9721                   | 99.98                 |                    |                       | 2020-05-01             | 1                         |   |
| 437  | 455660    | EPI_ISL_455660      | West Bengal    | 99.9699                      | 99.9372                   | 99.97                 |                    |                       | 2020-05-01             | 1                         |   |
| 438  | 455662    | EPI_ISL_455662      | West Bengal    | 99.9799                      | 99.9651                   | 99.98                 |                    |                       | 2020-05-02             | 1                         |   |
| 439  | 455663    | EPI_ISL_455663      | West Bengal    | 99.9799                      | 99.9721                   | 99.98                 |                    |                       | 2020-05-02             | 2                         |   |
| 440  | 455667    | EPI_ISL_455667      | West Bengal    | 99.9732                      | 99.986                    | 99.97                 |                    |                       | 2020-05-03             | 3                         |   |
| 441  | 455668    | EPI_ISL_455668      | West Bengal    | 99.9699                      | 99.9581                   | 99.97                 |                    |                       | 2020-05-05             | 4                         |   |
| 442  | 455669    | EPI_ISL_455669      | West Bengal    | 99.9665                      | 99.9512                   | 99.97                 |                    |                       | 2020-05-03             | 4                         |   |
| 443  | 455670    | EPI_ISL_455670      | West Bengal    | 99.9699                      | 99.9372                   | 99.97                 |                    |                       | 2020-05-03             | 3                         |   |
| 444  | 455671    | EPI_ISL_455671      | West Bengal    | 99.9699                      | 99.9651                   | 99.97                 |                    |                       | 2020-05-03             | 5                         |   |
| 445  | 455672    | EPI_ISL_455672      | West Bengal    | 99.9799                      | 99.9791                   | 99.98                 |                    |                       | 2020-05-03             | 1                         |   |
| 446  | 455673    | EPI_ISL_455673      | West Bengal    | 99.9732                      | 99.9721                   | 99.93                 |                    |                       | 2020-05-02             | 3                         |   |
| 447  | 455674    | EPI_ISL_455674      | West Bengal    | 99.9732                      | 99.986                    | 99.97                 |                    |                       | 2020-05-03             | 3                         |   |
| 448  | 455675    | EPI_ISL_455675      | West Bengal    | 99.9732                      | 99.9791                   | 99.97                 |                    |                       | 2020-05-03             | 4                         |   |
| 449  | 455676    | EPI_ISL_455676      | West Bengal    | 99.9732                      | 99.986                    | 99.97                 |                    |                       | 2020-05-03             | 3                         |   |

| S No | Genome ID | GISAIID Accession ID | State       | Genome<br>Detective<br>NT Identity<br>(%) | Genome<br>Detective<br>AA<br>Identity<br>(%) | NCBI<br>BLAST<br>Per.<br>ident | GISAIID<br>Gender | GISAIID<br>Patient<br>age | GISAIID<br>Patient<br>status | GISAIID<br>Collection<br>date | Sum of<br>Mutation<br>Incidence |
|------|-----------|----------------------|-------------|-------------------------------------------|----------------------------------------------|--------------------------------|-------------------|---------------------------|------------------------------|-------------------------------|---------------------------------|
|      |           |                      |             |                                           |                                              |                                |                   |                           |                              |                               |                                 |
| 450  | 455678    | EPI_ISL_455678       | West Bengal | 99.9699                                   | 99.9372                                      | 99.97                          |                   |                           |                              | 2020-04-30                    | 1                               |
| 451  | 455679    | EPI_ISL_455679       | West Bengal | 99.9765                                   | 99.9581                                      | 99.98                          |                   |                           |                              | 2020-05-04                    | 0                               |
| 452  | 455749    | EPI_ISL_455749       | Odisha      | 99.9494                                   | 99.9163                                      | 99.95                          |                   |                           |                              | 2020-05-06                    | 6                               |
| 453  | 455751    | EPI_ISL_455751       | Odisha      | 99.9618                                   | 99.9289                                      | 99.98                          |                   |                           |                              | 2020-05-06                    | 8                               |
| 454  | 455752    | EPI_ISL_455752       | Odisha      | 99.9595                                   | 99.9441                                      | 99.96                          |                   |                           |                              | 2020-05-06                    | 3                               |
| 455  | 455754    | EPI_ISL_455754       | Odisha      | 99.9663                                   | 99.9651                                      | 99.97                          |                   |                           |                              | 2020-05-06                    | 3                               |
| 456  | 455755    | EPI_ISL_455755       | Odisha      | 99.9831                                   | 99.9721                                      | 99.93                          |                   |                           |                              | 2020-05-07                    | 1                               |
| 457  | 455757    | EPI_ISL_455757       | Odisha      | 99.9831                                   | 99.979                                       | 99.98                          |                   |                           |                              | 2020-05-07                    | 1                               |
| 458  | 455758    | EPI_ISL_455758       | Odisha      | 99.9626                                   | 99.9229                                      | 99.9                           |                   |                           |                              | 2020-05-07                    | 8                               |
| 459  | 455760    | EPI_ISL_455760       | Odisha      | 99.973                                    | 99.9581                                      | 99.97                          |                   |                           |                              | 2020-05-07                    | 6                               |
| 460  | 455761    | EPI_ISL_455761       | Odisha      | 99.9764                                   | 99.9581                                      | 99.98                          |                   |                           |                              | 2020-05-07                    | 5                               |
| 461  | 455763    | EPI_ISL_455763       | Odisha      | 99.9765                                   | 99.9651                                      | 99.98                          |                   |                           |                              | 2020-05-07                    | 4                               |
| 462  | 455764    | EPI_ISL_455764       | Odisha      | 99.9697                                   | 99.9512                                      | 99.97                          |                   |                           |                              | 2020-05-07                    | 7                               |
| 463  | 455765    | EPI_ISL_455765       | Odisha      | 99.9629                                   | 99.9651                                      | 99.96                          |                   |                           |                              | 2020-05-07                    | 4                               |
| 464  | 455766    | EPI_ISL_455766       | Odisha      | 99.9697                                   | 99.9512                                      | 99.97                          |                   |                           |                              | 2020-05-07                    | 7                               |
| 465  | 455767    | EPI_ISL_455767       | Odisha      | 99.9697                                   | 99.9512                                      | 99.97                          |                   |                           |                              | 2020-05-07                    | 7                               |
| 466  | 455768    | EPI_ISL_455768       | Odisha      | 99.9663                                   | 99.9372                                      | 99.97                          |                   |                           |                              | 2020-05-07                    | 5                               |
| 467  | 455770    | EPI_ISL_455770       | Odisha      | 99.9663                                   | 99.9442                                      | 99.97                          |                   |                           |                              | 2020-05-07                    | 8                               |
| 468  | 455771    | EPI_ISL_455771       | Odisha      | 99.9594                                   | 99.9371                                      | 99.97                          |                   |                           |                              | 2020-03-19                    | 3                               |
| 469  | 455775    | EPI_ISL_455775       | Odisha      | 99.9765                                   | 99.9791                                      | 99.98                          |                   |                           |                              | 2020-04-04                    | 2                               |
| 470  | 455776    | EPI_ISL_455776       | Odisha      | 99.9697                                   | 99.9721                                      | 99.97                          |                   |                           |                              | 2020-04-04                    | 3                               |
| 471  | 455777    | EPI_ISL_455777       | Odisha      | 99.9764                                   | 99.9791                                      | 99.98                          |                   |                           |                              | 2020-04-04                    | 2                               |
| 472  | 455778    | EPI_ISL_455778       | Odisha      | 99.9765                                   | 99.9791                                      | 99.98                          |                   |                           |                              | 2020-04-04                    | 2                               |
| 473  | 455779    | EPI_ISL_455779       | Odisha      | 99.9765                                   | 99.9791                                      | 99.98                          |                   |                           |                              | 2020-04-04                    | 2                               |
| 474  | 455780    | EPI_ISL_455780       | Odisha      | 99.9765                                   | 99.9791                                      | 99.98                          |                   |                           |                              | 2020-04-08                    | 2                               |
| 475  | 455782    | EPI_ISL_455782       | Odisha      | 99.9729                                   | 99.979                                       | 99.97                          |                   |                           |                              | 2020-04-02                    | 2                               |
| 476  | 455783    | EPI_ISL_455783       | Odisha      | 99.9764                                   | 99.9721                                      | 99.98                          |                   |                           |                              | 2020-04-02                    | 3                               |
| 477  | 455784    | EPI_ISL_455784       | Odisha      | 99.973                                    | 99.9651                                      | 99.9                           |                   |                           |                              | 2020-04-02                    | 2                               |
| 478  | 455786    | EPI_ISL_455786       | Odisha      | 99.9831                                   | 99.986                                       | 99.98                          |                   |                           |                              | 2020-05-04                    | 0                               |
| 479  | 455787    | EPI_ISL_455787       | Odisha      | 99.9865                                   | 99.986                                       | 99.99                          |                   |                           |                              | 2020-05-04                    | 0                               |
| 480  | 458030    | EPI_ISL_458030       | Tamil Nadu  | 99.9698                                   | 99.9581                                      | 99.97                          |                   |                           |                              | 2020-04-26                    | 1                               |
| 481  | 458031    | EPI_ISL_458031       | Tamil Nadu  | 99.9698                                   | 99.9512                                      | 99.97                          |                   |                           |                              | 2020-04-26                    | 2                               |
| 482  | 458032    | EPI_ISL_458032       | Tamil Nadu  | 99.9732                                   | 99.9651                                      | 99.97                          |                   |                           |                              | 2020-04-27                    | 1                               |
| 483  | 458033    | EPI_ISL_458033       | Tamil Nadu  | 99.9698                                   | 99.9512                                      | 99.97                          |                   |                           |                              | 2020-04-29                    | 2                               |
| 484  | 458034    | EPI_ISL_458034       | Tamil Nadu  | 99.9698                                   | 99.9512                                      | 99.97                          |                   |                           |                              | 2020-04-29                    | 2                               |
| 485  | 458035    | EPI_ISL_458035       | Tamil Nadu  | 99.9698                                   | 99.9302                                      | 99.97                          |                   |                           |                              | 2020-04-29                    | 1                               |
| 486  | 458036    | EPI_ISL_458036       | Tamil Nadu  | 99.9698                                   | 99.9651                                      | 99.97                          |                   |                           |                              | 2020-04-29                    | 2                               |
| 487  | 458037    | EPI_ISL_458037       | Tamil Nadu  | 99.9665                                   | 99.9651                                      | 99.97                          |                   |                           |                              | 2020-04-29                    | 2                               |
| 488  | 458038    | EPI_ISL_458038       | Tamil Nadu  | 99.9631                                   | 99.9512                                      | 99.96                          |                   |                           |                              | 2020-04-29                    | 3                               |
| 489  | 458039    | EPI_ISL_458039       | Tamil Nadu  | 99.9598                                   | 99.9512                                      | 99.96                          |                   |                           |                              | 2020-05-06                    | 3                               |
| 490  | 458040    | EPI_ISL_458040       | Tamil Nadu  | 99.9631                                   | 99.9442                                      | 99.96                          |                   |                           |                              | 2020-05-06                    | 2                               |
| 491  | 458041    | EPI_ISL_458041       | Tamil Nadu  | 99.9598                                   | 99.9372                                      | 99.96                          |                   |                           |                              | 2020-05-06                    | 3                               |
| 492  | 458042    | EPI_ISL_458042       | Tamil Nadu  | 99.9564                                   | 99.9442                                      | 99.96                          |                   |                           |                              | 2020-05-06                    | 4                               |
| 493  | 458043    | EPI_ISL_458043       | Tamil Nadu  | 99.9631                                   | 99.9581                                      | 99.96                          |                   |                           |                              | 2020-05-06                    | 3                               |
| 494  | 458044    | EPI_ISL_458044       | Tamil Nadu  | 99.9665                                   | 99.9651                                      | 99.97                          |                   |                           |                              | 2020-05-06                    | 2                               |
| 495  | 458045    | EPI_ISL_458045       | Telangana   | 99.9464                                   | 99.9093                                      | 99.95                          |                   |                           |                              | 2020-05-11                    | 8                               |
| 496  | 458046    | EPI_ISL_458046       | Telangana   | 99.9497                                   | 99.9233                                      | 99.95                          |                   |                           |                              | 2020-05-11                    | 6                               |
| 497  | 458047    | EPI_ISL_458047       | Telangana   | 99.9564                                   | 99.9302                                      | 99.96                          |                   |                           |                              | 2020-05-11                    | 6                               |
| 498  | 458048    | EPI_ISL_458048       | Telangana   | 99.9497                                   | 99.9233                                      | 99.95                          |                   |                           |                              | 2020-05-11                    | 6                               |
| 499  | 458049    | EPI_ISL_458049       | Telangana   | 99.9631                                   | 99.9233                                      | 99.96                          |                   |                           |                              | 2020-05-11                    | 5                               |
| 500  | 458050    | EPI_ISL_458050       | Telangana   | 99.9464                                   | 99.9163                                      | 99.95                          |                   |                           |                              | 2020-05-11                    | 7                               |
| 501  | 458051    | EPI_ISL_458051       | Telangana   | 99.9665                                   | 99.9581                                      | 99.97                          |                   |                           |                              | 2020-05-12                    | 3                               |
| 502  | 458052    | EPI_ISL_458052       | Telangana   | 99.9698                                   | 99.9721                                      | 99.97                          |                   |                           |                              | 2020-05-12                    | 3                               |
| 503  | 458053    | EPI_ISL_458053       | Telangana   | 99.9732                                   | 99.9791                                      | 99.97                          |                   |                           |                              | 2020-05-12                    | 1                               |
| 504  | 458054    | EPI_ISL_458054       | Telangana   | 99.9631                                   | 99.9372                                      | 99.96                          |                   |                           |                              | 2020-05-13                    | 3                               |
| 505  | 458055    | EPI_ISL_458055       | Telangana   | 99.9497                                   | 99.9163                                      | 99.95                          |                   |                           |                              | 2020-05-13                    | 5                               |
| 506  | 458056    | EPI_ISL_458056       | Telangana   | 99.9564                                   | 99.9163                                      | 99.96                          |                   |                           |                              | 2020-05-13                    | 4                               |
| 507  | 458057    | EPI_ISL_458057       | Telangana   | 99.9396                                   | 99.9023                                      | 99.94                          |                   |                           |                              | 2020-05-13                    | 8                               |
| 508  | 458058    | EPI_ISL_458058       | Telangana   | 99.9464                                   | 99.9233                                      | 99.95                          |                   |                           |                              | 2020-05-13                    | 7                               |
| 509  | 458059    | EPI_ISL_458059       | Telangana   | 99.9497                                   | 99.9302                                      | 99.95                          |                   |                           |                              | 2020-05-13                    | 4                               |
| 510  | 458060    | EPI_ISL_458060       | Telangana   | 99.9531                                   | 99.9233                                      | 99.95                          |                   |                           |                              | 2020-05-13                    | 4                               |
| 511  | 458061    | EPI_ISL_458061       | Telangana   | 99.9531                                   | 99.9372                                      | 99.95                          |                   |                           |                              | 2020-05-13                    | 4                               |
| 512  | 458062    | EPI_ISL_458062       | Telangana   | 99.9665                                   | 99.9163                                      | 99.97                          |                   |                           |                              | 2020-04-20                    | 0                               |
| 513  | 458063    | EPI_ISL_458063       | Telangana   | 99.9698                                   | 99.9233                                      | 99.97                          |                   |                           |                              | 2020-04-20                    | 1                               |
| 514  | 458064    | EPI_ISL_458064       | Telangana   | 99.9732                                   | 99.9581                                      | 99.97                          |                   |                           |                              | 2020-05-11                    | 2                               |
| 515  | 458065    | EPI_ISL_458065       | Telangana   | 99.9732                                   | 99.9581                                      | 99.97                          |                   |                           |                              | 2020-05-11                    | 2                               |
| 516  | 458066    | EPI_ISL_458066       | Telangana   | 99.9832                                   | 99.9512                                      | 99.98                          |                   |                           |                              | 2020-04-13                    | 0                               |
| 517  | 458067    | EPI_ISL_458067       | Telangana   | 99.9765                                   | 99.9442                                      | 99.98                          |                   |                           |                              | 2020-04-15                    | 2                               |
| 518  | 458068    | EPI_ISL_458068       | Telangana   | 99.9698                                   | 99.9442                                      | 99.97                          |                   |                           |                              | 2020-04-14                    | 2                               |
| 519  | 458069    | EPI_ISL_458069       | Telangana   | 99.9732                                   | 99.9233                                      | 99.97                          |                   |                           |                              | 2020-04-03                    | 0                               |
| 520  | 458070    | EPI_ISL_458070       | Telangana   | 99.9698                                   | 99.9372                                      | 99.97                          |                   |                           |                              | 2020-04-12                    | 3                               |
| 521  | 458071    | EPI_ISL_458071       | Telangana   | 99.9799                                   | 99.9442                                      | 99.98                          |                   |                           |                              | 2020-04-01                    | 0                               |
| 522  | 458072    | EPI_ISL_458072       | Telangana   | 99.9665                                   | 99.9233                                      | 99.97                          |                   |                           |                              | 2020-04-08                    | 2                               |
| 523  | 458073    | EPI_ISL_458073       | Telangana   | 99.9665                                   | 99.9163                                      | 99.97                          |                   |                           |                              | 2020-04-20                    | 0                               |
| 524  | 458074    | EPI_ISL_458074       | Telangana   | 99.9631                                   | 99.9163                                      | 99.96                          |                   |                           |                              | 2020-04-20                    | 1                               |
| 525  | 458075    | EPI_ISL_458075       | Telangana   | 99.9732                                   | 99.9442                                      | 99.97                          |                   |                           |                              | 2020-04-15                    | 3                               |
| 526  | 458076    | EPI_ISL_458076       | Telangana   | 99.9698                                   | 99.9163                                      | 99.97                          |                   |                           |                              | 2020-04-20                    | 0                               |
| 527  | 458077    | EPI_ISL_458077       | Telangana   | 99.9698                                   | 99.9442                                      | 99.97                          |                   |                           |                              | 2020-04-18                    | 2                               |
| 528  | 458080    | EPI_ISL_458080       | Telangana   | 100                                       | 100                                          | 100                            |                   |                           |                              | 2020-04-03                    | 0                               |
| 529  | 458086    | EPI_ISL_458086       | Gujarat     | 99.9598                                   | 99.9581                                      | 99.96                          | Female            | 70                        | Hospitaliz                   | 2020-05-24                    | 7                               |
| 530  | 458087    | EPI_ISL_458087       | Gujarat     | 99.9765                                   | 99.9791                                      | 99.98                          | Male              | 37                        | Hospitaliz                   | 2020-05-24                    | 2                               |
| 531  | 458088    | EPI_ISL_458088       | Gujarat     | 99.9665                                   | 99.9651                                      | 99.97                          | Male              | 51                        | Hospitaliz                   | 2020-05-24                    | 4                               |
| 532  | 458089    | EPI_ISL_458089       | Gujarat     | 99.9732                                   | 99.9721                                      | 99.97                          | Female            | 75                        | Hospitaliz                   | 2020-05-24                    | 2                               |
| 533  | 458090    | EPI_ISL_458090       | Gujarat     | 99.9531                                   | 99.9372                                      | 99.95                          | Female            | 56                        | Hospitaliz                   | 2020-05-24                    | 7                               |
| 534  | 458091    | EPI_ISL_458091       | Gujarat     | 99.9564                                   | 99.9442                                      | 99.96                          | Female            | 56                        | Hospitaliz                   | 2020-05-24                    | 7                               |
| 535  | 458092    | EPI_ISL_458092       | Gujarat     | 99.9464                                   | 99.9233                                      | 99.95                          | Male              | 65                        | Hospitaliz                   | 2020-05-24                    | 9                               |
| 536  | 458093    | EPI_ISL_458093       | Gujarat     | 99.9732                                   | 99.9721                                      | 99.97                          | Male              | 65                        | Hospitaliz                   | 2020-05-24                    | 2                               |
| 537  | 458094    | EPI_ISL_458094       | Gujarat     | 99.9665                                   | 99.9651                                      | 99.97                          | Male              | 58                        | Hospitaliz                   | 2020-05-24                    | 4                               |
| 538  | 458095    | EPI_ISL_458095       | Gujarat     | 99.9698                                   | 99.9651                                      | 99.97                          | Male              | 58                        | Hospitaliz                   | 2020-05-24                    | 3                               |
| 539  | 458096    | EPI_ISL_458096       | Gujarat     | 99.9698                                   | 99.9372                                      | 99.97                          | Male              | 63                        | Hospitaliz                   | 2020-05-24                    | 2                               |



| S No | Genome ID | GISAID Accession ID | State     | Genome                       |                           | NCBI BLAST Per. ident | GISAID Gender | GISAID Patient age | GISAID Patient status | GISAID Collection date | Sum of Mutation Incidence |
|------|-----------|---------------------|-----------|------------------------------|---------------------------|-----------------------|---------------|--------------------|-----------------------|------------------------|---------------------------|
|      |           |                     |           | Detective AA NT Identity (%) | Detective AA Identity (%) |                       |               |                    |                       |                        |                           |
| 540  | 458097    | EPI_ISL_458097      | Gujarat   | 99.9631                      | 99.9581                   | 99.96                 | Female        | 65                 | Hospitaliz            | 2020-05-24             | 4                         |
| 541  | 458098    | EPI_ISL_458098      | Gujarat   | 99.9665                      | 99.9651                   | 99.97                 | Female        | 65                 | Hospitaliz            | 2020-05-24             | 4                         |
| 542  | 458099    | EPI_ISL_458099      | Gujarat   | 99.9631                      | 99.9651                   | 99.96                 | Female        | 40                 | Hospitaliz            | 2020-05-24             | 5                         |
| 543  | 458100    | EPI_ISL_458100      | Gujarat   | 99.9564                      | 99.9372                   | 99.96                 | Female        | 75                 | Hospitaliz            | 2020-05-24             | 7                         |
| 544  | 458101    | EPI_ISL_458101      | Gujarat   | 99.9698                      | 99.9512                   | 99.97                 | Female        | 75                 | Hospitaliz            | 2020-05-24             | 3                         |
| 545  | 458102    | EPI_ISL_458102      | Gujarat   | 99.9732                      | 99.9651                   | 99.97                 | Female        | 80                 | Hospitaliz            | 2020-05-24             | 3                         |
| 546  | 458103    | EPI_ISL_458103      | Gujarat   | 99.9564                      | 99.9512                   | 99.96                 | Male          | 50                 | Released,             | 2020-05-05             | 6                         |
| 547  | 458104    | EPI_ISL_458104      | Gujarat   | 99.9799                      | 99.9721                   | 99.98                 | Female        | 60                 | Released,             | 2020-05-06             | 1                         |
| 548  | 458105    | EPI_ISL_458105      | Gujarat   | 99.9832                      | 99.9721                   | 99.98                 | Female        | 70                 | Released,             | 2020-05-06             | 1                         |
| 549  | 458106    | EPI_ISL_458106      | Gujarat   | 99.9799                      | 99.9721                   | 99.98                 | Female        | 45                 | Released,             | 2020-05-16             | 1                         |
| 550  | 458107    | EPI_ISL_458107      | Gujarat   | 99.9765                      | 99.9721                   | 99.98                 | Female        | 45                 | Released,             | 2020-05-16             | 1                         |
| 551  | 458108    | EPI_ISL_458108      | Gujarat   | 99.9799                      | 99.986                    | 99.98                 |               |                    |                       | 2020-05-16             | 1                         |
| 552  | 458109    | EPI_ISL_458109      | Gujarat   | 99.9832                      | 99.9581                   | 99.79                 |               |                    |                       | 2020-05-17             | 1                         |
| 553  | 458110    | EPI_ISL_458110      | Gujarat   | 99.9698                      | 99.9511                   | 99.77                 |               |                    |                       | 2020-05-17             | 5                         |
| 554  | 458111    | EPI_ISL_458111      | Gujarat   | 99.9531                      | 99.9512                   | 99.95                 | Male          | 30                 | Released,             | 2020-05-17             | 8                         |
| 555  | 458112    | EPI_ISL_458112      | Gujarat   | 99.9564                      | 99.9512                   | 99.96                 | Male          | 32                 | Released,             | 2020-05-18             | 5                         |
| 556  | 458113    | EPI_ISL_458113      | Gujarat   | 99.9497                      | 99.9442                   | 99.95                 | Male          | 32                 | Released,             | 2020-05-18             | 6                         |
| 557  | 458298    | EPI_ISL_458298      | Telangana | 99.9765                      | 99.9233                   | 99.98                 |               |                    |                       | 2020-04-06             | 0                         |
| 558  | 459911    | EPI_ISL_459911      | Delhi     | 99.9397                      | 99.8674                   | 99.94                 | Female        | 48                 | Hospitaliz            | 2020-05-09             | 2                         |
| 559  | 459913    | EPI_ISL_459913      | Delhi     | 99.896                       | 99.7558                   | 99.9                  |               |                    |                       | 2020-05-03             | 0                         |
| 560  | 459914    | EPI_ISL_459914      | Delhi     | 99.8791                      | 99.7418                   | 99.88                 | Male          | 29                 | Hospitaliz            | 2020-05-01             | 1                         |
| 561  | 459915    | EPI_ISL_459915      | Delhi     | 99.9498                      | 99.8884                   | 99.95                 | Male          | 28                 | Hospitaliz            | 2020-05-12             | 0                         |
| 562  | 459916    | EPI_ISL_459916      | Delhi     | 99.9431                      | 99.8744                   | 99.94                 |               |                    |                       | 2020-05-12             | 0                         |
| 563  | 459917    | EPI_ISL_459917      | Delhi     | 99.9363                      | 99.8603                   | 99.94                 |               |                    |                       | 2020-05-08             | 0                         |
| 564  | 459918    | EPI_ISL_459918      | Delhi     | 99.9331                      | 99.8535                   | 99.93                 | Female        | 23                 | Quarantin             | 2020-05-09             | 0                         |
| 565  | 459919    | EPI_ISL_459919      | Delhi     | 99.9599                      | 99.8953                   | 99.96                 | Female        | 29                 | Quarantin             | 2020-05-21             | 0                         |
| 566  | 459920    | EPI_ISL_459920      | Delhi     | 99.9465                      | 99.8674                   | 99.95                 | Male          | 46                 | Quarantin             | 2020-05-21             | 0                         |
| 567  | 459921    | EPI_ISL_459921      | Delhi     | 99.9465                      | 99.8884                   | 99.95                 | Male          | 23                 | Hospitaliz            | 2020-05-08             | 0                         |
| 568  | 459922    | EPI_ISL_459922      | Delhi     | 99.9364                      | 99.8605                   | 99.94                 | Male          | 28                 | Hospitaliz            | 2020-05-10             | 0                         |
| 569  | 459923    | EPI_ISL_459923      | Delhi     | 99.9264                      | 99.8395                   | 99.93                 | Male          | 36                 | Hospitaliz            | 2020-05-08             | 0                         |
| 570  | 459924    | EPI_ISL_459924      | Delhi     | 99.9331                      | 99.8605                   | 99.93                 |               |                    |                       | 2020-05-08             | 0                         |
| 571  | 459926    | EPI_ISL_459926      | Delhi     | 99.8829                      | 99.7488                   | 99.88                 |               |                    |                       | 2020                   | 0                         |
| 572  | 459927    | EPI_ISL_459927      | Delhi     | 99.913                       | 99.8186                   | 99.91                 |               |                    |                       | 2020                   | 0                         |
| 573  | 459932    | EPI_ISL_459932      | Delhi     | 99.8661                      | 99.686                    | 99.87                 | Female        | 32                 | Hospitaliz            | 2020-05-13             | 0                         |
| 574  | 459933    | EPI_ISL_459933      | Delhi     | 99.9164                      | 99.8326                   | 99.92                 | Female        | 24                 | Hospitaliz            | 2020-05-05             | 0                         |
| 575  | 459934    | EPI_ISL_459934      | Delhi     | 99.9164                      | 99.8186                   | 99.92                 | Female        | 23                 | Hospitaliz            | 2020-05-05             | 0                         |
| 576  | 459935    | EPI_ISL_459935      | Delhi     | 99.903                       | 99.8326                   | 99.9                  | Female        | 36                 | Hospitaliz            | 2020-05-06             | 0                         |
| 577  | 459937    | EPI_ISL_459937      | Delhi     | 99.9261                      | 99.8182                   | 99.93                 | Female        | 74                 | Hospitaliz            | 2020-05-10             | 0                         |
| 578  | 459938    | EPI_ISL_459938      | Delhi     | 99.9123                      | 99.8246                   | 99.95                 | Male          | 61                 | Hospitaliz            | 2020-05-11             | 0                         |
| 579  | 459939    | EPI_ISL_459939      | Delhi     | 99.9192                      | 99.825                    | 99.95                 | Male          | 70                 | Hospitaliz            | 2020-05-11             | 0                         |
| 580  | 459940    | EPI_ISL_459940      | Delhi     | 99.8963                      | 99.7907                   | 99.9                  | Male          | 67                 | Hospitaliz            | 2020-05-10             | 0                         |
| 581  | 459941    | EPI_ISL_459941      | Delhi     | 99.9097                      | 99.8186                   | 99.91                 | Female        | 69                 | Hospitaliz            | 2020-05-11             | 0                         |
| 582  | 459942    | EPI_ISL_459942      | Delhi     | 99.9331                      | 99.8814                   | 99.93                 | Male          | 32                 | Hospitaliz            | 2020-04-27             | 0                         |
| 583  | 459943    | EPI_ISL_459943      | Delhi     | 99.9164                      | 99.8605                   | 99.92                 | Female        | 35                 | Hospitaliz            | 2020-05-01             | 0                         |
| 584  | 461478    | EPI_ISL_461478      | Gujarat   | 99.9732                      | 99.9651                   | 99.97                 | Female        | 45                 | Released              | 2020-05-02             | 4                         |
| 585  | 461479    | EPI_ISL_461479      | Gujarat   | 99.9765                      | 99.9651                   | 99.98                 | Female        | 45                 | Released              | 2020-05-02             | 3                         |
| 586  | 461480    | EPI_ISL_461480      | Gujarat   | 99.9631                      | 99.9581                   | 99.96                 | Female        | 53                 | Released              | 2020-05-02             | 4                         |
| 587  | 461481    | EPI_ISL_461481      | Gujarat   | 99.9799                      | 99.986                    | 99.98                 | Male          | 18                 | Released              | 2020-04-27             | 1                         |
| 588  | 461482    | EPI_ISL_461482      | Gujarat   | 99.9799                      | 99.9791                   | 99.98                 | Male          | 18                 | Released              | 2020-04-27             | 2                         |
| 589  | 461483    | EPI_ISL_461483      | Gujarat   | 99.9799                      | 99.986                    | 99.98                 | Male          | 68                 | Hospitaliz            | 2020-05-27             | 1                         |
| 590  | 461484    | EPI_ISL_461484      | Gujarat   | 99.9498                      | 99.9372                   | 99.95                 | Female        | 60                 | Hospitaliz            | 2020-05-27             | 8                         |
| 591  | 461485    | EPI_ISL_461485      | Gujarat   | 99.9531                      | 99.9302                   | 99.95                 | Female        | 57                 | Deceased              | 2020-05-27             | 7                         |
| 592  | 461486    | EPI_ISL_461486      | Gujarat   | 99.9799                      | 99.9791                   | 99.98                 | Male          | 83                 | Hospitaliz            | 2020-05-27             | 1                         |
| 593  | 461487    | EPI_ISL_461487      | Gujarat   | 99.9732                      | 99.9791                   | 99.98                 | Male          | 83                 | Hospitaliz            | 2020-05-27             | 2                         |
| 594  | 461488    | EPI_ISL_461488      | Gujarat   | 99.9531                      | 99.9442                   | 99.95                 | Female        | 50                 | Hospitaliz            | 2020-05-27             | 7                         |
| 595  | 461489    | EPI_ISL_461489      | Gujarat   | 99.9598                      | 99.9651                   | 99.96                 | Female        | 45                 | Hospitaliz            | 2020-05-27             | 6                         |
| 596  | 461490    | EPI_ISL_461490      | Gujarat   | 99.9799                      | 99.986                    | 99.98                 | Female        | 45                 | Hospitaliz            | 2020-05-27             | 1                         |
| 597  | 461491    | EPI_ISL_461491      | Gujarat   | 99.9665                      | 99.9721                   | 99.97                 | Male          | 60                 | Hospitaliz            | 2020-05-27             | 3                         |
| 598  | 461492    | EPI_ISL_461492      | Gujarat   | 99.9698                      | 99.9791                   | 99.97                 | Male          | 60                 | Hospitaliz            | 2020-05-27             | 5                         |
| 599  | 461493    | EPI_ISL_461493      | Gujarat   | 99.9732                      | 99.9721                   | 99.97                 | Female        | 45                 | Deceased              | 2020-05-27             | 1                         |
| 600  | 461494    | EPI_ISL_461494      | Gujarat   | 99.9732                      | 99.9791                   | 99.97                 | Female        | 45                 | Deceased              | 2020-05-27             | 3                         |
| 601  | 461495    | EPI_ISL_461495      | Gujarat   | 99.943                       | 99.9163                   | 99.94                 | Male          | 54                 | Hospitaliz            | 2020-05-27             | 11                        |
| 602  | 461496    | EPI_ISL_461496      | Gujarat   | 99.9765                      | 99.9721                   | 99.98                 | Male          | 54                 | Hospitaliz            | 2020-05-27             | 1                         |
| 603  | 461497    | EPI_ISL_461497      | Gujarat   | 99.9732                      | 99.9442                   | 99.97                 | Female        | 58                 | Released              | 2020-05-27             | 3                         |
| 604  | 461498    | EPI_ISL_461498      | Gujarat   | 99.9698                      | 99.9442                   | 99.97                 | Female        | 58                 | Released              | 2020-05-27             | 4                         |
| 605  | 461499    | EPI_ISL_461499      | Gujarat   | 99.9531                      | 99.9442                   | 99.95                 | Male          | 73                 | Hospitaliz            | 2020-05-27             | 7                         |
| 606  | 461500    | EPI_ISL_461500      | Gujarat   | 99.9631                      | 99.9581                   | 99.96                 | Female        | 72                 | Deceased              | 2020-05-27             | 4                         |
| 607  | 461501    | EPI_ISL_461501      | Gujarat   | 99.9464                      | 99.9372                   | 99.95                 | Male          | 50                 | Deceased              | 2020-05-27             | 6                         |
| 608  | 461502    | EPI_ISL_461502      | Gujarat   | 99.9531                      | 99.9442                   | 99.95                 | Male          | 50                 | Deceased              | 2020-05-27             | 5                         |
| 609  | 461503    | EPI_ISL_461503      | Gujarat   | 99.9765                      | 99.9721                   | 99.98                 | Male          | 86                 | Hospitaliz            | 2020-05-27             | 1                         |
| 610  | 461504    | EPI_ISL_461504      | Gujarat   | 99.9665                      | 99.9791                   | 99.97                 | Male          | 86                 | Hospitaliz            | 2020-05-27             | 5                         |
| 611  | 461505    | EPI_ISL_461505      | Gujarat   | 99.9832                      | 99.9721                   | 99.98                 | Male          | 65                 | Hospitaliz            | 2020-05-27             | 0                         |
| 612  | 461506    | EPI_ISL_461506      | Gujarat   | 99.9698                      | 99.9651                   | 99.97                 | Male          | 65                 | Hospitaliz            | 2020-05-27             | 2                         |

| Supplementary file 5: Details of protein prediction outcomes for 281 variants affecting amino acid sequence through different tools |                 |              |             |               |                  |          |                          |             |                      |
|-------------------------------------------------------------------------------------------------------------------------------------|-----------------|--------------|-------------|---------------|------------------|----------|--------------------------|-------------|----------------------|
| S.No                                                                                                                                | Mutational Site | Substitution | AA Position | Gene Location | Protein Location | varclass | SIFT                     | PROVEAN     | ws-SNPs&GO'S Phd-SNP |
| 1                                                                                                                                   | 335             | C>T          | R24C        | ORF1a         | NSP1             | SNP      | TOLERATED                | Neutral     | Disease              |
| 2                                                                                                                                   | 377             | G>T          | V38F        | ORF1a         | NSP1             | SNP      | AFFECT PROTEIN FUNCTION* | Neutral     | Neutral              |
| 3                                                                                                                                   | 506             | C>T          | H81Y        | ORF1a         | NSP1             | SNP      | TOLERATED                | Neutral     | Neutral              |
| 4                                                                                                                                   | 635             | C>T          | R124C       | ORF1a         | NSP1             | SNP      | AFFECT PROTEIN FUNCTION* | Neutral     | Disease              |
| 5                                                                                                                                   | 674             | G>T          | G137C       | ORF1a         | NSP1             | SNP      | TOLERATED                | Neutral     | Neutral              |
| 6                                                                                                                                   | 706             | C>A          | D147E       | ORF1a         | NSP1             | SNP      | TOLERATED                | Neutral     | Neutral              |
| 7                                                                                                                                   | 771             | T>C          | V169A       | ORF1a         | NSP1             | SNP      | TOLERATED                | Neutral     | Neutral              |
| 8                                                                                                                                   | 840             | G>A          | G192D       | ORF1a         | NSP2             | SNP      | TOLERATED                | Neutral     | Disease              |
| 9                                                                                                                                   | 851             | T>C          | Y196H       | ORF1a         | NSP2             | SNP      | TOLERATED                | Neutral     | Neutral              |
| 10                                                                                                                                  | 875             | C>T          | L204F       | ORF1a         | NSP2             | SNP      | TOLERATED                | Neutral     | Neutral              |
| 11                                                                                                                                  | 1278            | A>G          | K338R       | ORF1a         | NSP2             | SNP      | TOLERATED                | Neutral     | Neutral              |
| 12                                                                                                                                  | 2040            | C>T          | T592I       | ORF1a         | NSP2             | SNP      | AFFECT PROTEIN FUNCTION* | Neutral     | Disease              |
| 13                                                                                                                                  | 2111            | A>T          | I616F       | ORF1a         | NSP2             | SNP      | TOLERATED                | Neutral     | Neutral              |
| 14                                                                                                                                  | 2127            | A>C          | Y621S       | ORF1a         | NSP2             | SNP      | TOLERATED                | Neutral     | Neutral              |
| 15                                                                                                                                  | 2141            | C>A          | P626T       | ORF1a         | NSP2             | SNP      | TOLERATED                | Neutral     | Disease              |
| 16                                                                                                                                  | 2164            | G>T          | E633D       | ORF1a         | NSP2             | SNP      | TOLERATED                | Neutral     | Neutral              |
| 17                                                                                                                                  | 2277            | T>C          | I671T       | ORF1a         | NSP2             | SNP      | AFFECT PROTEIN FUNCTION  | Neutral     | Neutral              |
| 18                                                                                                                                  | 2309            | G>T          | V682L       | ORF1a         | NSP2             | SNP      | TOLERATED                | Neutral     | Neutral              |
| 19                                                                                                                                  | 2388            | C>T          | T708I       | ORF1a         | NSP2             | SNP      | TOLERATED                | Neutral     | Neutral              |
| 20                                                                                                                                  | 2393            | G>T          | V710F       | ORF1a         | NSP2             | SNP      | AFFECT PROTEIN FUNCTION  | Neutral     | Neutral              |
| 21                                                                                                                                  | 2480            | A>G          | I739V       | ORF1a         | NSP2             | SNP      | TOLERATED                | Neutral     | Neutral              |
| 22                                                                                                                                  | 2558            | C>T          | P765S       | ORF1a         | NSP2             | SNP      | TOLERATED                | Neutral     | Neutral              |
| 23                                                                                                                                  | 2879            | G>A          | A872T       | ORF1a         | NSP3             | SNP      | TOLERATED                | Neutral     | Neutral              |
| 24                                                                                                                                  | 2910            | C>T          | T882I       | ORF1a         | NSP3             | SNP      | TOLERATED                | Neutral     | Neutral              |
| 25                                                                                                                                  | 3039            | A>G          | Y925C       | ORF1a         | NSP3             | SNP      | TOLERATED                | Neutral     | Neutral              |
| 26                                                                                                                                  | 3054            | A>G          | D930G       | ORF1a         | NSP3             | SNP      | TOLERATED                | Neutral     | Disease              |
| 27                                                                                                                                  | 3085            | G>T          | E940D       | ORF1a         | NSP3             | SNP      | TOLERATED                | Neutral     | Neutral              |
| 28                                                                                                                                  | 3176            | C>T          | P971S       | ORF1a         | NSP3             | SNP      | TOLERATED                | Neutral     | Neutral              |
| 29                                                                                                                                  | 3231            | G>T          | G989V       | ORF1a         | NSP3             | SNP      | TOLERATED                | Neutral     | Neutral              |
| 30                                                                                                                                  | 3351            | G>T          | S1029I      | ORF1a         | NSP3             | SNP      | TOLERATED                | Neutral     | Neutral              |
| 31                                                                                                                                  | 3372            | A>G          | D1036G      | ORF1a         | NSP3             | SNP      | TOLERATED                | Neutral     | Disease              |
| 32                                                                                                                                  | 3426            | C>T          | P1054L      | ORF1a         | NSP3             | SNP      | TOLERATED                | Neutral     | Neutral              |
| 33                                                                                                                                  | 3471            | G>A          | G1069E      | ORF1a         | NSP3             | SNP      | AFFECT PROTEIN FUNCTION  | Deleterious | Disease              |
| 34                                                                                                                                  | 3514            | G>T          | M1083I      | ORF1a         | NSP3             | SNP      | TOLERATED                | Neutral     | Neutral              |
| 35                                                                                                                                  | 3686            | C>T          | H1141Y      | ORF1a         | NSP3             | SNP      | TOLERATED                | Neutral     | Neutral              |
| 36                                                                                                                                  | 4067            | G>A          | A1268T      | ORF1a         | NSP3             | SNP      | TOLERATED                | Neutral     | Neutral              |
| 37                                                                                                                                  | 4158            | C>T          | A1298V      | ORF1a         | NSP3             | SNP      | AFFECT PROTEIN FUNCTION* | Neutral     | Neutral              |
| 38                                                                                                                                  | 4182            | C>T          | A1306V      | ORF1a         | NSP3             | SNP      | AFFECT PROTEIN FUNCTION* | Neutral     | Disease              |
| 39                                                                                                                                  | 4679            | C>T          | P1472S      | ORF1a         | NSP3             | SNP      | AFFECT PROTEIN FUNCTION* | Neutral     | Disease              |
| 40                                                                                                                                  | 4809            | C>T          | S1515F      | ORF1a         | NSP3             | SNP      | AFFECT PROTEIN FUNCTION* | Neutral     | Neutral              |
| 41                                                                                                                                  | 4866            | G>T          | S1534I      | ORF1a         | NSP3             | SNP      | TOLERATED                | Neutral     | Neutral              |
| 42                                                                                                                                  | 4893            | C>A          | T1543K      | ORF1a         | NSP3             | SNP      | TOLERATED                | Neutral     | Neutral              |
| 43                                                                                                                                  | 4965            | C>T          | T1567I      | ORF1a         | NSP3             | SNP      | TOLERATED                | Neutral     | Neutral              |
| 44                                                                                                                                  | 5029            | G>T          | M1588I      | ORF1a         | NSP3             | SNP      | TOLERATED                | Neutral     | Neutral              |
| 45                                                                                                                                  | 5139            | A>T          | D1625V      | ORF1a         | NSP3             | SNP      | AFFECT PROTEIN FUNCTION  | Neutral     | Disease              |
| 46                                                                                                                                  | 5151            | T>C          | V1629A      | ORF1a         | NSP3             | SNP      | TOLERATED                | Neutral     | Neutral              |
| 47                                                                                                                                  | 5210            | G>T          | A1649S      | ORF1a         | NSP3             | SNP      | AFFECT PROTEIN FUNCTION  | Neutral     | Neutral              |
| 48                                                                                                                                  | 5289            | A>G          | Y1675C      | ORF1a         | NSP3             | SNP      | AFFECT PROTEIN FUNCTION  | Deleterious | Disease              |
| 49                                                                                                                                  | 5462            | A>G          | S1733G      | ORF1a         | NSP3             | SNP      | TOLERATED                | Neutral     | Neutral              |
| 50                                                                                                                                  | 5547            | C>T          | T1761I      | ORF1a         | NSP3             | SNP      | TOLERATED                | Neutral     | Neutral              |
| 51                                                                                                                                  | 5700            | C>A          | A1812D      | ORF1a         | NSP3             | SNP      | TOLERATED                | Neutral     | Disease              |
| 52                                                                                                                                  | 5730            | C>T          | T1822I      | ORF1a         | NSP3             | SNP      | TOLERATED                | Neutral     | Neutral              |
| 53                                                                                                                                  | 5825            | A>G          | T1854A      | ORF1a         | NSP3             | SNP      | TOLERATED                | Neutral     | Neutral              |
| 54                                                                                                                                  | 5826            | C>T          | T1854I      | ORF1a         | NSP3             | SNP      | TOLERATED                | Neutral     | Neutral              |
| 55                                                                                                                                  | 5846            | G>A          | G1861S      | ORF1a         | NSP3             | SNP      | TOLERATED                | Neutral     | Neutral              |
| 56                                                                                                                                  | 5877            | A>C          | N1871T      | ORF1a         | NSP3             | SNP      | TOLERATED                | Neutral     | Neutral              |
| 57                                                                                                                                  | 6183            | A>G          | K1973R      | ORF1a         | NSP3             | SNP      | TOLERATED                | Neutral     | Neutral              |
| 58                                                                                                                                  | 6197            | T>C          | S1978P      | ORF1a         | NSP3             | SNP      | TOLERATED                | Neutral     | Disease              |
| 59                                                                                                                                  | 6308            | A>C          | S2015R      | ORF1a         | NSP3             | SNP      | TOLERATED                | Neutral     | Disease              |
| 60                                                                                                                                  | 6309            | G>A          | S2015K      | ORF1a         | NSP3             | SNP      | TOLERATED                | Neutral     | Disease              |
| 61                                                                                                                                  | 6350            | A>G          | K2029E      | ORF1a         | NSP3             | SNP      | TOLERATED                | Neutral     | Neutral              |
| 62                                                                                                                                  | 6369            | G>A          | G2035E      | ORF1a         | NSP3             | SNP      | TOLERATED                | Neutral     | Neutral              |
| 63                                                                                                                                  | 6402            | C>T          | P2046L      | ORF1a         | NSP3             | SNP      | AFFECT PROTEIN FUNCTION  | Neutral     | Neutral              |
| 64                                                                                                                                  | 6501            | C>T          | P2079L      | ORF1a         | NSP3             | SNP      | AFFECT PROTEIN FUNCTION  | Neutral     | Neutral              |
| 65                                                                                                                                  | 6573            | C>T          | S2103F      | ORF1a         | NSP3             | SNP      | TOLERATED                | Neutral     | Neutral              |
| 66                                                                                                                                  | 6617            | G>T          | G2118C      | ORF1a         | NSP3             | SNP      | AFFECT PROTEIN FUNCTION  | Neutral     | Neutral              |
| 67                                                                                                                                  | 6695            | C>T          | P2144S      | ORF1a         | NSP3             | SNP      | TOLERATED                | Neutral     | Neutral              |
| 68                                                                                                                                  | 6701            | C>T          | L2146F      | ORF1a         | NSP3             | SNP      | TOLERATED                | Neutral     | Neutral              |
| 69                                                                                                                                  | 6702            | T>C          | L2146P      | ORF1a         | NSP3             | SNP      | AFFECT PROTEIN FUNCTION  | Neutral     | Disease              |
| 70                                                                                                                                  | 6989            | T>C          | S2242P      | ORF1a         | NSP3             | SNP      | AFFECT PROTEIN FUNCTION* | Neutral     | Disease              |
| 71                                                                                                                                  | 7011            | C>T          | A2249V      | ORF1a         | NSP3             | SNP      | TOLERATED                | Neutral     | Neutral              |
| 72                                                                                                                                  | 7086            | C>T          | T2274I      | ORF1a         | NSP3             | SNP      | TOLERATED                | Neutral     | Neutral              |
| 73                                                                                                                                  | 7164            | C>T          | T2300I      | ORF1a         | NSP3             | SNP      | TOLERATED                | Neutral     | Neutral              |
| 74                                                                                                                                  | 7173            | C>A          | S2303Y      | ORF1a         | NSP3             | SNP      | AFFECT PROTEIN FUNCTION  | Neutral     | Neutral              |
| 75                                                                                                                                  | 7232            | T>G          | L2323V      | ORF1a         | NSP3             | SNP      | TOLERATED                | Neutral     | Neutral              |
| 76                                                                                                                                  | 7379            | G>A          | V2372I      | ORF1a         | NSP3             | SNP      | TOLERATED                | Neutral     | Neutral              |
| 77                                                                                                                                  | 7704            | C>T          | P2480L      | ORF1a         | NSP3             | SNP      | TOLERATED                | Neutral     | Neutral              |
| 78                                                                                                                                  | 7823            | C>T          | H2520Y      | ORF1a         | NSP3             | SNP      | TOLERATED                | Neutral     | Neutral              |
| 79                                                                                                                                  | 8043            | C>T          | A2593V      | ORF1a         | NSP3             | SNP      | TOLERATED                | Neutral     | Neutral              |
| 80                                                                                                                                  | 8102            | G>T          | V2613F      | ORF1a         | NSP3             | SNP      | AFFECT PROTEIN FUNCTION  | Neutral     | Neutral              |
| 81                                                                                                                                  | 8139            | C>T          | S2625F      | ORF1a         | NSP3             | SNP      | TOLERATED                | Neutral     | Neutral              |
| 82                                                                                                                                  | 8151            | T>C          | V2629A      | ORF1a         | NSP3             | SNP      | AFFECT PROTEIN FUNCTION  | Neutral     | Neutral              |
| 83                                                                                                                                  | 8247            | C>T          | S2661F      | ORF1a         | NSP3             | SNP      | TOLERATED                | Neutral     | Neutral              |
| 84                                                                                                                                  | 8336            | T>A          | C2691S      | ORF1a         | NSP3             | SNP      | AFFECT PROTEIN FUNCTION  | Deleterious | Disease              |
| 85                                                                                                                                  | 8460            | C>A          | A2732D      | ORF1a         | NSP3             | SNP      | AFFECT PROTEIN FUNCTION  | Deleterious | Disease              |
| 86                                                                                                                                  | 8571            | G>T          | W2769L      | ORF1a         | NSP4             | SNP      | TOLERATED                | Neutral     | Neutral              |
| 87                                                                                                                                  | 8595            | C>T          | T2777I      | ORF1a         | NSP4             | SNP      | AFFECT PROTEIN FUNCTION  | Neutral     | Neutral              |
| 88                                                                                                                                  | 8607            | T>C          | L2781P      | ORF1a         | NSP4             | SNP      | AFFECT PROTEIN FUNCTION  | Neutral     | Disease              |
| 89                                                                                                                                  | 8653            | G>T          | M2796I      | ORF1a         | NSP4             | SNP      | TOLERATED                | Neutral     | Neutral              |
| 90                                                                                                                                  | 8756            | C>T          | H2831Y      | ORF1a         | NSP4             | SNP      | TOLERATED                | Neutral     | Neutral              |
| 91                                                                                                                                  | 9246            | C>T          | A2994V      | ORF1a         | NSP4             | SNP      | TOLERATED                | Neutral     | Neutral              |
| 92                                                                                                                                  | 9357            | T>A          | F3031Y      | ORF1a         | NSP4             | SNP      | TOLERATED                | Neutral     | Neutral              |
| 93                                                                                                                                  | 9389            | G>A          | D3042N      | ORF1a         | NSP4             | SNP      | TOLERATED                | Neutral     | Neutral              |
| 94                                                                                                                                  | 9438            | C>T          | T3058I      | ORF1a         | NSP4             | SNP      | AFFECT PROTEIN FUNCTION  | Neutral     | Neutral              |
| 95                                                                                                                                  | 9477            | T>A          | F3071Y      | ORF1a         | NSP4             | SNP      | AFFECT PROTEIN FUNCTION  | Neutral     | Disease              |
| 96                                                                                                                                  | 9693            | C>T          | A3143V      | ORF1a         | NSP4             | SNP      | TOLERATED                | Neutral     | Neutral              |

| S.No | Mutational Site | Substitution | AA Position | Gene Location | Protein Location | varclass | SIFT                     | PROVEAN     | ws-SNPs&GO'S Phd-SNP |
|------|-----------------|--------------|-------------|---------------|------------------|----------|--------------------------|-------------|----------------------|
| 97   | 9743            | T>C          | Y3160H      | ORF1a         | NSP4             | SNP      | AFFECT PROTEIN FUNCTION* | Neutral     | Neutral              |
| 98   | 9746            | C>A          | L3161I      | ORF1a         | NSP4             | SNP      | TOLERATED                | Neutral     | Neutral              |
| 99   | 9933            | C>T          | T3223I      | ORF1a         | NSP4             | SNP      | AFFECT PROTEIN FUNCTION  | Deleterious | Disease              |
| 100  | 10277           | C>T          | L3338F      | ORF1a         | NSP5             | SNP      | AFFECT PROTEIN FUNCTION  | Deleterious | Disease              |
| 101  | 10401           | C>T          | A3379V      | ORF1a         | NSP5             | SNP      | AFFECT PROTEIN FUNCTION  | Deleterious | Disease              |
| 102  | 10421           | T>C          | S3386P      | ORF1a         | NSP5             | SNP      | AFFECT PROTEIN FUNCTION  | Neutral     | Disease              |
| 103  | 10434           | A>G          | Q3390R      | ORF1a         | NSP5             | SNP      | TOLERATED                | Neutral     | Neutral              |
| 104  | 10448           | C>T          | P3395S      | ORF1a         | NSP5             | SNP      | TOLERATED                | Neutral     | Neutral              |
| 105  | 10478           | A>C          | N3405L      | ORF1a         | NSP5             | SNP      | TOLERATED                | Deleterious | Neutral              |
| 106  | 10622           | A>G          | T3453A      | ORF1a         | NSP5             | SNP      | TOLERATED                | Neutral     | Neutral              |
| 107  | 10679           | T>C          | Y3472H      | ORF1a         | NSP5             | SNP      | AFFECT PROTEIN FUNCTION  | Deleterious | Disease              |
| 108  | 10815           | C>T          | S3517F      | ORF1a         | NSP5             | SNP      | AFFECT PROTEIN FUNCTION  | Deleterious | Disease              |
| 109  | 11103           | C>T          | P3613L      | ORF1a         | NSP6             | SNP      | AFFECT PROTEIN FUNCTION  | Neutral     | Neutral              |
| 110  | 11306           | G>A          | D3681N      | ORF1a         | NSP6             | SNP      | AFFECT PROTEIN FUNCTION  | Neutral     | Neutral              |
| 111  | 11456           | A>T          | I3731F      | ORF1a         | NSP6             | SNP      | AFFECT PROTEIN FUNCTION  | Neutral     | Disease              |
| 112  | 11457           | T>C          | I3731T      | ORF1a         | NSP6             | SNP      | AFFECT PROTEIN FUNCTION  | Neutral     | Neutral              |
| 113  | 11742           | A>G          | Q3826R      | ORF1a         | NSP6             | SNP      | TOLERATED                | Neutral     | Neutral              |
| 114  | 11743           | G>T          | Q3826H      | ORF1a         | NSP6             | SNP      | TOLERATED                | Neutral     | Neutral              |
| 115  | 11769           | T>C          | I3835T      | ORF1a         | NSP6             | SNP      | AFFECT PROTEIN FUNCTION  | Neutral     | Neutral              |
| 116  | 12149           | G>A          | E3962K      | ORF1a         | NSP8             | SNP      | AFFECT PROTEIN FUNCTION  | Neutral     | Neutral              |
| 117  | 12242           | C>T          | R3993C      | ORF1a         | NSP8             | SNP      | AFFECT PROTEIN FUNCTION  | Deleterious | Disease              |
| 118  | 12361           | G>T          | M4032S      | ORF1a         | NSP8             | SNP      | AFFECT PROTEIN FUNCTION  | Deleterious | Neutral              |
| 119  | 12362           | C>T          | L4033F      | ORF1a         | NSP8             | SNP      | AFFECT PROTEIN FUNCTION  | Deleterious | Neutral              |
| 120  | 12471           | A>C          | K4069T      | ORF1a         | NSP8             | SNP      | TOLERATED                | Deleterious | Neutral              |
| 121  | 12507           | A>G          | K4081R      | ORF1a         | NSP8             | SNP      | TOLERATED                | Neutral     | Neutral              |
| 122  | 12806           | G>A          | V4181I      | ORF1a         | NSP9             | SNP      | AFFECT PROTEIN FUNCTION  | Neutral     | Neutral              |
| 123  | 12989           | G>A          | V4242I      | ORF1a         | NSP9             | SNP      | AFFECT PROTEIN FUNCTION  | Neutral     | Neutral              |
| 124  | 13011           | C>T          | T4249I      | ORF1a         | NSP9             | SNP      | AFFECT PROTEIN FUNCTION  | Deleterious | Disease              |
| 125  | 13077           | C>T          | A4271V      | ORF1a         | NSP10            | SNP      | AFFECT PROTEIN FUNCTION  | Deleterious | Disease              |
| 126  | 13083           | C>T          | A4273V      | ORF1a         | NSP10            | SNP      | AFFECT PROTEIN FUNCTION  | Deleterious | Disease              |
| 127  | 13458           | C>T          | S4398L      | ORF1a         | NSP12a           | SNP      | TOLERATED                | Neutral     | Neutral              |
| 128  | 13617           | G>T          | K4451N      | ORF1ab        | NSP12b           | SNP      | AFFECT PROTEIN FUNCTION  | Neutral     | Neutral              |
| 129  | 13713           | G>T          | K4483N      | ORF1ab        | NSP12b           | SNP      | AFFECT PROTEIN FUNCTION  | Neutral     | Disease              |
| 130  | 13724           | C>T          | A4487V      | ORF1ab        | NSP12b           | SNP      | TOLERATED                | Neutral     | Neutral              |
| 131  | 13859           | A>G          | D4532G      | ORF1ab        | NSP12b           | SNP      | TOLERATED                | Deleterious | Disease              |
| 132  | 13958           | G>A          | R4565H      | ORF1ab        | NSP12b           | SNP      | TOLERATED                | Neutral     | Disease              |
| 133  | 13994           | C>T          | A4577V      | ORF1ab        | NSP12b           | SNP      | AFFECT PROTEIN FUNCTION  | Neutral     | Disease              |
| 134  | 14028           | G>T          | M4588I      | ORF1ab        | NSP12b           | SNP      | AFFECT PROTEIN FUNCTION  | Neutral     | Neutral              |
| 135  | 14041           | A>C          | I4593L      | ORF1ab        | NSP12b           | SNP      | TOLERATED                | Neutral     | Neutral              |
| 136  | 14125           | A>G          | S4621G      | ORF1ab        | NSP12b           | SNP      | TOLERATED                | Neutral     | Neutral              |
| 137  | 14198           | C>G          | A4645G      | ORF1ab        | NSP12b           | SNP      | TOLERATED                | Neutral     | Neutral              |
| 138  | 14274           | G>C          | E4670D      | ORF1ab        | NSP12b           | SNP      | TOLERATED                | Neutral     | Disease              |
| 139  | 14290           | G>T          | D4676Y      | ORF1ab        | NSP12b           | SNP      | AFFECT PROTEIN FUNCTION  | Neutral     | Disease              |
| 140  | 14318           | C>T          | T4685I      | ORF1ab        | NSP12b           | SNP      | TOLERATED                | Neutral     | Neutral              |
| 141  | 14392           | T>A          | S4710T      | ORF1ab        | NSP12b           | SNP      | AFFECT PROTEIN FUNCTION  | Neutral     | Disease              |
| 142  | 14425           | C>A          | L4721I      | ORF1ab        | NSP12b           | SNP      | TOLERATED                | Neutral     | Disease              |
| 143  | 14657           | C>T          | A4798V      | ORF1ab        | NSP12b           | SNP      | TOLERATED                | Neutral     | Neutral              |
| 144  | 14666           | C>T          | T4801I      | ORF1ab        | NSP12b           | SNP      | AFFECT PROTEIN FUNCTION  | Deleterious | Disease              |
| 145  | 15491           | A>G          | D5076G      | ORF1ab        | NSP12b           | SNP      | AFFECT PROTEIN FUNCTION  | Deleterious | Disease              |
| 146  | 15708           | G>T          | M1548I      | ORF1ab        | NSP12b           | SNP      | TOLERATED                | Deleterious | Disease              |
| 147  | 15863           | G>A          | G5200E      | ORF1ab        | NSP12b           | SNP      | AFFECT PROTEIN FUNCTION  | Deleterious | Disease              |
| 148  | 16078           | G>A          | V5272I      | ORF1ab        | NSP12b           | SNP      | AFFECT PROTEIN FUNCTION  | Neutral     | Disease              |
| 149  | 16178           | C>T          | S5305L      | ORF1ab        | NSP12b           | SNP      | TOLERATED                | Neutral     | Neutral              |
| 150  | 16355           | A>G          | K5364R      | ORF1ab        | NSP13            | SNP      | AFFECT PROTEIN FUNCTION  | Neutral     | Disease              |
| 151  | 16393           | C>T          | P5377S      | ORF1ab        | NSP13            | SNP      | TOLERATED                | Neutral     | Neutral              |
| 152  | 16732           | T>G          | S5490A      | ORF1ab        | NSP13            | SNP      | TOLERATED                | Neutral     | Neutral              |
| 153  | 16738           | G>C          | E5492Q      | ORF1ab        | NSP13            | SNP      | AFFECT PROTEIN FUNCTION  | Neutral     | Disease              |
| 154  | 17113           | A>G          | I5617V      | ORF1ab        | NSP13            | SNP      | AFFECT PROTEIN FUNCTION  | Neutral     | Disease              |
| 155  | 17122           | G>T          | A5620S      | ORF1ab        | NSP13            | SNP      | AFFECT PROTEIN FUNCTION  | Neutral     | Disease              |
| 156  | 17135           | C>T          | P5624L      | ORF1ab        | NSP13            | SNP      | TOLERATED                | Deleterious | Disease              |
| 157  | 17270           | A>G          | K5669R      | ORF1ab        | NSP13            | SNP      | TOLERATED                | Neutral     | Neutral              |
| 158  | 17440           | C>T          | P5726S      | ORF1ab        | NSP13            | SNP      | AFFECT PROTEIN FUNCTION  | Deleterious | Disease              |
| 159  | 17573           | C>T          | A5770V      | ORF1ab        | NSP13            | SNP      | TOLERATED                | Neutral     | Disease              |
| 160  | 17656           | A>G          | M5798V      | ORF1ab        | NSP13            | SNP      | TOLERATED                | Neutral     | Neutral              |
| 161  | 17722           | G>T          | V5820L      | ORF1ab        | NSP13            | SNP      | AFFECT PROTEIN FUNCTION  | Neutral     | Disease              |
| 162  | 17745           | C>A          | N5827K      | ORF1ab        | NSP13            | SNP      | AFFECT PROTEIN FUNCTION  | Neutral     | Disease              |
| 163  | 17754           | G>T          | W5830C      | ORF1ab        | NSP13            | SNP      | AFFECT PROTEIN FUNCTION  | Deleterious | Disease              |
| 164  | 17762           | C>G          | A5833G      | ORF1ab        | NSP13            | SNP      | AFFECT PROTEIN FUNCTION  | Neutral     | Disease              |
| 165  | 17763           | T>G          | A5833G      | ORF1ab        | NSP13            | SNP      | AFFECT PROTEIN FUNCTION  | Neutral     | Disease              |
| 166  | 17858           | A>G          | Y5865C      | ORF1ab        | NSP13            | SNP      | AFFECT PROTEIN FUNCTION  | Deleterious | Disease              |
| 167  | 17944           | G>T          | V5894L      | ORF1ab        | NSP13            | SNP      | TOLERATED                | Neutral     | Neutral              |
| 168  | 17959           | A>G          | I5899V      | ORF1ab        | NSP13            | SNP      | TOLERATED                | Neutral     | Neutral              |
| 169  | 17964           | G>T          | M5900I      | ORF1ab        | NSP13            | SNP      | AFFECT PROTEIN FUNCTION  | Neutral     | Disease              |
| 170  | 18032           | C>T          | T5923I      | ORF1ab        | NSP13            | SNP      | TOLERATED                | Neutral     | Neutral              |
| 171  | 18040           | G>T          | A5926S      | ORF1ab        | NSP14            | SNP      | TOLERATED                | Neutral     | Neutral              |
| 172  | 18052           | A>G          | T5930A      | ORF1ab        | NSP14            | SNP      | TOLERATED                | Neutral     | Disease              |
| 173  | 18118           | C>A          | L5952I      | ORF1ab        | NSP14            | SNP      | AFFECT PROTEIN FUNCTION  | Neutral     | Neutral              |
| 174  | 18176           | C>T          | P5971L      | ORF1ab        | NSP14            | SNP      | TOLERATED                | Neutral     | Neutral              |
| 175  | 18186           | G>T          | M5974I      | ORF1ab        | NSP14            | SNP      | TOLERATED                | Neutral     | Neutral              |
| 176  | 18803           | G>T          | S6180I      | ORF1ab        | NSP14            | SNP      | TOLERATED                | Neutral     | Disease              |
| 177  | 19086           | G>T          | K6274N      | ORF1ab        | NSP14            | SNP      | TOLERATED                | Neutral     | Neutral              |
| 178  | 19721           | A>C          | K6486T      | ORF1ab        | NSP15            | SNP      | AFFECT PROTEIN FUNCTION  | Deleterious | Disease              |
| 179  | 19735           | G>T          | D6491Y      | ORF1ab        | NSP15            | SNP      | AFFECT PROTEIN FUNCTION  | Deleterious | Disease              |
| 180  | 19816           | G>T          | V6518L      | ORF1ab        | NSP15            | SNP      | TOLERATED                | Neutral     | Neutral              |
| 181  | 19861           | G>A          | A6533T      | ORF1ab        | NSP15            | SNP      | TOLERATED                | Neutral     | Neutral              |
| 182  | 20006           | G>A          | G6581D      | ORF1ab        | NSP15            | SNP      | TOLERATED                | Neutral     | Disease              |
| 183  | 20677           | C>T          | P6805S      | ORF1ab        | NSP16            | SNP      | TOLERATED                | Neutral     | Neutral              |
| 184  | 20773           | G>T          | G6837C      | ORF1ab        | NSP16            | SNP      | AFFECT PROTEIN FUNCTION  | Deleterious | Disease              |
| 185  | 20991           | G>C          | L6909F      | ORF1ab        | NSP16            | SNP      | TOLERATED                | Neutral     | Neutral              |
| 186  | 21004           | G>T          | A6914S      | ORF1ab        | NSP16            | SNP      | TOLERATED                | Neutral     | Neutral              |
| 187  | 21137           | A>G          | K6958R      | ORF1ab        | NSP16            | SNP      | AFFECT PROTEIN FUNCTION  | Neutral     | Neutral              |
| 188  | 21724           | G>T          | L54F        | S             | S                | SNP      | TOLERATED                | Neutral     | Neutral              |
| 189  | 22004           | A>T          | N148Y       | S             | S                | SNP      | TOLERATED                | Neutral     | Neutral              |
| 190  | 22030           | G>T          | E156D       | S             | S                | SNP      | TOLERATED                | Neutral     | Neutral              |
| 191  | 22289           | G>T          | A243S       | S             | S                | SNP      | TOLERATED                | Neutral     | Neutral              |
| 192  | 22326           | C>T          | S255F       | S             | S                | SNP      | TOLERATED                | Neutral     | Neutral              |
| 193  | 22343           | G>A          | G261S       | S             | S                | SNP      | TOLERATED                | Neutral     | Neutral              |

| S.No | Mutational Site | Substitution | AA Position | Gene Location | Protein Location | varclass | SIFT                     | PROVEAN     | ws-SNPs&GO'S Phd-SNP |
|------|-----------------|--------------|-------------|---------------|------------------|----------|--------------------------|-------------|----------------------|
| 194  | 22374           | A>G          | Q271R       | S             | S                | SNP      | TOLERATED                | Neutral     | Neutral              |
| 195  | 22458           | C>T          | T299I       | S             | S                | SNP      | TOLERATED                | Neutral     | Neutral              |
| 196  | 22530           | C>T          | T323I       | S             | S                | SNP      | TOLERATED                | Neutral     | Neutral              |
| 197  | 22863           | T>A          | I434K       | S             | S                | SNP      | TOLERATED                | Neutral     | Disease              |
| 198  | 22973           | G>C          | E471Q       | S             | S                | SNP      | TOLERATED                | Neutral     | Neutral              |
| 199  | 23042           | T>C          | S494P       | S             | S                | SNP      | TOLERATED                | Neutral     | Disease              |
| 200  | 23120           | G>T          | A520S       | S             | S                | SNP      | TOLERATED                | Neutral     | Neutral              |
| 201  | 23277           | C>T          | T572I       | S             | S                | SNP      | TOLERATED                | Neutral     | Neutral              |
| 202  | 23282           | G>C          | D574Y       | S             | S                | SNP      | AFFECT PROTEIN FUNCTION* | Neutral     | Neutral              |
| 203  | 23311           | G>T          | E583D       | S             | S                | SNP      | TOLERATED                | Neutral     | Neutral              |
| 204  | 23367           | C>T          | T602I       | S             | S                | SNP      | TOLERATED                | Neutral     | Neutral              |
| 205  | 23426           | G>A          | V622I       | S             | S                | SNP      | TOLERATED                | Neutral     | Neutral              |
| 206  | 23593           | G>T          | Q677H       | S             | S                | SNP      | TOLERATED                | Neutral     | Neutral              |
| 207  | 23678           | G>T          | A706S       | S             | S                | SNP      | TOLERATED                | Neutral     | Neutral              |
| 208  | 23730           | C>T          | T723I       | S             | S                | SNP      | AFFECT PROTEIN FUNCTION* | Deleterious | Neutral              |
| 209  | 23843           | A>T          | T761S       | S             | S                | SNP      | TOLERATED                | Neutral     | Neutral              |
| 210  | 23868           | G>T          | G769V       | S             | S                | SNP      | TOLERATED                | Neutral     | Neutral              |
| 211  | 23952           | T>G          | F797C       | S             | S                | SNP      | TOLERATED                | Deleterious | Disease              |
| 212  | 24042           | C>T          | T827I       | S             | S                | SNP      | TOLERATED                | Neutral     | Neutral              |
| 213  | 24045           | T>C          | L828P       | S             | S                | SNP      | AFFECT PROTEIN FUNCTION* | Neutral     | Disease              |
| 214  | 24053           | G>T          | A831S       | S             | S                | SNP      | TOLERATED                | Neutral     | Neutral              |
| 215  | 24131           | G>T          | G857C       | S             | S                | SNP      | AFFECT PROTEIN FUNCTION* | Deleterious | Disease              |
| 216  | 24197           | G>T          | A879S       | S             | S                | SNP      | TOLERATED                | Neutral     | Neutral              |
| 217  | 24237           | C>T          | A892V       | S             | S                | SNP      | AFFECT PROTEIN FUNCTION* | Neutral     | Neutral              |
| 218  | 24350           | G>A          | A930T       | S             | S                | SNP      | AFFECT PROTEIN FUNCTION* | Deleterious | Disease              |
| 219  | 24351           | C>T          | A930V       | S             | S                | SNP      | AFFECT PROTEIN FUNCTION* | Deleterious | Disease              |
| 220  | 24384           | C>A          | T941K       | S             | S                | SNP      | AFFECT PROTEIN FUNCTION* | Deleterious | Neutral              |
| 221  | 24624           | C>T          | S1021F      | S             | S                | SNP      | AFFECT PROTEIN FUNCTION* | Deleterious | Disease              |
| 222  | 24642           | C>T          | T1027I      | S             | S                | SNP      | TOLERATED                | Neutral     | Neutral              |
| 223  | 24764           | G>T          | V1068F      | S             | S                | SNP      | AFFECT PROTEIN FUNCTION* | Neutral     | Disease              |
| 224  | 24811           | T>A          | H1083Q      | S             | S                | SNP      | AFFECT PROTEIN FUNCTION* | Neutral     | Neutral              |
| 225  | 24863           | C>T          | H1101Y      | S             | S                | SNP      | TOLERATED                | Neutral     | Neutral              |
| 226  | 24872           | G>T          | V1104L      | S             | S                | SNP      | TOLERATED                | Neutral     | Neutral              |
| 227  | 24933           | G>T          | G1124V      | S             | S                | SNP      | TOLERATED                | Neutral     | Neutral              |
| 228  | 25019           | G>T          | D1153Y      | S             | S                | SNP      | AFFECT PROTEIN FUNCTION* | Deleterious | Neutral              |
| 229  | 25098           | T>A          | I1179N      | S             | S                | SNP      | AFFECT PROTEIN FUNCTION* | Deleterious | Disease              |
| 230  | 25104           | A>G          | K1181R      | S             | S                | SNP      | TOLERATED                | Neutral     | Neutral              |
| 231  | 25135           | G>T          | K1191N      | S             | S                | SNP      | TOLERATED                | Neutral     | Neutral              |
| 232  | 25163           | C>A          | Q1201K      | S             | S                | SNP      | TOLERATED                | Neutral     | Neutral              |
| 233  | 25290           | G>T          | C1243F      | S             | S                | SNP      | AFFECT PROTEIN FUNCTION* | Deleterious | Neutral              |
| 234  | 25311           | G>T          | C1250F      | S             | S                | SNP      | AFFECT PROTEIN FUNCTION* | Deleterious | Disease              |
| 235  | 25314           | G>T          | G1251V      | S             | S                | SNP      | TOLERATED                | Neutral     | Neutral              |
| 236  | 25350           | C>T          | P1263L      | S             | S                | SNP      | AFFECT PROTEIN FUNCTION* | Neutral     | Neutral              |
| 237  | 25429           | G>T          | V13L        | ORF3a         | ORF3a            | SNP      | TOLERATED                | Neutral     | Neutral              |
| 238  | 25445           | G>T          | G18V        | ORF3a         | ORF3a            | SNP      | TOLERATED                | Neutral     | Neutral              |
| 239  | 25496           | T>C          | I35T        | ORF3a         | ORF3a            | SNP      | AFFECT PROTEIN FUNCTION* | Deleterious | Disease              |
| 240  | 25513           | C>T          | L41F        | ORF3a         | ORF3a            | SNP      | TOLERATED                | Deleterious | Neutral              |
| 241  | 25528           | C>T          | L46F        | ORF3a         | ORF3a            | SNP      | AFFECT PROTEIN FUNCTION* | Deleterious | Disease              |
| 242  | 25549           | C>T          | L53F        | ORF3a         | ORF3a            | SNP      | AFFECT PROTEIN FUNCTION* | Deleterious | Disease              |
| 243  | 25563           | G>T          | Q57H        | ORF3a         | ORF3a            | SNP      | AFFECT PROTEIN FUNCTION* | Deleterious | Disease              |
| 244  | 25577           | T>C          | I62T        | ORF3a         | ORF3a            | SNP      | AFFECT PROTEIN FUNCTION* | Deleterious | Neutral              |
| 245  | 25612           | T>G          | S74A        | ORF3a         | ORF3a            | SNP      | TOLERATED                | Neutral     | Neutral              |
| 246  | 25613           | C>T          | S74F        | ORF3a         | ORF3a            | SNP      | TOLERATED                | Neutral     | Disease              |
| 247  | 25621           | G>T          | V77F        | ORF3a         | ORF3a            | SNP      | TOLERATED                | Neutral     | Neutral              |
| 248  | 25634           | G>T          | C81F        | ORF3a         | ORF3a            | SNP      | AFFECT PROTEIN FUNCTION* | Deleterious | Disease              |
| 249  | 25641           | G>C          | L83F        | ORF3a         | ORF3a            | SNP      | AFFECT PROTEIN FUNCTION* | Neutral     | Disease              |
| 250  | 25647           | G>T          | L85F        | ORF3a         | ORF3a            | SNP      | AFFECT PROTEIN FUNCTION* | Deleterious | Disease              |
| 251  | 25649           | T>G          | L86W        | ORF3a         | ORF3a            | SNP      | AFFECT PROTEIN FUNCTION* | Deleterious | Disease              |
| 252  | 25904           | C>T          | S171L       | ORF3a         | ORF3a            | SNP      | AFFECT PROTEIN FUNCTION* | Neutral     | Neutral              |
| 253  | 25906           | G>T          | G172C       | ORF3a         | ORF3a            | SNP      | AFFECT PROTEIN FUNCTION* | Deleterious | Disease              |
| 254  | 25916           | C>T          | T175I       | ORF3a         | ORF3a            | SNP      | TOLERATED                | Neutral     | Neutral              |
| 255  | 25919           | C>T          | T176I       | ORF3a         | ORF3a            | SNP      | AFFECT PROTEIN FUNCTION* | Deleterious | Neutral              |
| 256  | 25961           | C>T          | T190I       | ORF3a         | ORF3a            | SNP      | AFFECT PROTEIN FUNCTION* | Neutral     | Neutral              |
| 257  | 25979           | G>T          | G196V       | ORF3a         | ORF3a            | SNP      | AFFECT PROTEIN FUNCTION* | Deleterious | Disease              |
| 258  | 26144           | G>T          | G251V       | ORF3a         | ORF3a            | SNP      | AFFECT PROTEIN FUNCTION* | Deleterious | Disease              |
| 259  | 26329           | G>A          | V29S        | E             | E                | SNP      | AFFECT PROTEIN FUNCTION* | Deleterious | Disease              |
| 260  | 26530           | A>G          | D3G         | M             | M                | SNP      | TOLERATED                | Neutral     | Neutral              |
| 261  | 26724           | G>T          | A68S        | M             | M                | SNP      | TOLERATED                | Neutral     | Neutral              |
| 262  | 26727           | G>T          | A69S        | M             | M                | SNP      | TOLERATED                | Neutral     | Disease              |
| 263  | 26730           | G>T          | V70F        | M             | M                | SNP      | TOLERATED                | Neutral     | Disease              |
| 264  | 26895           | C>T          | H125Y       | M             | M                | SNP      | TOLERATED                | Neutral     | Neutral              |
| 265  | 27379           | A>G          | I60V        | ORF6          | ORF6             | SNP      | TOLERATED                | Neutral     | Neutral              |
| 266  | 27383           | A>T          | D61L        | ORF6          | ORF6             | SNP      | AFFECT PROTEIN FUNCTION* | Deleterious | Neutral              |
| 267  | 27506           | G>T          | G38V        | ORF7a         | ORF7a            | SNP      | AFFECT PROTEIN FUNCTION* | Deleterious | Disease              |
| 268  | 27527           | C>T          | P45L        | ORF7a         | ORF7a            | SNP      | AFFECT PROTEIN FUNCTION* | Deleterious | Neutral              |
| 269  | 28289           | C>A          | P6T         | N             | N                | SNP      | AFFECT PROTEIN FUNCTION* | Neutral     | Neutral              |
| 270  | 28312           | C>T          | P13L        | N             | N                | SNP      | AFFECT PROTEIN FUNCTION* | Neutral     | Neutral              |
| 271  | 28326           | G>T          | G18V        | N             | N                | SNP      | AFFECT PROTEIN FUNCTION* | Neutral     | Neutral              |
| 272  | 28362           | G>T          | G30V        | N             | N                | SNP      | AFFECT PROTEIN FUNCTION* | Neutral     | Neutral              |
| 273  | 28371           | G>T          | S33I        | N             | N                | SNP      | AFFECT PROTEIN FUNCTION* | Neutral     | Neutral              |
| 274  | 28383           | C>T          | S37L        | N             | N                | SNP      | TOLERATED                | Neutral     | Neutral              |
| 275  | 28460           | G>A          | D63N        | N             | N                | SNP      | AFFECT PROTEIN FUNCTION  | Neutral     | Neutral              |
| 276  | 28549           | A>C          | R92S        | N             | N                | SNP      | AFFECT PROTEIN FUNCTION  | Deleterious | Disease              |
| 277  | 28690           | G>T          | L139F       | N             | N                | SNP      | TOLERATED                | Neutral     | Neutral              |
| 278  | 28703           | G>T          | D144Y       | N             | N                | SNP      | AFFECT PROTEIN FUNCTION  | Neutral     | Neutral              |
| 279  | 28727           | G>T          | A152S       | N             | N                | SNP      | TOLERATED                | Neutral     | Neutral              |
| 280  | 28739           | G>T          | A156S       | N             | N                | SNP      | AFFECT PROTEIN FUNCTION  | Neutral     | Neutral              |
| 281  | 28752           | A>C          | Q160P       | N             | N                | SNP      | AFFECT PROTEIN FUNCTION  | Neutral     | Neutral              |

Note  
 \* This substitution may have been predicted to affect function just because the sequences used were not diverse enough. There is LOW CONFIDENCE in this prediction.
